# Supplementary material for: Spectral features of nuclear DNA in human sperm assessed by Raman Microspectroscopy: Effects of UV-irradiation and hydration
Source: PLoS One. 2018 Nov 20;13(11):e0207786. doi: 10.1371/journal.pone.0207786 (PMC6245842; doi:10.1371/journal.pone.0207786)
Supplement: S2 File — Complete set of the PC loadings associated to the Principal Component Analysis concerning the comparison of the spectra of individual sperm (control/UV exposed) evaluated in aqueous medium (Fig 3B). (XLSX) [file pone.0207786.s014.xlsx]

## Sheet: Sheet1
	PC1	PC2	PC3	PC4	PC5	PC6	PC7	PC8	PC9	PC10	PC11	PC12	PC13	PC14	PC15	PC16	PC17	PC18	PC19	PC20	PC21	PC22	PC23	PC24	PC25	PC26	PC27	PC28	PC29	PC30	PC31	PC32	PC33	PC34	PC35	PC36	PC37	PC38	PC39	PC40	PC41	PC42	PC43	PC44	PC45	PC46	PC47	PC48	PC49
V1	0.022004	0.0116929	0.0242041	-0.0731453	0.0211938	-0.0394553	0.14914	0.0420966	-0.104361	0.0472528	0.00119615	-0.0514852	-0.0796305	0.0744788	-0.0309729	0.0403884	0.080846	0.056179	0.0717391	0.0438718	-0.00705513	-0.0699285	0.0241803	0.126974	0.0506903	-0.0171577	0.034773	0.0624871	-0.0162811	0.095778	0.00825681	0.0479604	-0.0995799	0.0148447	0.0134926	-0.104075	0.114716	0.0395967	0.056953	-0.0358909	0.136122	-0.034417	0.0294848	0.0321018	-2.62481e-05	-0.13563	-0.0659926	0.0634338	-0.022156
V2	0.0250933	0.0182761	0.0266676	-0.0669893	0.0312133	-0.0551166	0.155532	0.034138	-0.0977093	0.031656	-0.0274808	-0.0263503	-0.107403	0.0509829	-0.0564802	0.0146936	0.051583	0.0791956	0.0908006	0.0246169	-0.0081248	-0.0774915	0.0457545	0.101299	0.0148614	-0.0811464	0.0424237	0.0325268	0.00549785	0.080098	-0.0165277	0.0206838	-0.0406941	-0.00940026	-0.0111177	-0.060677	0.0817701	0.00445801	0.0496429	-0.0373582	0.165104	-0.0280151	0.0220714	0.000990895	-0.00245324	-0.0852309	-0.0544243	0.028184	0.00229042
V3	0.026051	0.0201048	0.027399	-0.0773475	0.0397792	-0.0620973	0.137201	0.0182231	-0.0843172	0.0189493	-0.0432252	0.00143987	-0.11426	-0.0181686	-0.0643748	-0.0162614	0.0282114	0.0786913	0.0905179	0.00131964	0.0191106	-0.0986901	0.0490821	0.0194729	-0.0123318	-0.110518	0.0388412	-0.0274887	0.0681801	0.0897449	-0.0289847	0.0323841	0.00444878	-0.0184757	-0.0279164	-0.0490784	0.0832015	-0.0241775	0.069156	-0.0768024	0.144454	-0.0325445	-0.0235289	0.00335788	0.0149949	0.0106307	-0.0599998	0.00935279	0.00477296
V4	0.0290928	0.0252923	0.0223177	-0.0745915	0.0501198	-0.0556299	0.121257	-0.017981	-0.054441	-0.00592631	-0.000840805	0.01233	-0.0959925	-0.0970842	-0.0509625	-0.067734	0.021049	0.028609	0.0912574	-0.031925	0.0130665	-0.0945523	0.0366162	-0.0458219	-0.0388007	-0.117063	0.0486637	-0.0527669	0.106163	0.085507	0.00972427	0.0218283	0.0443611	0.0103429	0.00663562	-0.0218953	0.0394052	-0.00968134	0.0657078	-0.0839466	0.0699162	-0.0619078	-0.0440101	-0.000953263	0.0302039	-0.00820004	-0.0442139	0.00699384	0.0062453
V5	0.0318853	0.0305952	0.0140633	-0.0604016	0.0505317	-0.0352596	0.114879	-0.061289	-0.0438147	-0.0321077	0.0484161	-0.00246636	-0.049008	-0.132727	-0.0120536	-0.0754294	-0.00088958	-0.0165017	0.0797225	-0.0505005	0.0381277	-0.0758045	0.00180045	-0.0475352	-0.0463443	-0.100185	0.0434088	-0.063406	0.112595	0.0739051	0.0263694	0.0292028	0.0678693	0.0163349	0.0348303	0.00916976	0.00706418	0.00218579	0.0668073	-0.101026	0.0279366	-0.0239479	-0.0724925	-0.0158504	0.0165387	-0.0105198	-0.0135822	0.0150666	0.0451781
V6	0.0335448	0.0319603	0.00331262	-0.0267813	0.0475728	-0.023114	0.125332	-0.0766817	-0.0467097	-0.0342702	0.0882035	0.00314962	0.00492274	-0.111732	0.0294935	-0.0644071	-0.0246249	-0.0366007	0.0586561	-0.0732476	0.0390619	-0.0720811	-0.0200313	-0.0294113	-0.0499113	-0.0712599	0.0693696	-0.0754849	0.0959221	0.0534572	0.0253914	0.020316	0.0488334	-0.0209979	0.0520364	0.0423316	0.00588317	-0.00209201	0.0291145	-0.124734	-0.021311	-0.0367777	-0.0545583	-0.0144706	-0.0104091	-0.0130132	0.0278466	0.0231057	0.0455326
V7	0.0366533	0.0328777	-0.000735722	-0.00239501	0.0449677	-0.0093847	0.118419	-0.0852052	-0.047529	-0.0615433	0.0877798	-0.012186	0.0372987	-0.0680152	0.0269313	-0.0218399	-0.0485857	-0.0894414	0.0248591	-0.0719795	0.0290949	-0.0592332	-0.0190458	0.00840746	-0.0603651	-0.0227963	0.0199956	-0.0602851	0.0579565	0.00375352	0.028802	0.0562743	0.0834358	0.0114795	0.0520041	0.0279566	0.0146339	0.0206739	0.0340603	-0.128093	-0.0815616	-0.00708585	-0.00143961	0.00155226	-0.0184069	-0.0331483	0.0503496	0.0428211	0.0177147
V8	0.0382536	0.0340449	-0.00610409	0.0304431	0.0383898	0.00253563	0.117448	-0.0601871	-0.0428301	-0.0455476	0.0639557	-0.0181561	0.0300403	-0.0346226	0.0224495	-0.0203215	-0.0748931	-0.108127	0.00119456	-0.0895297	0.00835343	-0.0493621	-0.0221574	0.0376011	-0.0416581	-0.000831783	0.0120633	-0.0312327	0.0177115	-0.0367916	0.0265076	0.0845656	0.10224	0.0205378	0.0437338	0.0180838	0.0426899	0.0269639	0.0216988	-0.08768	-0.0817281	-0.0111445	0.0235344	0.0366647	-0.00874239	-0.0102185	0.0626252	0.0443149	-0.0276216
V9	0.0386388	0.0343915	-0.0030394	0.0502205	0.0313564	0.00785689	0.113895	-0.0480539	-0.0302546	-0.0115983	0.0303515	-0.0438725	0.0134626	-0.0270976	0.0122755	-0.00632724	-0.0732082	-0.131329	-0.000391583	-0.116959	0.00243431	-0.0148698	-0.00619103	0.0591369	-0.0129557	0.0126429	0.0271012	-0.00897922	0.00011546	-0.0561842	0.0215324	0.0758078	0.0954009	0.0225708	0.0650787	-0.000343346	0.0490615	0.0252583	-0.0102281	-0.0423535	-0.0688128	0.00954102	0.0158406	0.0505765	0.00984137	0.0261389	0.0499288	0.0509344	-0.0283579
V10	0.039457	0.0350318	0.0031181	0.0489078	0.0219487	0.000452435	0.115269	-0.0498833	-0.0256071	0.0217229	0.00940997	-0.0538209	-0.0129621	-0.0383231	-0.00580903	0.00123712	-0.0618104	-0.128095	-0.0183848	-0.0967069	-0.0125444	0.00525205	0.00379292	0.0795163	0.0141696	0.0301928	-0.000602657	-0.0135397	-0.011744	-0.0572063	0.0215735	0.0658181	0.0695295	0.0141112	0.0534313	-0.0191366	0.0479627	0.0339885	-0.0294762	0.00173806	-0.0527977	0.0170053	0.0493885	0.0318014	0.0421072	0.0654734	0.0696031	0.0289768	-0.0150427
V11	0.0410257	0.0340965	0.0106506	0.0407471	0.0226405	-0.000672591	0.101849	-0.0400531	-0.0242734	0.0433175	-0.014951	-0.0584752	-0.0236487	-0.0506986	-0.0271932	0.00510527	-0.0523153	-0.124697	-0.0308906	-0.0790914	-0.0137114	0.0122571	0.0341125	0.0893577	0.0307186	0.000723155	-0.0118883	-0.0188371	-0.0170877	-0.0482824	0.00175506	0.0564765	0.0375765	-0.00822338	0.060082	-0.026259	0.0448702	0.0735382	-0.0352052	0.014824	-0.0441177	-0.00177888	0.0552825	0.0205989	0.0529432	0.0801508	0.0637197	0.0183619	0.00439516
V12	0.0430071	0.0386324	0.0138744	0.0263822	0.0236468	-0.0101218	0.0599729	-0.0351911	-0.0343274	0.0477058	-0.017486	-0.0584814	-0.0134952	-0.0721445	-0.0305903	-0.0204971	-0.0203787	-0.105179	-0.0428105	-0.0600189	-0.0181944	0.0185193	0.0549851	0.0763258	0.0357775	-0.050381	-0.0270052	-0.0104458	-0.0190655	-0.0551099	0.00738056	0.00557649	0.0308073	-0.0269365	0.0383022	0.00451247	0.0410548	0.115304	-0.0263351	0.02849	-0.0444194	-0.0334297	0.0449411	0.0202252	0.0613738	0.0530165	0.0629761	-0.00135737	0.00519513
V13	0.0432206	0.04328	0.0128802	0.00487019	0.0291266	-0.0152885	0.022553	-0.0368582	-0.0572806	0.0368569	0.00294442	-0.0481425	-0.00267059	-0.0827826	-0.0245308	-0.0543996	-0.00799496	-0.0870099	-0.0377289	-0.0281925	-0.0158821	0.0287234	0.0790563	0.052966	0.0283181	-0.0654536	-0.0380359	-0.0090697	-0.00577246	-0.0519489	0.00343699	-0.0247252	0.0243849	-0.0305054	0.0274331	0.0493096	0.00744931	0.105255	-0.0288637	0.00573375	-0.00452426	-0.0381304	0.0554923	0.0282085	0.0609575	0.0196153	0.104924	-0.0226844	0.000370384
V14	0.042887	0.0436544	-0.00071291	-0.00783089	0.0349934	-0.0197956	-0.0124048	-0.0342753	-0.0837382	0.026832	0.0235976	-0.0298699	-0.0023481	-0.0710406	-0.0263893	-0.0726584	0.0258654	-0.0717114	-0.0353829	-0.0167218	-0.0318225	0.0304616	0.0750226	0.00592286	0.0311679	-0.0557572	-0.0372986	-0.0228147	0.0104292	-0.0367215	0.00372195	-0.0622692	-0.00814243	-0.0111506	0.0143536	0.0700481	-0.00343126	0.0963652	-0.0113913	-0.0400439	-0.00150229	-0.0245159	0.0348415	0.025527	0.0510927	-0.0336148	0.115336	-0.0185621	0.0299186
V15	0.0435717	0.0429566	-0.00209513	-0.00861603	0.0303791	-0.0220868	-0.0271448	-0.0336168	-0.0884988	0.0129651	0.0530514	-0.00600037	0.028911	-0.0551157	-0.0165497	-0.0791734	0.0413854	-0.0514428	-0.0398316	-0.0415807	-0.0288622	0.0126433	0.0503439	-0.0221473	0.0239819	-0.0327321	-0.00762547	-0.0159173	0.0224446	-0.0315057	-0.000948398	-0.0664511	-0.0364144	-0.000837907	0.0350708	0.0758247	-0.0115093	0.0867787	-0.0204408	-0.0749659	-0.000769037	0.0067944	-0.0187503	-0.00977282	0.0502472	-0.0593607	0.0919523	-0.0292377	0.063773
V16	0.0437965	0.0426283	0.00173974	-0.0160548	0.0252292	-0.0253412	-0.0233932	-0.0438738	-0.0879847	0.0103703	0.0709633	0.0148885	0.0458221	-0.034589	0.00401414	-0.076861	0.0437352	-0.0249132	-0.0353238	-0.0483432	-0.0257164	-0.00884245	0.028468	-0.0368181	0.0104557	-0.0224603	-0.00962785	-0.00460957	0.0409575	-0.0126317	-0.00288055	-0.0706662	-0.0609473	0.000482651	0.0419657	0.0581506	-0.0305254	0.0601856	0.00172564	-0.0812043	-0.00543585	0.0240127	-0.0535713	-0.0135238	0.0386384	-0.0512529	0.0662552	-0.0307104	0.0695275
V17	0.0442097	0.0413611	0.00749206	-0.00960362	0.0311772	-0.0268669	-0.0136998	-0.0411756	-0.0900157	0.0137447	0.0704185	0.0353356	0.0584661	-0.011902	0.0250167	-0.0676837	0.0292042	-0.00406536	-0.0110072	-0.0534931	-0.032792	-0.046791	0.0269482	-0.0304518	0.00882403	-0.0194897	-0.0132805	0.0269958	0.0547961	0.00275586	-0.0158108	-0.0600363	-0.0801539	-0.0118768	0.0388231	0.0400644	-0.0400932	0.0168956	0.0169512	-0.0746236	0.0166925	0.0246494	-0.0611605	0.00196613	0.0436179	-0.0488342	0.0311366	-0.0379651	0.0316862
V18	0.042807	0.0414469	0.014078	-0.000869692	0.031443	-0.0408743	0.00665935	-0.0406333	-0.0987023	-0.0052683	0.0707633	0.0333771	0.0653975	0.0254261	0.0221207	-0.0458227	0.00409638	-0.000961928	0.0235099	-0.0387294	-0.0394528	-0.0756158	0.0383041	-0.0357837	-0.00337758	-0.0191169	-0.0290614	0.0375381	0.0513208	-0.00755227	-0.0157211	-0.0403416	-0.0892404	0.014237	0.0471468	0.00433354	-0.0507924	-0.00229707	0.0306883	-0.0885266	0.0117702	0.047076	-0.057249	0.0317745	0.0478175	-0.0295053	0.0116939	-0.030452	-0.00995485
V19	0.0411719	0.0437869	0.0226668	-0.00196375	0.0228672	-0.057944	0.0157055	-0.0344725	-0.0824949	-0.0379763	0.0657852	0.00855739	0.0472104	0.0518781	0.0207165	-0.0286341	-0.0228116	-0.0194002	0.043065	-0.0234672	-0.0424183	-0.103821	0.0463925	-0.0341706	-0.0297839	0.0119184	-0.044945	0.036793	0.0534517	-0.0324504	-0.0162513	-0.0272419	-0.0651413	0.0386092	0.0377895	-0.0122738	-0.0623641	-0.0509212	0.0560288	-0.0434678	-0.0134771	0.0532685	-0.0436266	0.0626113	0.0459749	0.0203158	-0.00764072	-0.0171485	-0.020666
V20	0.0386097	0.0419837	0.0336753	-0.0140051	0.0231361	-0.0666487	0.0169262	-0.0191297	-0.0674683	-0.0710076	0.0374337	-0.0276933	0.0366152	0.0748736	0.0237671	-0.00518885	-0.0293579	-0.0252645	0.0651511	-0.00670423	-0.0571194	-0.128393	0.0516914	-0.0360595	-0.0527867	0.0335091	-0.064415	0.0424187	0.0535144	-0.0414322	-0.021966	-0.00383307	-0.0417068	0.0452894	0.0358732	-0.0297698	-0.0388919	-0.0728578	0.0384218	-0.0169869	-0.0326501	0.0299164	-0.0189948	0.0621615	0.0325316	0.0436121	-0.014517	0.0134995	-0.0253946
V21	0.0337815	0.0409442	0.0473199	-0.046703	0.0273846	-0.0793173	-0.000927997	-0.0104147	-0.0433136	-0.0916234	0.0195981	-0.0728392	0.00753704	0.0779738	0.0195552	0.00303698	-0.0355966	-0.0278462	0.0771297	0.050837	-0.0456907	-0.100364	0.0570219	-0.0157508	-0.0467095	0.0401981	-0.102381	0.0430366	0.0434975	-0.0363937	-0.0492843	0.000673756	-0.0159394	0.0333555	0.0555596	-0.0376296	-0.0308954	-0.0749504	0.0657375	0.00941851	-0.0311262	0.0258501	-0.0235281	0.0384675	0.0272971	0.0485219	0.00165495	0.0207428	-0.0161377
V22	0.028761	0.0408231	0.0506544	-0.0755912	0.0263241	-0.0776919	-0.0157273	-0.0242123	-0.03094	-0.108123	0.0318799	-0.103908	0.00465963	0.0786823	0.0215898	0.000233847	-0.021723	-0.00288503	0.0801053	0.0948441	-0.0513545	-0.0389474	0.0521676	0.0184967	-0.0670794	0.0466062	-0.112073	0.0414022	0.00164516	-0.0431368	-0.021874	-0.0186515	0.0496135	0.0173953	0.072789	-0.00708496	-0.00657911	-0.0337561	0.038492	0.0116388	-0.0466112	0.0156571	0.0181052	0.0200154	-0.00851602	0.0132669	-0.00426563	0.0257321	0.012115
V23	0.0218739	0.0409322	0.0509214	-0.100911	0.0237814	-0.0792483	-0.0188541	-0.0243634	-0.0407172	-0.0910425	0.0613423	-0.115882	0.017586	0.0842345	0.0147939	-0.00931783	-0.00495797	0.0169344	0.05187	0.137428	-0.0239786	0.0175237	0.0274174	0.0248776	-0.0610336	0.0326731	-0.118207	0.0245147	-0.0312736	-0.021913	-0.0391197	-0.0326081	0.104751	-0.0175438	0.0634124	-0.0225928	0.00101088	-0.0278433	0.000285175	-0.000809177	-0.0490418	0.00846563	0.029419	0.0127546	-0.0441364	-0.0138999	0.0137834	0.0197403	-0.00735547
V24	0.017705	0.0402668	0.051249	-0.102572	0.0355295	-0.0678467	-0.0292781	-0.0299317	-0.0532857	-0.0701047	0.0801079	-0.103854	0.0425845	0.0943818	-0.0109227	-0.00615097	0.00184015	-0.00536625	0.0194841	0.153131	-0.0240432	0.0409055	-0.0159465	0.00449742	-0.0747793	0.0183237	-0.126854	0.0324267	-0.0585615	-0.026918	-0.00647535	-0.0182138	0.12374	-0.00863418	0.0514971	-0.0554869	-0.0215951	0.0342997	-0.0227671	0.0112438	-0.0646359	0.00497663	0.0865063	-0.0198988	-0.0718675	-0.050371	0.0209482	0.0155274	-0.0379601
V25	0.0124368	0.0442544	0.0496641	-0.106863	0.0580214	-0.0723177	-0.0147888	-0.0400302	-0.0933479	-0.0146043	0.0814968	-0.0811463	0.052472	0.0443454	-0.00418263	-0.0133783	0.0287698	-0.00072476	-0.0252787	0.14392	-0.0132447	0.0704146	-0.0727005	0.00536895	-0.0860099	0.0193937	-0.112767	0.0523855	-0.0844205	0.00561948	0.0217927	-0.00782521	0.10183	0.0361522	0.0259248	-0.0853656	-0.00979787	0.0718344	-0.00547738	0.0102821	-0.0247062	0.0417304	0.0754306	-0.00656659	-0.0469966	-0.0391021	-0.0130702	-0.0101693	-0.0385776
V26	0.00682388	0.0490819	0.0566409	-0.093805	0.0714141	-0.076444	0.0346769	-0.0282713	-0.105275	0.0490428	0.0812554	-0.0223234	0.0384652	0.0154588	0.0208416	-0.0515816	0.0509812	0.00855804	-0.0919224	0.085924	-0.0113943	0.0823348	-0.143787	-0.0336317	-0.0443972	-0.0269731	-0.0588314	0.0636913	-0.0729712	0.0536547	0.0245332	0.0242372	0.0256217	0.0317185	0.000330596	-0.0731025	-0.0149705	0.0398712	-0.0732706	0.0439815	-0.00209033	0.0587263	0.00901007	0.0281578	-0.0028792	-0.0401676	-0.0148644	-0.00461563	-0.0065943
V27	0.0050425	0.0466305	0.0662815	-0.0863049	0.0727849	-0.0570032	0.0627568	-0.0422008	-0.0900166	0.075883	0.0622222	0.0272957	0.0392499	0.00488887	0.0563813	-0.012011	0.0611131	-0.0126439	-0.107342	0.0291364	-0.00900677	0.0854731	-0.15948	-0.0201742	-0.0116561	-0.0421596	-0.0943832	0.0514758	-0.0255332	0.0430651	0.0416954	0.0527555	-0.0312733	0.0212908	-0.00822841	-0.0434895	-0.0136088	0.0249483	-0.0654791	0.0464924	-0.0243048	0.0632095	-0.00851211	0.0199213	-0.0137869	-0.0374954	-0.0239822	0.0309872	-0.00281519
V28	0.00382158	0.0431568	0.0737306	-0.0708005	0.0699656	-0.0573744	0.0812614	-0.0427649	-0.0868614	0.0665814	0.0218259	0.0910444	0.0335878	0.00472895	0.082912	0.00103517	0.0375811	-0.0102299	-0.0876556	-0.00271189	-0.0344836	0.0640776	-0.13955	-0.0137789	-0.00516741	-0.0844395	-0.123115	0.0375011	0.0226649	0.00487679	0.0232028	0.0666476	-0.0752234	0.0082547	-0.00178852	-0.0354159	-0.00192243	0.0364644	-0.0448455	0.019832	-0.0391527	-0.00265765	-0.0175641	-0.00759968	-0.0176841	-0.00417605	-0.0504035	0.0635204	-0.0588814
V29	0.00373334	0.0471819	0.0743688	-0.0635446	0.0711007	-0.042983	0.083727	-0.0306925	-0.0857486	0.00753995	-0.0075923	0.12076	0.0156163	-0.00181849	0.0967496	-0.0126254	0.000985599	0.014008	-0.0619518	-0.059393	-0.0173674	0.0929802	-0.0828559	-0.0290504	-0.0141365	-0.0953218	-0.108956	0.0512547	0.0829696	-0.0434717	-0.0169187	0.0144909	-0.100361	-0.0191162	0.00468401	0.00484927	-0.065813	0.00127218	-0.0328677	-0.00941657	-0.0156093	-0.0141067	-0.0543075	-0.0032927	-0.0222976	-0.0162194	-0.0299191	0.0648111	-0.0538546
V30	0.00197248	0.05386	0.0722669	-0.0586788	0.054179	-0.0349736	0.0880886	-0.0266231	-0.0391329	-0.0638901	-0.0181571	0.134037	0.00392011	-0.00998135	0.0858635	0.0158949	-0.00919893	0.0343095	0.00787708	-0.0664388	-0.0157273	0.103495	-0.0143813	0.00197031	0.00593732	-0.0502288	-0.124697	0.0486385	0.109064	-0.125998	-0.0200004	-0.00821993	-0.0872399	-0.025287	-0.0241748	0.0506222	-0.0575027	-0.0565463	-0.000680964	-0.02747	0.0378841	-0.0184633	-0.0435088	-0.0247796	-0.0293797	-0.0317118	0.0413311	0.0155869	-0.0299699
V31	-0.00211664	0.058453	0.0702613	-0.0525262	0.0228983	-0.0238639	0.0926769	0.00253597	-0.00960325	-0.117685	-0.0356918	0.104809	0.0104138	0.031557	0.0509833	0.0592446	-0.0448562	0.0302841	0.067505	-0.0274442	-0.0455576	0.0852488	0.0598674	0.0155121	0.021092	0.0102606	-0.0686503	0.00678843	0.109361	-0.149709	-0.0794401	-0.00848894	-0.0477361	-0.0323886	-0.00547502	0.0240109	0.014323	-0.0770241	-0.0182332	-0.043953	0.00364405	0.00432719	-0.0502035	-0.0291642	-0.0150221	-0.00896212	0.0420545	0.0336772	-0.032474
V32	-0.00374006	0.0595951	0.068108	-0.0522926	0.008856	-0.0186971	0.0723557	0.0202202	0.0139892	-0.137897	-0.0508247	0.0671343	0.00587944	0.0577209	0.00932958	0.0841064	-0.0604704	0.0748652	0.104293	0.0141571	-0.0535305	0.0639365	0.0924391	0.0344015	0.001113	0.0229563	0.000452469	-0.0122945	0.052571	-0.105219	-0.10889	-0.0256586	-0.04991	-0.0549583	-0.00257393	0.0226383	0.0658303	-0.0365241	-0.0260128	0.010109	-0.0585862	-0.0121686	-0.0331037	-0.017172	0.0434779	0.00644961	0.0792779	-0.00883362	-0.0031322
V33	-0.00133713	0.058209	0.075221	-0.0626315	0.00565722	0.00101876	0.0448447	0.00759371	0.0185838	-0.124417	-0.0263427	0.0195928	0.0127509	0.055333	0.00485872	0.0637077	-0.12261	0.102371	0.133274	0.00221597	-0.0643692	0.0578345	0.110796	0.0461515	-0.0423893	0.00908932	0.0617111	0.00439663	-0.0136511	-0.073732	-0.0988958	-0.0305185	-0.0465886	-0.0288076	-0.0164654	0.0247953	0.0551879	-0.0122881	-0.0385614	0.0635689	-0.0536034	-0.0129896	-0.0059775	-0.0358286	0.0488176	0.00603514	0.0804465	-0.0492792	-0.0270681
V34	0.00314983	0.0607802	0.0695872	-0.071793	0.0144501	-0.00132167	0.0271728	-0.0257911	0.022278	-0.0734698	0.00241918	-0.0260101	-0.00284265	0.0445039	-0.0271175	0.0594789	-0.155186	0.11596	0.124687	0.0287518	-0.0716537	0.0364908	0.112033	0.0512053	-0.0271349	-0.0221345	0.0770105	0.00518346	-0.061489	-0.0342899	-0.107655	-0.0179527	-0.0179567	0.0111771	-0.0511923	0.012115	0.0401931	0.0130251	-0.0462893	0.0975805	-0.0347711	-0.0105974	0.0195562	-0.0483563	0.0815227	0.0429817	0.0657823	-0.0636305	-0.0115896
V35	0.0170198	0.0651551	0.0534856	-0.0591893	0.0299702	-0.00256396	0.0223129	-0.0617539	-0.00828389	-0.0468584	0.0626666	-0.0458331	-0.00865501	-0.00402635	-0.050716	0.0340781	-0.139051	0.115828	0.0960136	0.0213087	-0.104793	0.00570391	0.0835366	0.0373483	-0.044688	-0.0242973	0.0860913	-0.00536318	-0.0827477	-0.0108462	-0.0781386	-0.0195082	0.00157889	0.0259376	-0.0509576	-0.0172185	-0.00242565	0.0193102	-0.0271916	0.0920953	-0.0182372	-0.00959073	0.0399587	-0.0536449	0.0681872	0.0159227	0.014308	-0.0734663	-0.0280497
V36	0.0304369	0.0608202	0.0291589	-0.042359	0.0339112	-0.0151939	-0.00376453	-0.0819404	-0.0337922	-0.0357511	0.0794122	-0.055325	-0.0292088	-0.0322555	-0.0525009	-0.000753031	-0.0948956	0.114179	0.0449427	0.0176474	-0.10536	0.00750303	0.0545354	0.0371853	-0.0439258	-0.0152783	0.0597184	-0.0171096	-0.0528514	0.00121564	-0.0486	0.00480226	0.00608053	0.0419052	-0.0453548	-0.0468364	-0.0474184	0.0276139	-0.0359944	0.0768258	-0.0333251	0.00791342	0.0403109	-0.0670351	0.0272006	0.0416209	-0.019649	-0.0200055	-0.0128203
V37	0.0389834	0.0535145	0.00995832	-0.0250785	0.0396595	-0.0183514	-0.0231408	-0.0834116	-0.0425083	-0.0177289	0.0575905	-0.0401027	-0.0357501	-0.0501179	-0.0356118	-0.0210741	-0.0577124	0.10359	0.00754307	0.0028574	-0.0878944	-0.006423	0.0188099	0.036372	-0.0362174	-0.0115155	0.0583132	-0.0210835	-0.0217386	0.00209225	-0.0297984	0.00108856	-0.00309096	0.0122616	-0.0293573	-0.0144666	-0.0613081	0.0238229	-0.034858	0.0692537	-0.00643687	0.0226342	0.012359	-0.0845229	-0.00128946	0.051601	-0.0134694	0.00782517	-0.00299267
V38	0.043143	0.0470339	0.000324482	-0.00827191	0.0360038	-0.026392	-0.0292146	-0.0852205	-0.0546506	-0.0148653	0.0449185	-0.0164034	-0.0239285	-0.0595352	-0.016808	-0.0367191	-0.0208128	0.0957955	-0.00318347	0.00289554	-0.0630951	0.000387932	0.00173359	0.0225393	-0.00262486	-0.0200454	0.0435837	-0.0216127	-0.00310582	0.00841533	-0.0198266	0.0213762	-0.00756566	-0.00818812	-0.00335706	0.0170584	-0.0575447	0.0513333	-0.0410829	0.0616049	-0.000854904	0.0255923	-0.0203532	-0.0676445	-0.0116545	0.0327155	0.0310311	0.0173651	0.0066738
V39	0.0455072	0.0436298	-0.00233101	-0.000102561	0.025701	-0.0318907	-0.0442106	-0.0672054	-0.0573585	-0.0122029	0.0291311	0.00969577	-0.0137683	-0.0549563	-0.012215	-0.0389217	-0.00853419	0.0735715	-0.00279319	0.00942037	-0.0534437	0.00208567	-0.00121729	0.0280017	0.0107269	-0.00394983	0.017969	-0.0338948	0.0141214	-0.00183786	0.00696307	0.00579974	-0.00745619	-0.00796218	0.0275548	0.0396295	-0.0494889	0.0566184	-0.0222281	0.0510202	-0.0119991	0.0337043	-0.0507046	-0.0513509	-0.0045694	0.0527966	0.0371569	0.00097116	0.0121662
V40	0.0461962	0.0429019	0.00196952	0.0145931	0.0142989	-0.0308095	-0.0563217	-0.0481217	-0.058793	0.000202385	0.00611377	0.0100291	0.00166303	-0.0501141	-0.00149677	-0.0294869	-0.00484723	0.0546552	0.00519691	0.000487516	-0.0557907	-0.0248184	0.00659911	0.0270189	0.0260274	0.00326384	-0.00276335	-0.0348175	0.0287341	-0.012069	0.0361547	0.0166334	-0.0291456	-0.00369132	0.0378976	0.0416007	-0.0395382	0.051192	-0.0480648	0.0274152	-0.00772217	0.0301242	-0.0543026	-0.0688789	0.0109457	0.0549312	0.0635144	-0.0197838	-0.00455728
V41	0.044044	0.0443977	0.0190018	0.0175786	0.00791393	-0.0453632	-0.0781929	-0.0329265	-0.0531039	0.00086344	-0.0256947	0.0127078	0.00741831	-0.0364675	0.0142215	0.00118738	0.00596149	0.0278079	-0.0142098	0.0130247	-0.0413634	-0.0357512	0.014035	0.0338852	0.0459181	0.0259881	-0.0144992	-0.043462	0.0416875	0.00188149	0.0400116	0.0479066	-0.0357324	0.00872989	0.0261043	0.0124786	-0.0268036	0.0501434	-0.036624	-0.00125607	-0.00297057	0.0416388	-0.0665309	-0.0942798	0.0409737	0.050715	0.0842248	-0.0201621	-0.022428
V42	0.0374515	0.0511701	0.0370121	0.0148019	0.00728712	-0.0527297	-0.0875792	-0.024074	-0.0405292	0.00640363	-0.0434226	0.019315	0.00867325	-0.00631922	0.0370802	0.049369	-0.00111905	0.019546	-0.0424868	0.0198961	-0.0358072	-0.05928	3.73021e-05	0.0455637	0.0365527	0.0480089	-0.0267026	-0.0457581	0.0228595	0.00864048	0.0707143	0.0632423	-0.0352705	0.0453042	0.0137629	0.0169698	0.0219865	0.0428335	-0.00340214	-0.0014155	-0.0142536	0.0286171	-0.0495841	-0.110347	0.0587984	0.0491704	0.108322	-0.0190526	-0.0209857
V43	0.0278408	0.0604	0.0594473	-0.00751532	0.0154708	-0.0516651	-0.0785017	-0.012737	-0.0324664	0.0157007	-0.0478316	0.0242885	-0.00470876	0.0184798	0.0517302	0.0748745	0.00946737	0.0155347	-0.0872653	0.00795305	-0.0338261	-0.0670279	0.00472257	0.0215285	0.0301091	0.0548417	-0.0499627	-0.0454096	-0.00637694	0.0450504	0.0705134	0.0613861	-0.0208207	0.0604359	-0.0231545	-0.00533144	0.0822421	0.00157232	-0.00938354	-0.0112203	-0.0135214	0.0209344	-0.0373501	-0.093268	0.0907193	0.0319723	0.0866429	-0.0310624	-0.0427347
V44	0.020722	0.0631649	0.075536	-0.0218627	0.0121325	-0.0277614	-0.0543215	-0.0240541	-0.00292135	0.026501	-0.0556439	0.0160657	-0.0287249	0.046628	0.0581418	0.0912421	-0.0263856	0.0180751	-0.126144	-0.0032258	-0.0370282	-0.0393025	0.0394876	0.00103819	0.00263049	0.0173467	-0.04557	-0.0408044	-0.0417136	0.0242891	0.0927863	0.045495	0.0335564	0.051259	-0.0508483	-0.0279902	0.0876077	-0.0280572	0.00792609	-0.0149278	-0.0241885	-0.0188949	-0.0303392	-0.0786393	0.0858942	0.00578904	0.0600569	-0.0525774	-0.0521798
V45	0.0193143	0.0673294	0.0678077	-0.0272807	0.0131679	-0.00896158	-0.015493	-0.0653098	-0.0110934	0.0163356	-0.0327681	0.0201215	-0.0451344	0.0238141	0.0728506	0.0860362	-0.0429961	0.0272466	-0.144974	-0.0113515	-0.0508876	-0.00148525	0.0489605	-0.0172517	-0.0354699	0.00914077	-0.031248	-0.0293699	-0.0534695	0.0170976	0.102414	-0.0293275	0.0907993	0.061155	-0.0735903	-0.0451861	0.0522642	-0.040944	0.0293283	-0.0472199	-0.0168527	-0.03345	-0.0143681	-0.0823083	0.0508616	0.0104095	-0.00481157	-0.061632	-0.0527076
V46	0.0226078	0.0693696	0.0416818	-0.014363	0.0227582	-0.000589569	0.0358783	-0.0914058	-0.0101595	-0.0111357	-0.00370282	0.0142504	-0.0592781	-0.036868	0.064344	0.0463656	-0.0254951	0.0513793	-0.142477	-0.00423341	-0.0664552	0.049297	0.0543122	-0.0771955	-0.0475231	-0.0362964	0.00978861	0.0200307	-0.0356918	0.0204047	0.0852287	-0.0946085	0.11686	0.0776922	-0.0865363	-0.0613356	-0.0218065	-0.0647358	0.0138226	-0.0387843	0.0178404	-0.0396111	-0.0457527	-0.0504874	0.0257035	0.00575274	-0.055574	-0.0680557	-0.0076607
V47	0.0283278	0.0645113	0.0177242	0.0148675	0.0172253	0.0111655	0.0681703	-0.104116	0.00741937	-0.0392995	0.00891108	-0.00326604	-0.0478701	-0.0739852	0.0461837	0.0251853	-0.0107552	0.0710921	-0.0845344	-0.00564703	-0.0480258	0.0783243	0.0570032	-0.0764532	-0.0302732	-0.0486575	0.0391069	0.049289	-0.0237243	0.00645242	0.0848187	-0.109866	0.0952101	0.0433053	-0.0565733	-0.0236674	-0.0458626	-0.0948832	0.0119296	-0.0233378	0.0505716	-0.0472282	-0.055904	-0.036028	-0.002937	0.0192944	-0.054394	-0.0438813	0.042811
V48	0.0323706	0.058203	0.0100221	0.043418	0.0125321	-0.00039792	0.0917402	-0.0946827	0.0159247	-0.0404665	0.00233286	-0.0106907	-0.0407353	-0.086568	0.0331376	0.0138984	-0.0156042	0.0561028	-0.0276049	0.00585339	-0.0149428	0.0753373	0.0424959	-0.0610573	-0.00904528	-0.0714152	0.0417717	0.0596326	-0.0102372	-0.00599116	0.0681411	-0.100192	0.0570897	0.0218711	0.0122802	-0.00609163	-0.0292288	-0.0648932	0.0246866	-0.0313527	0.0398161	-0.0658164	-0.060803	-0.0246595	-0.0215677	0.0405155	-0.0429258	-0.0274501	0.068847
V49	0.033628	0.0563681	0.00742921	0.0679212	0.0185253	-0.0101091	0.0998817	-0.0688815	0.00977166	-0.0565858	-0.00822986	-0.005522	-0.0264644	-0.0585924	0.0294694	-0.00145655	-0.0278034	0.0303547	0.0114498	-0.000113945	-0.00105662	0.0909356	0.016635	-0.0626503	0.0216774	-0.0759565	0.0552994	0.0562366	0.0222397	0.020526	0.0588025	-0.083933	0.0148804	0.0139922	0.0436359	0.0105382	-0.0210378	0.00266133	0.000760579	0.00512041	0.00435114	-0.0452218	-0.0525632	-0.00214664	-0.0225713	0.0391508	-0.0172058	-0.0107447	0.0743256
V50	0.034684	0.050711	0.00893418	0.0859351	0.0237027	-0.0162543	0.097277	-0.0455888	0.0239111	-0.0490771	-0.0322919	-0.0073566	-0.0218291	-0.0351708	0.00704434	0.012058	-0.0399208	0.0268218	0.0343399	0.0018428	0.019434	0.0873032	-0.0152639	-0.0227127	0.0617566	-0.0618971	0.0529208	0.0567884	0.0333087	0.0366145	0.0683336	-0.0482879	-0.0286435	0.00391641	0.0597798	0.0217071	-0.00355587	0.0547955	0.0066585	0.046439	-0.0228233	-0.0157438	-0.0493805	-0.011932	-0.021686	0.0241437	0.0289528	-0.0111935	0.0949664
V51	0.0321408	0.0508618	0.0183437	0.0986039	0.0274383	-0.0421325	0.0947153	-0.0257202	0.0228335	-0.0337732	-0.0320324	-0.00458165	-0.0275129	-0.00340569	-0.0122226	0.0367703	-0.0486292	0.00340348	0.0578748	-0.00511298	0.0360115	0.0607188	-0.0409365	0.00842081	0.0893577	-0.0352134	0.0394473	0.0396894	0.0391017	0.0288436	0.0599079	-0.0516058	-0.0287967	-0.0206778	0.0550375	-0.00377963	0.01132	0.0819185	0.00839696	0.0458379	-0.0434619	0.00832597	-0.0427903	-0.0581104	-0.0108188	0.00238528	0.00186456	-0.00670889	0.106872
V52	0.0294928	0.0521465	0.026902	0.0987251	0.0290573	-0.065401	0.0759793	-0.0202004	0.0207464	-0.00531929	-0.0356335	0.0286299	-0.0387303	0.0310813	-0.0488543	0.0446671	-0.036421	-0.0102585	0.0605272	0.00948111	0.0592692	0.0185806	-0.0719747	0.020645	0.10486	-0.0217003	0.0368168	0.0190342	0.0332296	0.0170924	0.0211551	-0.02269	-0.0296007	-0.0356127	0.0386419	-0.0146636	0.00999114	0.119896	-0.0126239	0.0668161	-0.0789061	0.0284835	-0.0292069	-0.0813274	0.0100245	-0.00491745	0.0087417	-0.0165752	0.0742367
V53	0.0255744	0.0545509	0.03769	0.0983582	0.0430114	-0.074613	0.0667155	-0.0148026	0.0127637	0.0143373	-0.0302422	0.0520304	-0.0392392	0.0585534	-0.0533962	0.0433967	-0.0112829	-0.0111024	0.0474961	-0.00212225	0.0441406	-0.0228474	-0.0803881	0.0289673	0.0793781	-0.000471496	0.0391541	-0.00325433	-0.00927101	0.0127534	0.0260726	-0.0191934	-0.0301813	-0.0280613	0.02308	-0.0381702	0.00428532	0.135926	-0.0303481	0.0657979	-0.0817015	0.010583	-0.0357462	-0.0580142	-0.0145303	-0.0246213	0.00192716	0.000378951	0.0346161
V54	0.0212474	0.0625107	0.0455843	0.0804487	0.0459086	-0.0700957	0.0475494	-0.0203589	0.0183104	0.0218933	-0.0192642	0.0706174	-0.020244	0.0728708	-0.0665593	0.017902	0.0136369	0.00574627	0.0268579	-0.015771	0.0665299	-0.0598066	-0.0865095	0.0215077	0.0698746	0.00881865	0.011012	-0.0382382	-0.0804877	0.00501448	0.0172804	0.0137904	0.0177993	-0.0273001	-0.0258343	-0.0436733	0.00896471	0.110336	-0.0682383	0.0696119	-0.0691697	0.0279441	-0.0664192	-0.0240296	-0.0414222	0.023704	-0.0182707	-0.0089652	0.00392963
V55	0.0184483	0.0673568	0.0549437	0.0591765	0.0371899	-0.0669082	0.0596266	-0.0224844	0.0225735	0.0085941	0.0186448	0.0720592	0.0297488	0.0430497	-0.0494386	-0.0252376	0.0224217	0.00617127	0.0196092	-0.0260123	0.0733127	-0.0697116	-0.0786526	-0.0116473	0.0317022	0.00284875	0.0114448	-0.0781898	-0.125445	0.00524062	0.019237	0.0132106	0.0245099	-0.0251105	-0.043312	-0.0108286	-0.0270608	0.0642743	-0.0419993	0.096897	-0.000480907	0.0295809	-0.101137	0.0447646	-0.0402192	0.0129332	0.024465	-0.0165244	-0.00549392
V56	0.0160845	0.0692805	0.0614292	0.051429	0.0366312	-0.0626086	0.0570902	-0.0211851	0.0293069	-0.00797537	0.00731067	0.0748098	0.05525	-0.0172074	-0.0427836	-0.0753092	0.0278384	0.0193841	0.0449318	0.000380687	0.0501288	-0.0622223	-0.0393859	-0.041441	0.0291559	-0.00366523	-0.0153311	-0.105012	-0.142094	-0.0183652	0.0100616	0.00615165	0.00678352	0.0136909	-0.0621062	0.000830813	-0.0828339	0.00420802	-0.0451218	0.0513529	0.0132237	-0.00336804	-0.0806015	0.0867686	-0.0282654	0.0124318	0.0175795	-0.0258576	-0.0084939
V57	0.0143972	0.0729535	0.0662044	0.0359909	0.0291007	-0.0474469	0.0335092	-0.036891	0.051282	-0.0397422	-0.0224453	0.0394051	0.0828383	-0.0356366	-0.0425154	-0.0736314	0.0199572	0.0086614	0.0700445	-0.0102122	0.0091321	-0.044638	0.00223989	-0.0689342	0.00021554	0.00608598	-0.0197748	-0.0982849	-0.11554	-0.0553445	0.0171743	0.0148649	0.0163971	0.05606	-0.0658853	0.0189146	-0.101549	-0.0331775	-0.0535218	0.0127543	0.0684807	0.00288069	-0.0347541	0.0725355	-0.0270517	0.0402565	0.00167124	-0.024617	0.00883879
V58	0.0124288	0.0706245	0.0694576	0.0167694	0.0171315	-0.0455508	0.0184316	-0.0543844	0.0611982	-0.0803255	-0.0187959	0.0189423	0.0794221	-0.0907577	-0.0425713	-0.0425085	0.0425124	0.0100152	0.0630766	-0.0141029	-0.0343637	0.0139467	-0.00188429	-0.0826568	0.00997404	-0.00521603	-0.0111153	-0.063227	-0.0751936	-0.0497164	-0.00606797	0.0667314	-0.00516888	0.0846998	-0.101875	-0.0135669	-0.102123	-0.0438647	-0.0336204	-0.0139668	0.104074	-0.00063421	0.0662907	0.0374856	-0.0362957	-0.00455847	-0.00735538	0.0324262	0.0208947
V59	0.0123487	0.0662724	0.0668799	0.00432153	0.00696318	-0.0391561	-0.00745609	-0.0656111	0.0692335	-0.0886766	-0.00447741	0.00263065	0.0971011	-0.109367	-0.045505	-0.00258951	0.0438627	0.0155261	0.0452504	-0.018219	-0.0309274	0.0800849	-0.0247732	-0.0605313	0.0128047	-0.0044954	-0.00419872	-0.0715896	0.00483727	-0.0500451	-0.0414791	0.0875777	-0.0242723	0.107876	-0.101084	0.00109633	-0.0766061	-0.0140276	0.00561938	0.0133934	0.129753	0.0341737	0.108047	0.0433631	-0.0445513	-0.0242936	-0.00225336	0.0799283	0.0308778
V60	0.0166235	0.0693305	0.0574082	0.00306385	-0.00321763	-0.000402768	-0.0292448	-0.0814757	0.076398	-0.065145	0.0115608	-0.0393427	0.0958867	-0.0881532	-0.0435081	0.00128559	0.0315346	0.0185683	0.0525594	-0.0449461	-0.00303585	0.0881011	-0.0428291	-0.0134004	-0.00394807	-0.0124606	-0.00112982	-0.0641776	0.0380093	-0.0458675	-0.0378504	0.0929352	-0.0582663	0.0899332	-0.0732777	-0.00874538	-0.0393211	0.0202352	0.0349958	0.0611946	0.100579	0.0772943	0.148352	0.0567149	-0.0544164	-0.0250047	-0.00313904	0.056196	0.0526052
V61	0.0255437	0.0653602	0.0395144	0.015179	-0.00272706	0.0109452	-0.0586494	-0.0747114	0.076231	-0.0554476	0.0261693	-0.0520704	0.0775881	-0.0810927	-0.0348132	0.0158019	0.0392703	-0.00794014	0.0458684	-0.0566195	0.044936	0.103397	-0.0131489	0.0135012	-0.0359279	-0.014618	0.0197548	-0.0872717	0.0662046	-0.0284184	-0.0470131	0.0541429	-0.0550215	0.0504053	-0.050755	-0.0432036	0.00982517	0.0665323	0.0407252	0.0870918	0.0292301	0.0757972	0.107668	0.0817021	-0.0235851	-0.0353155	-0.013876	0.0331307	0.059566
V62	0.0333463	0.0591192	0.0119893	0.051858	-0.00429992	0.0177964	-0.0579706	-0.065551	0.0717196	-0.0396471	0.0400394	-0.043958	0.066472	-0.0593925	-0.0492434	0.0234218	0.0283265	-0.0169141	0.0351734	-0.0458375	0.0476822	0.0827483	0.00749069	0.0392241	-0.0401318	-0.0353579	0.0191673	-0.0951121	0.0455999	-0.0373161	-0.0261743	0.0151938	-0.0298071	0.0182613	-0.0169439	-0.0187893	0.0566921	0.0700767	0.00800617	0.110537	-0.0284558	0.0317441	0.0263719	0.0822917	0.00898803	-0.0475371	-0.0174189	-0.00149992	0.030754
V63	0.0393469	0.0513344	-0.00845329	0.0666495	0.0100285	0.0124114	-0.0451708	-0.0515266	0.0544034	-0.0460753	0.0562916	-0.0325312	0.0459917	-0.0558891	-0.0413379	0.0178377	0.0447511	-0.0256138	0.0281876	-0.0290189	0.0430064	0.0468977	0.00594373	0.0192624	-0.0376558	-0.0295237	-0.00874418	-0.0777623	0.0299809	-0.0134711	-0.0151561	-0.0114772	-0.0178508	-0.00381646	0.0122886	0.00225511	0.0562185	0.0391715	-0.016932	0.104855	-0.0327415	0.0130157	-0.0100866	0.061916	0.020016	-0.0172709	-0.0189507	-0.000326057	-0.0018009
V64	0.0431693	0.0450527	-0.0177804	0.0745164	0.0170624	0.0120074	-0.0363675	-0.0289787	0.047321	-0.0443421	0.0489291	-0.0332346	0.0298327	-0.0385347	-0.0306569	0.00244155	0.0198136	-0.0104641	0.0204807	-0.0079407	0.042696	0.0211171	0.0229678	0.00630545	-0.0391531	-0.0321483	-0.0211764	-0.0627996	0.00327397	-0.0138911	-0.0166391	-0.00530077	-0.00140496	-0.0252185	0.0249834	0.00184755	0.0506866	0.00171777	-0.0199986	0.0815657	-0.0269353	-0.0255762	-0.0483008	0.0438011	0.0371639	0.00960163	0.00452589	-0.0184142	-0.0120875
V65	0.0446234	0.0419431	-0.0264779	0.0812034	0.0192983	0.00787637	-0.0277888	-0.0112429	0.0357333	-0.045211	0.0387807	-0.0250799	0.0206263	-0.0149347	-0.01322	-0.00926768	-0.000915141	-0.00562083	0.0143385	0.000242503	0.0338022	0.00692114	0.0198996	-0.00533514	-0.0311202	-0.0158617	-0.0427245	-0.0460531	-0.0119089	-0.00414593	-0.0190673	-0.000883303	0.0106082	-0.0202949	0.0316813	0.00211794	0.0350672	-0.0290563	-0.0211451	0.0391059	-0.0256024	-0.0314384	-0.0367262	0.0177854	0.0421174	0.0183656	0.0214058	-0.0113407	-0.0136075
V66	0.0454361	0.0393753	-0.0328109	0.0823298	0.0221269	0.00159884	-0.0188076	-0.00381185	0.0272785	-0.0445439	0.0308021	-0.0226447	0.0167019	0.0019596	-0.00264715	-0.0046814	-0.0112084	-0.00756282	0.0137865	0.0133575	0.0199791	0.0048849	0.0101419	-0.0061444	-0.0182737	-0.0150991	-0.0473442	-0.0219334	-0.0179157	0.0102432	-0.0223836	0.00729728	0.0180167	-0.00713159	0.0284383	-0.00547238	0.0198287	-0.0260232	-0.00490129	0.0154829	-0.0328134	-0.0181022	-0.0272461	0.0177316	0.0370649	0.0196849	0.0260617	-0.00837292	-0.00765508
V67	0.0458721	0.0358514	-0.0368127	0.08643	0.0222006	-0.00536637	-0.0137172	0.000966075	0.0171669	-0.0500407	0.0181453	-0.0263532	0.0146158	0.0119569	-0.0016116	0.00167262	-0.0167872	-0.000336	0.00961578	0.0193045	0.00525502	0.00614489	0.00317447	0.00988724	-0.00546624	-0.0161794	-0.0446521	-0.00486302	-0.0238806	0.019022	-0.0202011	0.0170364	0.010498	-0.000852221	0.0116792	-0.00985139	-0.00269643	-0.0281474	0.0056776	-0.00305878	-0.0332352	-0.00929465	-0.000437608	0.00474342	0.0346341	0.00600943	0.024917	0.004581	0.00250991
V68	0.0455946	0.0346843	-0.0378781	0.0896841	0.0223711	-0.0145545	-0.00815587	0.00390719	0.00734422	-0.0477699	0.00512052	-0.026478	0.0054528	0.014764	-0.00276519	0.00829618	-0.0256292	0.00277035	0.00676636	0.0225914	0.00462764	-0.00552546	0.00267447	0.0230696	-0.000402624	-0.0216781	-0.0504243	0.014944	-0.0277573	0.0128721	-0.0216404	0.0192888	-0.000763939	-0.00188865	0.00425268	-0.00889046	-0.022471	-0.0316131	0.018266	-0.0181042	-0.020767	-0.0105729	0.0210656	-0.00302845	0.0308228	-0.00864032	0.0189536	0.00958157	0.0262796
V69	0.0452591	0.0346784	-0.0353327	0.0927605	0.0257413	-0.0233941	-0.0101896	0.012219	-0.00410185	-0.0400284	-0.00371185	-0.0250773	0.00203077	0.0142655	-0.00525235	0.0112966	-0.0276298	-0.00116812	0.0148932	0.0221116	0.00178718	-0.0113257	0.00403131	0.0225525	0.000670107	-0.0256656	-0.0449246	0.0250097	-0.0240774	0.0103976	-0.0204481	0.0214344	-0.0233486	0.00199985	-0.00931298	-0.00917947	-0.0374152	-0.0148379	0.0297717	-0.0205011	-0.0254113	-0.0102057	0.0379568	-0.0163627	0.031689	-0.0204408	0.0136229	0.00788207	0.0250448
V70	0.0452348	0.0348164	-0.0305967	0.0949485	0.028553	-0.0290783	-0.014474	0.0203236	-0.0143422	-0.0234703	-0.00858571	-0.0212783	0.00104674	0.0173661	-0.00284258	0.0123613	-0.0268041	-0.00177126	0.013766	0.0214949	0.00255785	-0.0117591	0.00189668	0.0254846	0.00271386	-0.0341591	-0.0422783	0.0309877	-0.0256976	0.0127428	-0.0135055	0.0232721	-0.0402891	0.012279	-0.007074	-0.00446089	-0.0325028	0.00278793	0.0382974	-0.00485528	-0.0315897	-0.00474538	0.041845	-0.0165198	0.0262002	-0.0249625	0.00820622	0.00856834	0.0188548
V71	0.0442245	0.0376719	-0.0266958	0.0966401	0.0338612	-0.0332484	-0.0169165	0.034023	-0.0201236	-0.01225	-0.00463072	-0.0213608	-0.000184222	0.0137343	-0.000788571	0.00721435	-0.030138	-0.0079308	0.014234	0.0149807	-0.000252449	-0.0114815	0.00471557	0.0300034	0.000588815	-0.0374619	-0.0448142	0.0291554	-0.021703	0.0200116	-0.00431806	0.00472593	-0.0435397	0.00730043	0.0039297	-0.00309761	-0.0334154	0.000209915	0.0542472	0.00232686	-0.0282401	1.06842e-05	0.0433682	-0.0149704	0.017032	-0.0256505	-2.29633e-05	0.0162406	0.0111172
V72	0.0435258	0.0407814	-0.0194355	0.0967811	0.032416	-0.0417728	-0.0250868	0.0476155	-0.013413	-0.00425153	-0.00868507	-0.00718223	-0.00576724	0.0150907	0.00585187	-0.0100796	-0.0327754	-0.0194715	0.0201413	0.00623856	0.00550172	-0.0177117	0.00463645	0.0289979	0.000312008	-0.0420729	-0.0438293	0.0166956	0.00320906	0.0272908	-0.00262781	-0.0076927	-0.0521502	-0.00175856	0.00953163	0.0149143	-0.0202974	0.00426715	0.0456061	0.0200656	-0.015065	0.0229192	0.0386562	-0.00962121	0.000922547	-0.0201816	0.00931655	0.0274965	-0.0113856
V73	0.0413779	0.044521	-0.00643988	0.097667	0.0364137	-0.0577226	-0.0311615	0.0494876	0.000446934	-0.00272447	-0.0145988	0.00392505	-0.0249499	0.0173937	0.0253409	-0.0210082	-0.0317653	-0.0350172	0.0215454	0.0102751	0.0069237	-0.0174854	0.0130641	0.022303	-0.0106252	-0.0363654	-0.0533702	0.000931025	0.0288887	0.0288274	0.0122518	-0.0292315	-0.0584323	-0.00366803	0.0184218	0.0374442	-0.00108289	-0.0098044	0.0358375	0.0153622	-0.00820098	0.0187549	0.0342578	0.00525388	-0.0178447	-0.0213298	0.026843	0.0313181	-0.0275215
V74	0.0376058	0.050251	0.00834819	0.0943823	0.0423062	-0.0666913	-0.0428549	0.0391263	0.0234821	-0.00345758	-0.0307932	0.00918077	-0.0403946	0.0167698	0.0419818	-0.0196785	-0.027832	-0.054074	0.0319368	0.0208064	-0.00114371	-0.0218893	0.0233411	0.00801275	-0.012862	-0.0204919	-0.0721225	-0.00845371	0.0587335	0.0411398	0.010276	-0.0336515	-0.0386972	-0.00196904	3.32613e-05	0.04684	0.0192704	-0.0185553	0.000677643	-0.00813497	-0.00912563	0.0322613	0.0318617	0.0186238	-0.0404823	-0.00925338	0.0140757	0.021955	-0.0595626
V75	0.0335803	0.0535727	0.0238071	0.0865129	0.0348181	-0.0752912	-0.0544531	0.0353753	0.0502606	-0.0195699	-0.0351279	-0.00266136	-0.0467714	0.0147199	0.0594005	-0.00425121	-0.0295783	-0.0690621	0.0280374	0.0216176	-0.0214083	-0.0222582	0.0256389	4.17223e-05	-0.0237255	-0.0225056	-0.069928	-0.0235572	0.0752856	0.0588317	0.00198053	-0.00402465	-0.0257693	-0.00989084	-0.0298313	0.0349042	0.0452404	-0.0394579	-0.0278181	-0.0163756	0.031327	0.0696868	0.0124183	0.0177348	-0.0545555	-0.00236829	0.0400497	0.0143608	-0.0698043
V76	0.0277925	0.0593084	0.0358944	0.0823477	0.0215123	-0.0784719	-0.0532331	0.033124	0.0659094	-0.0198512	-0.0459398	-0.0183715	-0.0450202	-0.00920624	0.077447	0.0185101	-0.0198815	-0.0577008	0.0218877	0.0369081	-0.0270154	-0.0306144	0.0139705	-0.0149869	-0.0109854	-0.0444678	-0.0447801	-0.00796344	0.0744236	0.0560782	-0.0128725	0.0320115	-0.0309729	-0.0325592	-0.059665	0.0154397	0.0303612	-0.0607687	-0.0341687	-0.0478973	0.0643388	0.0786735	0.0136611	0.00285602	-0.0618052	-0.0117821	0.0723415	0.00115428	-0.0533201
V77	0.0212431	0.0621853	0.0425888	0.0857143	0.00376994	-0.0704344	-0.0598665	0.0248223	0.0968436	-0.0158724	-0.058075	-0.0484906	-0.0137959	-0.0172548	0.0893745	0.0355214	0.00677072	-0.0358938	0.022348	0.0372204	-0.0168434	-0.0577084	0.0151247	0.00243699	-0.0251066	-0.0504242	-0.0103418	0.00369886	0.0513413	0.0623057	0.0041166	0.0668197	-0.0102587	-0.0548888	-0.0515254	-0.00533725	0.0273111	-0.0300917	-0.0246959	-0.0745993	0.0546006	0.0687907	-0.0129649	0.0246119	-0.0738787	-0.0311744	0.0944567	-0.0237985	-0.0235911
V78	0.0174881	0.0668474	0.0399372	0.088553	0.00415765	-0.0627866	-0.0558649	0.0366733	0.101301	-0.00198931	-0.0572612	-0.0493338	0.0184411	-0.0216521	0.0623259	0.0554039	0.0323148	-0.00168344	0.0284517	0.0314237	-0.0153361	-0.0565343	0.00997821	0.0362038	-0.0280336	-0.0679328	0.0301057	0.0383904	-0.00474799	0.0539418	0.0352838	0.0636134	0.0119592	-0.0721729	-0.0461129	-0.0557994	0.017025	0.0043782	-0.00276948	-0.0941784	-0.00480607	0.0234015	-0.0472982	0.0327394	-0.0868799	-0.0727038	0.0800062	-0.0432689	-0.00390228
V79	0.0133797	0.0672637	0.037742	0.0901781	0.0199083	-0.063614	-0.0428691	0.0620141	0.0968658	0.031121	-0.053062	-0.0208443	0.0532759	-0.0467299	0.00439829	0.0711567	0.0588999	0.0592607	0.012112	0.0283567	-0.0172817	-0.0451759	0.0391586	0.0401866	-0.0271302	-0.0872811	0.0427312	0.0649706	-0.0141655	0.0297647	0.070672	0.0499554	0.0106294	-0.0910024	-0.0340842	-0.0505588	0.010773	0.0106893	-0.00902928	-0.0875075	-0.0254398	0.00348617	-0.0676326	0.0262645	-0.0634396	-0.101407	0.0474507	-0.00726056	-0.0374091
V80	0.0120588	0.068731	0.0407218	0.0774256	0.0278072	-0.0610514	-0.0405218	0.0641996	0.0791572	0.0518175	-0.0469294	-0.00232303	0.066981	-0.0489145	-0.0418687	0.0758204	0.0498224	0.0940019	-0.0115971	0.0330729	-0.0224727	-0.0353629	0.0616872	0.0547256	0.000741388	-0.0925025	0.0557066	0.0721239	-0.0166806	-0.00272947	0.104549	0.0465308	0.0288358	-0.0958996	-0.00222738	-0.0289673	0.00731761	0.0108515	0.0246454	-0.0741336	-0.0488903	0.00651581	-0.0775885	0.0117993	-0.0372591	-0.0349192	-0.00906981	0.0320699	-0.0725373
V81	0.0123822	0.0729127	0.039509	0.0568573	0.037981	-0.0598911	-0.0470221	0.0752313	0.0684738	0.0754894	-0.0174098	0.0147816	0.0617676	-0.0493582	-0.0624549	0.0645506	0.0277846	0.107056	-0.0164598	0.0491629	-0.0170352	-0.00135501	0.0828751	0.0156395	-0.0135049	-0.0627988	0.0674345	0.0618138	0.0238825	-0.0106409	0.105427	0.0308274	0.0387448	-0.0566803	0.0256515	-0.0418169	0.024676	-0.00124946	0.0348552	-0.0332346	-0.0421532	-0.00483617	-0.0351812	0.0079483	-0.0198355	0.0319477	-0.0299758	0.0773797	-0.0758007
V82	0.0125553	0.0733724	0.0335302	0.0418306	0.0414508	-0.0519812	-0.0503664	0.0791656	0.0554205	0.10853	-0.00211496	0.0283429	0.0645221	-0.0213447	-0.080936	0.0478305	-0.0129261	0.127922	-0.0282332	0.0525901	-0.0266497	0.0184371	0.0841181	0.0128871	-0.0276562	-0.0404284	0.0753142	0.0400931	0.0407971	0.00117059	0.0735915	0.0326785	0.0334411	-0.0107531	0.0701068	-0.0178456	0.0312353	-0.0210238	0.00244892	-0.006722	-0.0459446	-0.0199895	-0.0225497	0.0204578	0.0192685	0.0556251	-0.00914148	0.0715117	-0.111039
V83	0.0144441	0.0729873	0.0327041	0.0264612	0.0403232	-0.0664906	-0.0528819	0.0613962	0.051594	0.105157	0.0173624	0.0209786	0.0593195	0.00461577	-0.0931437	0.0421774	-0.0348086	0.100099	-0.0253303	0.0428302	-0.0280431	0.0638198	0.0512921	0.0221013	-0.0497226	-0.00666621	0.057491	0.0408287	0.102689	0.0341918	0.0415293	0.0167643	0.0457082	0.0600437	0.0965644	0.0295418	-0.0107511	-0.0190706	-0.00978548	0.00499355	-0.0442894	0.0234485	0.0617953	0.0187852	0.00426672	0.0385881	-0.0204492	0.0997709	-0.134371
V84	0.0175606	0.0659751	0.0484656	0.0228219	0.0452273	-0.0720323	-0.0425189	0.0233509	0.0742257	0.0877479	0.0362523	-0.0486235	0.0245605	0.0223699	-0.109687	0.0468302	-0.0429909	0.0510158	-0.0260327	0.0484583	-0.011216	0.049394	0.0233243	0.0411764	-0.0638765	0.00670957	0.0531337	0.00963804	0.141643	0.0346805	0.0171695	0.0311519	0.0244138	0.101992	0.0771225	0.0509137	-0.0286624	0.0109709	0.000306249	0.0200815	-0.0114757	0.030252	0.0623583	0.0387193	-0.0171411	0.0545259	-0.0479662	0.0304454	-0.145945
V85	0.0203611	0.0648135	0.0485836	0.0358495	0.0380595	-0.0698645	-0.0297782	0.00205647	0.0703868	0.0755495	0.0213942	-0.0761664	-0.00417026	0.0352462	-0.10569	0.0223839	-0.0233621	0.0147249	-0.032238	0.0283214	0.0199267	0.0185446	-0.0117536	0.0223396	-0.0719137	0.0476938	0.0655403	-0.0333095	0.154618	0.0111261	-0.00458144	0.0366385	-0.00619069	0.134717	0.0428144	0.0672852	-0.0372796	-0.000489634	-0.0354286	-0.00309894	0.0498267	-0.0254842	0.0789731	-0.0131647	-0.0392681	0.069542	-0.0539515	-0.0318823	-0.108533
V86	0.0234667	0.0659005	0.0502066	0.0340824	0.0305068	-0.0648774	-0.0128792	-0.00956672	0.0751997	0.0466288	0.022613	-0.0797075	-0.0298765	0.00515859	-0.0644365	-0.000645079	0.0134169	-0.0316462	-0.0146283	0.0429524	0.0833618	-0.00378267	-0.0363004	0.00531579	-0.0712039	0.0663886	0.074657	-0.0219068	0.124983	0.00322856	-0.0213097	0.0325781	-0.0227002	0.136378	-0.00274834	0.0124052	0.0129205	0.01598	-0.0396666	0.000941606	0.0605002	-0.0744226	0.0688253	-0.0462828	-0.0525008	0.0630604	-0.0151462	-0.0853997	-0.0986263
V87	0.0268778	0.0619771	0.040039	0.0329146	0.0265182	-0.0693714	-0.0132326	-0.00624295	0.0662588	0.0223091	0.037658	-0.062603	-0.0503855	-0.0270201	-0.0620061	-0.0404034	0.0604889	-0.039755	-0.00584986	0.0659994	0.10142	0.0247039	-0.0534157	-0.00318195	-0.0649859	0.0803604	0.0968219	-0.0101044	0.08874	-0.0111598	-0.0293047	0.017526	-0.0380427	0.122922	-0.0289367	-0.0208242	-0.0041435	0.0238266	-0.0382207	0.00496079	0.0465066	-0.0974101	0.0513609	-0.0932605	-0.0487742	0.0329039	-0.00314884	-0.127818	-0.0692549
V88	0.0280242	0.0647614	0.028153	0.0336489	0.0170171	-0.075329	0.000541159	-0.00765598	0.0623948	-0.0144248	0.0415918	-0.0155163	-0.0636558	-0.0453618	-0.0329477	-0.0718076	0.0854998	-0.0579339	0.00238929	0.0538042	0.112383	0.0172167	-0.0436064	0.00645636	-0.048991	0.0852537	0.0854801	0.0275857	0.0652149	-0.0236312	-0.03223	0.00355592	0.0187704	0.0589557	-0.0458845	-0.0266853	-0.00487738	0.00364885	-0.0408786	-0.00553411	0.0501997	-0.12834	0.0134861	-0.105798	-0.0714373	0.0170063	-0.00980503	-0.109525	-0.0167114
V89	0.0288409	0.0659189	0.014544	0.0438107	0.0190858	-0.0741562	0.00269846	0.00536449	0.0652469	-0.0453624	0.0319391	0.0460104	-0.0510639	-0.0724471	-0.0283314	-0.0959647	0.0809848	-0.0427432	-8.96696e-05	0.0332162	0.0802863	0.0272987	-0.0270332	0.0215	0.000147894	0.0977661	0.0305818	0.0464371	0.0674215	-0.036071	-0.0180528	0.00278824	0.050466	-0.0157641	-0.0855888	-0.0152066	-0.0289662	0.0132712	-0.014477	-0.0196347	-0.00278302	-0.121155	-0.0150262	-0.0971125	-0.0674991	0.0197021	-0.00138734	-0.0747027	0.00970312
V90	0.0285539	0.0655819	0.00757426	0.0616102	0.0216513	-0.0752679	0.00847505	0.0136152	0.0508373	-0.0548076	0.0194237	0.0876934	-0.0431225	-0.0551258	-0.00577134	-0.0839414	0.0704872	-0.0229995	0.011592	0.0164302	0.0534651	0.0468189	0.00787669	0.0321859	0.0426943	0.109104	-0.0240297	0.0419476	0.0624836	-0.0222069	-0.0048603	0.00980858	0.0349118	-0.0808038	-0.0875227	0.00327311	-0.00729699	0.0118119	-0.00782124	-0.0428748	-0.0549759	-0.0827025	0.00271608	-0.0635591	-0.0684815	0.0284212	-0.0387626	-0.058508	0.0386864
V91	0.026828	0.0662556	0.00477554	0.0757492	0.0270767	-0.0682741	0.0136443	0.0277277	0.028963	-0.0486389	0.0106679	0.0908486	-0.0372482	-0.0466384	-0.00989554	-0.0694909	0.0267184	-0.0150941	-0.00128195	0.0178138	0.00713824	0.0757993	0.0329404	0.012353	0.0648582	0.118047	-0.074747	0.0418432	0.0532076	-0.00214955	-0.0313033	0.009707	0.0306647	-0.118141	-0.0702709	0.0325441	-0.0114251	0.0210876	0.0207823	-0.0582022	-0.0776929	-0.0346115	0.0146201	-0.0309706	-0.036658	0.0291999	-0.0964117	-0.0541496	0.0429813
V92	0.0261996	0.0654219	0.0093072	0.0914194	0.0232196	-0.0587935	0.0327874	0.0484912	0.0180501	-0.0406634	-0.00711839	0.0722452	-0.0278334	-0.0379059	-0.0150344	-0.031467	0.0068074	-0.0049524	-0.00858464	-0.014994	-0.0345324	0.0686537	0.0545183	-0.017921	0.0698844	0.105401	-0.0929342	0.0282791	0.039783	0.014395	-0.048793	0.0189381	0.0416004	-0.121804	-0.0574023	0.0441829	-0.0145994	0.0237292	0.0493292	-0.0614987	-0.0326757	0.0417666	0.0316471	-0.00799943	-0.0150751	0.0643849	-0.128804	-0.0539602	0.0258084
V93	0.0257066	0.0645958	0.0113582	0.100536	0.0113463	-0.0603061	0.033364	0.0621829	-0.00185244	-0.043545	-0.0116531	0.0466936	-0.0355706	-0.0214337	-0.0254563	-0.00163602	0.00648604	0.0182667	-0.027893	-0.015757	-0.0706902	0.0433801	0.0442784	-0.0496303	0.0669741	0.0725248	-0.0870093	0.0155885	0.0103691	0.0146813	-0.0561067	0.0311432	0.0379417	-0.102343	-0.0582039	0.0587347	-0.00896438	0.049466	0.0702514	-0.0637598	0.00121072	0.0677754	0.04013	-0.00449807	0.00263413	0.045334	-0.136567	-0.071015	0.0498002
V94	0.0234878	0.0669342	0.0141808	0.104542	0.000843943	-0.0507212	0.041812	0.0713294	-0.0184326	-0.0275725	-0.0181168	0.0125167	-0.0130563	0.00536569	-0.0372482	0.0297823	0.00113148	0.0526185	-0.0385407	-0.00218692	-0.0851836	0.0218693	0.0124577	-0.0739005	0.0566021	0.0503205	-0.0780227	0.0148621	0.00304133	0.0501271	-0.0527161	0.036153	0.0414147	-0.056736	-0.0515919	0.0740461	0.00673017	0.0824639	0.0719678	-0.0695883	0.0200604	0.0640535	0.0539573	0.0184631	0.0228568	0.0133277	-0.125638	-0.062996	0.0605336
V95	0.02243	0.067986	0.0213989	0.0969654	0.00344302	-0.0422331	0.0488278	0.0755994	-0.0143902	-0.0153633	-0.0176385	-0.030091	0.00439711	0.0292256	-0.0474309	0.0523474	-0.00222519	0.0672183	-0.0510099	-0.0134546	-0.0897565	-0.0093879	-0.0329993	-0.0877121	0.0336848	0.0258402	-0.0593663	0.00940695	-0.00359158	0.102956	-0.0484404	0.0312718	0.0545251	-0.0135507	-0.0380415	0.0612751	0.0472938	0.0779306	0.0633924	-0.0544797	0.035012	0.0502279	0.0371838	0.0441199	0.022257	-0.00792664	-0.090811	-0.0177468	0.0590197
V96	0.0223987	0.0717637	0.0293026	0.0726596	1.58166e-05	-0.0432589	0.0370685	0.0668932	-0.013065	-0.00677589	-0.0084878	-0.0604388	0.00900478	0.047287	-0.071147	0.081172	-0.000297333	0.0646577	-0.0485201	-0.033701	-0.0624572	-0.0423615	-0.0755011	-0.108614	0.0318641	-0.0106951	-0.0317933	0.0252827	-0.0166711	0.0827247	-0.023773	0.0141933	0.0280896	0.014742	-0.037866	0.0577687	0.0775174	0.055344	0.0396522	-0.043695	0.0382741	0.000744261	0.0114825	0.0564033	0.0251828	-0.00177167	-0.0435805	0.0365176	0.0554756
V97	0.0232954	0.0687198	0.0365938	0.04308	-0.00662694	-0.0400204	0.0202665	0.0734243	0.00803241	-0.0143681	-0.0107939	-0.0671779	-0.00351832	0.0561323	-0.0858826	0.0886999	0.0110131	0.0495617	-0.0405623	-0.0652792	-0.0222696	-0.0589829	-0.109875	-0.123908	0.000606907	-0.0242703	-0.0345691	0.0184333	-0.0284083	0.0582915	0.00198773	-0.0018261	-0.0156272	0.00783493	-0.0190784	0.00766163	0.130222	0.0206999	0.0181236	-0.0470194	0.0509063	-0.0544278	-0.0134663	0.0611385	0.057455	0.0379277	-0.0182695	0.0964756	0.0265901
V98	0.0251953	0.070783	0.0330463	0.0227342	-0.0272947	-0.0352851	0.00794941	0.0647868	0.0193179	-0.0338729	0.00453666	-0.0571681	-0.016088	0.0659126	-0.0689974	0.0815173	0.023708	0.0114099	-0.0230503	-0.0779845	0.0280979	-0.0466991	-0.118474	-0.11687	-0.0123304	-0.0294808	-0.0159447	0.0208873	-0.0234443	0.0156343	0.00434801	-0.0249379	-0.0168505	0.00304868	0.00102128	-0.0150557	0.135057	-0.00873157	-0.0369368	-0.0112741	0.0315749	-0.11141	-0.0570288	0.0566603	0.0502786	0.0375973	0.0451436	0.086678	0.0212465
V99	0.0242314	0.071794	0.0355943	0.00921196	-0.0312731	-0.0434739	0.00821766	0.0694088	0.0280953	-0.0532274	0.0171324	-0.0373535	-0.0193382	0.0898029	-0.0499429	0.0354197	0.0426973	-0.00608972	-0.0124885	-0.070471	0.0616767	-0.0357868	-0.0958675	-0.0983274	-0.0440429	-0.0270228	-0.00755471	0.0421621	-0.0233558	0.00590184	-0.00824872	-0.0243359	-0.0515377	-0.03304	0.0151979	-0.0275749	0.0776683	-0.0569828	-0.112806	0.00907488	-0.0139428	-0.150371	-0.0327505	0.0488404	0.0454689	0.0146237	0.0838053	0.0605942	-0.0111882
V100	0.0237323	0.0715448	0.0395833	0.00256774	-0.0365924	-0.0593786	0.00932739	0.068146	0.0159226	-0.0690326	0.0214523	-0.0143547	-0.0333441	0.0925187	-0.0305009	0.00255177	0.0604484	-0.0284513	-0.0158394	-0.0627715	0.058149	-0.0240692	-0.0630936	-0.0484465	-0.066775	-0.0296172	0.0110514	0.0407877	-0.0231047	-0.0513606	-0.0361291	-0.0210511	-0.020912	-0.0813489	0.0253501	0.00491183	-0.0383333	-0.0813167	-0.11012	0.00258805	-0.0889967	-0.120324	-0.0330685	0.0365866	0.0009602	0.042494	0.0808754	0.0317648	-0.0393456
V101	0.0214974	0.0747852	0.0443531	0.0066445	-0.0371701	-0.0673652	0.0187915	0.0688906	0.0179327	-0.0485614	0.0223771	-0.0181225	-0.0445189	0.101902	-0.0235177	-0.0205964	0.0793832	-0.0316414	-0.00089342	-0.0416371	0.0343602	-0.0123744	-0.0180798	-0.023775	-0.0570324	-0.0148118	0.0127828	0.0300565	-0.0357132	-0.0792635	-0.0349376	-0.0211339	-0.0032011	-0.0945697	0.0188374	-0.014077	-0.0759803	-0.0542176	-0.0733108	0.00835297	-0.108151	-0.0540978	0.00833131	-0.0100322	-0.0395834	0.0824544	0.0182361	-0.00727348	-0.040322
V102	0.0193071	0.0759996	0.0507684	0.0159535	-0.0259744	-0.0736937	0.0131221	0.0665306	0.00974198	0.0210722	0.0234055	-0.0306039	-0.0449693	0.103173	0.00408607	-0.0483412	0.0879467	-0.0129564	0.000213258	-0.0166377	0.0305059	-0.026808	-0.000221367	0.0149231	-0.0369567	-0.0256958	0.0352151	-0.00758891	-0.0805657	-0.0932507	-0.0250043	-0.00853189	-0.00764261	-0.0706005	0.0235303	-0.00882711	-0.0770592	-0.0188557	-0.0336588	-0.0105443	-0.0800849	-0.0185791	0.00851387	-0.00587393	-0.0418103	0.125706	-0.00350054	-0.0308618	-0.0477067
V103	0.0178542	0.0762207	0.0515076	0.0132304	-0.0273573	-0.0826417	-0.00114737	0.0550871	-0.00987848	0.0513693	0.0239108	-0.0306735	-0.0274403	0.0964686	0.0170259	-0.0744722	0.0882005	-0.00674487	-0.0170317	0.00788826	0.0362707	-0.0123874	0.00230619	0.0320718	-0.0150892	-0.0289035	0.0602346	-0.0139729	-0.110572	-0.0766143	-0.0336656	-0.0252137	0.00583687	-0.0374742	-0.00569667	0.00142604	-0.066351	-0.0178606	-0.00296849	-0.000944644	-0.0340042	-0.0100478	0.0439233	-0.00769986	-0.0113129	0.0806295	-0.0363478	-0.0399334	-0.0174146
V104	0.015086	0.0747549	0.0587403	-7.86146e-05	-0.0160792	-0.0909477	-0.00853798	0.0282069	-0.00441062	0.0857958	0.0338466	-0.0411214	-0.0384258	0.0828125	0.0178512	-0.0931104	0.0726704	-0.00728558	-0.0369548	0.039364	0.0331404	-0.01474	0.0285418	0.0451811	0.00599148	-0.0565321	0.0424082	-0.00270432	-0.0866911	-0.0447987	-0.0268156	-0.0391557	0.00315091	-0.000463759	-0.0264458	0.0198878	-0.0570421	-0.0279087	0.041614	0.0103626	0.00928583	0.0112271	0.051138	0.00419003	0.000832834	0.0299827	-0.0386729	-0.0483225	0.01841
V105	0.0115641	0.0723058	0.0616389	-0.0147795	0.000832168	-0.0937387	-0.0274884	-0.00389989	-0.00662608	0.110543	0.0256104	-0.0502703	-0.034309	0.100516	-0.007639	-0.0922814	0.0430333	-0.0145256	-0.0355266	0.0502448	0.0386106	-0.0273294	0.0646388	0.0415682	0.0180906	-0.0549899	0.0104967	0.00355816	-0.0651802	-0.0148096	-0.00663559	-0.0468322	0.0156731	0.0280491	-0.0282631	0.0508356	-0.0659087	-0.0402076	0.0468355	0.0301217	0.0477775	0.0350523	0.0577066	0.0345183	0.0314853	-0.0230205	-0.0265332	-0.00283632	0.0697624
V106	0.00863965	0.0702985	0.070301	-0.0253022	0.018439	-0.0781578	-0.035874	-0.0251097	-0.00181505	0.130056	0.0135461	-0.0420919	-0.031294	0.0937151	0.000999641	-0.0657753	0.0101168	-0.0286365	-0.0366726	0.0235829	0.0376641	-0.0496129	0.0960096	0.0415576	0.038397	-0.0559958	-0.0308401	-0.000142045	-0.0269239	0.0188027	0.0204231	-0.0270598	-0.00829974	0.00856531	-0.0391511	0.0532202	-0.00969152	-0.0545552	0.0254928	0.0469544	0.0453308	0.00980613	0.0576273	0.0483704	0.0426892	-0.0675176	0.00468902	0.00968433	0.10047
V107	0.00540645	0.0638999	0.0699423	-0.0312913	0.0344196	-0.0499439	-0.0578029	-0.0341445	0.0148252	0.159321	0.00768233	-0.0220548	-0.0512562	0.0934427	-0.0051397	-0.0442095	-0.0146872	-0.0458724	-0.0396816	-0.0134106	0.0464572	-0.0372541	0.117672	0.0137097	0.0573839	-0.0250764	-0.0690548	-0.00468607	0.0137283	0.0417221	0.0324839	-0.0189638	-0.0635826	-0.025478	0.0149323	0.0303408	-0.00253576	-0.0669242	-0.0168057	0.0678046	0.0245298	0.00683185	0.0521352	0.0610111	0.0372474	-0.0955141	0.0391346	-0.017473	0.128066
V108	0.00572286	0.0561172	0.0709608	-0.0408785	0.0282512	-0.0137198	-0.0590389	-0.0426857	0.0313367	0.163403	-0.0118037	0.0109223	-0.0802076	0.0890223	-0.0183656	-0.0137668	-0.00433703	-0.0662104	-0.000601242	-0.0646237	0.0487001	-0.0301509	0.110744	-0.00986542	0.0310326	0.0458825	-0.0801105	-0.00169967	0.0578761	0.0898313	0.00339357	-0.0396922	-0.0717154	-0.0782564	0.0727933	-0.0262701	-0.022344	-0.0792955	-0.0509175	0.0517287	0.033845	0.0274094	0.0329139	0.0434326	0.018903	-0.0848441	0.049039	-0.0146819	0.129549
V109	0.00984819	0.0531219	0.0737403	-0.0458309	0.0147868	0.0137197	-0.057006	-0.0361117	0.0566114	0.12955	-0.0247186	0.0518418	-0.102059	0.0751784	-0.016285	-0.0271724	0.00556103	-0.0700624	0.012813	-0.118089	0.00686664	-0.0151954	0.109511	-0.0283277	-0.0211614	0.0764377	-0.0876663	-0.0162569	0.0650084	0.0589313	-0.0120515	-0.0579801	-0.0173274	-0.0795026	0.124742	-0.0444774	-0.0451567	-0.0387782	-0.0177442	0.0571865	0.0451181	0.0396517	-0.0109733	-0.00370026	-0.00291458	-0.0405936	0.0225556	-0.0208716	0.0894769
V110	0.0110209	0.0510284	0.0649378	-0.0436768	0.004265	0.0371686	-0.0575991	-0.0314565	0.0708333	0.109198	-0.0454061	0.0964233	-0.103089	0.0444443	0.0114999	-0.0235761	0.0960394	-0.0494244	0.083023	-0.145236	-0.0403858	-0.00912667	0.0766723	-0.0462423	-0.0705716	0.0958342	-0.0708009	-0.022922	0.0367348	0.0440367	-0.0274653	-0.0414704	0.0172942	-0.0720799	0.114239	-0.0860409	-0.0263715	0.0265421	-0.00800168	0.0158887	-0.020983	0.0205956	0.000228523	-0.0534997	-0.0408878	0.0164272	0.00905693	-0.027407	0.064042
V111	0.00708283	0.0522581	0.0558144	-0.0596138	-0.0284892	0.0471609	-0.0730892	-0.0372963	0.072008	0.0909956	-0.0566334	0.117571	-0.0764712	0.0328335	0.0355385	-0.0130422	0.108822	-0.0333963	0.124638	-0.114055	-0.0862209	0.0291717	0.0309386	-0.0639539	-0.0494987	0.0472079	-0.0158262	0.00185297	0.00640829	0.0644117	-0.0790455	-0.0134583	0.0526547	-0.0409281	0.115671	-0.0637101	0.0094869	0.0998834	0.00561722	-0.0125406	-0.0467133	-0.00769945	0.00555647	-0.0870929	-0.0303272	-0.00441349	0.00554992	-0.00909126	0.0529987
V112	0.00673713	0.0603077	0.0528191	-0.0733248	-0.0334376	0.0408063	-0.0656687	-0.0249849	0.0714126	0.0794333	-0.0430466	0.105591	-0.0277115	0.00537868	0.0335764	0.0156345	0.125065	0.01592	0.110718	-0.0957189	-0.0991616	0.0504132	-0.000770726	-0.0627819	-0.0432312	-0.0044782	-0.0012681	0.009073	-0.0385455	0.061577	-0.0612945	0.0262708	0.074977	0.00874563	0.10431	-0.0118135	0.0485578	0.0923746	0.0441581	-0.0158774	-0.0695252	-0.0210528	0.046792	-0.0671062	-0.016136	0.0173135	0.0115701	0.0029031	0.0244895
V113	0.00675484	0.0664186	0.0494454	-0.08033	-0.0298481	0.0202415	-0.0831832	-0.0278425	0.0678222	0.0684893	-0.00734838	0.0780782	0.00583941	-0.000986757	0.0395415	0.0270897	0.115125	0.0423267	0.102874	-0.082529	-0.0816672	0.0556615	-0.0388082	-0.0384116	0.0112696	-0.0617759	0.0155639	-0.0255553	-0.0765909	-0.00820638	-0.0466663	0.00872586	0.0540581	0.0769129	0.0819829	0.0266127	0.0529254	0.105861	0.063553	-0.0241119	-0.0667494	-0.0516257	0.0146174	-0.0310889	-0.0020198	0.00128076	0.00939395	0.0106378	0.0132405
V114	0.010595	0.0683707	0.0454784	-0.0747992	-0.0253395	0.0060769	-0.107875	-0.0319224	0.0477979	0.062099	0.00755126	0.0615455	0.0267061	0.032132	0.0244947	0.0273887	0.0723609	0.057309	0.0810245	-0.0845376	-0.0321235	0.0476486	-0.0681886	-0.0102531	0.052306	-0.0712485	0.0115542	-0.0696087	-0.0412672	-0.0661155	-0.0216839	-0.0090943	0.00872879	0.09351	0.0612161	0.0524148	0.0867997	0.107057	0.0828376	-0.0176211	-0.0384621	-0.0616227	-0.0220757	0.0152053	0.0137753	-0.0228872	-0.0319737	0.00268948	8.62828e-06
V115	0.0133915	0.0732247	0.0471089	-0.0558702	-0.0196629	-0.00131395	-0.102527	-0.0372196	0.0361179	0.0546547	0.0126482	0.0489654	0.0120063	0.0792405	0.0361563	0.038182	0.00834187	0.0594824	0.021331	-0.0690252	0.0130608	0.0272987	-0.071093	-0.0112986	0.0927957	-0.0542958	0.00988949	-0.0776645	0.019504	-0.102779	-0.0310351	-0.0246629	-0.0331459	0.0786455	0.0352036	0.0381508	0.080481	0.0825758	0.0637068	-0.0133088	0.0374704	-0.0424757	-0.0404448	0.0442937	0.014379	-0.0346597	-0.0478043	-0.00435238	-0.000782819
V116	0.0152854	0.0738101	0.0471059	-0.039773	-0.0119904	0.00202779	-0.104975	-0.0595724	0.0142413	0.0355329	0.0108299	0.0439575	-0.0156328	0.0775042	0.0284076	0.0396663	-0.035565	0.0604868	-0.0402363	-0.00912641	0.00716579	-0.043088	-0.0528716	0.0217856	0.127651	-0.0430834	0.0271545	-0.0731771	0.060038	-0.127529	-0.032972	-0.0352169	-0.034491	0.0444376	-0.00495538	0.0537177	0.0400528	0.0437276	0.031228	0.00550841	0.0535738	-0.0187773	-0.0431893	0.0832385	0.0110517	-0.0218284	-0.0476792	-0.0329843	0.00879091
V117	0.0191714	0.068429	0.0451782	-0.0305477	0.0059352	0.00806068	-0.0986996	-0.0568524	0.00157046	0.019777	-0.0060791	0.0609923	-0.0546226	0.0713669	-0.00387585	0.0366474	-0.0692546	0.0560151	-0.066488	0.0162527	0.00641913	-0.0887338	-0.0487989	0.0465076	0.1387	-0.0424627	0.029563	-0.0513254	0.0845689	-0.129021	-0.0795994	-0.0404992	-0.0179098	-0.0103685	-0.0316303	0.0147347	0.00282407	0.0185838	0.0231499	0.00153686	0.0700609	0.00306651	-0.039493	0.0897746	0.0134479	-0.00122748	-0.0357081	-0.0061241	-0.00921192
V118	0.0275256	0.0660091	0.0373359	-0.0203133	0.00952632	0.0337673	-0.0639736	-0.0467046	0.00321958	-0.00713927	-0.0231345	0.0575988	-0.0920402	0.0326284	-0.0275049	0.0422696	-0.0476899	0.0639309	-0.0638515	0.00254192	0.00376289	-0.0916107	-0.0797641	0.0822879	0.126906	-0.0323556	0.00531348	-0.00566262	0.0583711	-0.0924569	-0.0751326	-0.0257506	0.0321482	-0.0468884	-0.0172434	-0.0182246	-0.0429442	-0.00996124	0.0249481	0.0209318	0.0853788	0.019528	-0.0123761	0.0604211	0.0110671	0.00675479	-0.0144106	0.0145223	-0.0154413
V119	0.0326802	0.0628727	0.0327513	-0.00818724	0.00966521	0.0421443	-0.0485105	-0.0435978	0.0131862	-0.0154674	-0.0261099	0.03377	-0.0926844	0.0265339	-0.0285394	0.0305446	-0.0106257	0.0530149	-0.052307	-0.00608466	-0.00448864	-0.0660241	-0.0892088	0.1107	0.110855	-0.00392134	0.0234691	0.0279131	0.0132223	-0.0348725	-0.0665823	-0.00668066	0.0844086	-0.0707126	0.00780111	-0.0310148	-0.0606749	0.00683931	0.0579001	0.0486087	0.0693362	0.0199609	0.00414038	0.014955	0.00993145	0.00732309	-0.0192857	0.0344077	-0.0165125
V120	0.036155	0.0613402	0.0313645	-0.00380895	0.00151131	0.0318812	-0.0307922	-0.0477378	0.00458256	-0.0344247	-0.00384147	0.0102481	-0.0667157	0.00422352	-0.00982106	0.0250141	0.0544397	0.0278485	-0.0370093	-0.0401918	-0.0266039	-0.0321991	-0.0932062	0.0909298	0.0645637	-0.00171723	0.0487546	0.0519737	-0.0146308	-0.0142579	-0.0532605	-0.00767067	0.132746	-0.0544174	0.0103694	-0.0213185	-0.0789194	-0.019965	0.100416	0.0368299	0.0610546	0.00258244	0.00655728	0.010782	-0.00921336	-0.0169371	-0.0332901	0.038012	-0.012961
V121	0.0348844	0.0614428	0.0317791	-0.00912101	-0.0176529	0.0301189	-0.00311514	-0.0516126	0.0108651	-0.0682772	0.00661386	-0.0132892	-0.0225298	-0.00359407	0.00568102	0.0334691	0.100218	0.0051427	-0.0238744	-0.0626532	-0.0519352	-0.00635474	-0.0821592	0.0663071	0.0474296	0.0182133	0.0507725	0.0771961	-0.0250862	0.0140583	-0.0460537	0.00219171	0.138599	-0.0426699	0.0205776	-0.00424031	-0.0641781	-0.0503315	0.0955278	0.0381154	0.0504445	-0.0143235	0.0335411	-0.0120931	-0.0165121	-0.0733015	-0.0130279	0.00172153	0.012903
V122	0.032914	0.0660528	0.0367032	-0.0124593	-0.0212088	0.0124517	0.00902257	-0.0336935	-0.00285204	-0.0589645	0.0424432	-0.0418636	0.0208856	0.00124502	0.0255983	0.0449247	0.106908	0.00808175	-0.0203973	-0.0714207	-0.0284774	0.0132957	-0.071878	0.0291561	-0.0057622	0.0256703	0.0390051	0.0760488	-0.0354673	0.0345423	-0.0500494	0.0190117	0.117668	-0.0302027	0.0541213	0.0140407	-0.0367661	-0.0768575	0.100242	0.0230138	0.0297692	-0.0177171	0.0505364	-0.00859791	-0.0272126	-0.0808174	0.0102657	0.0309106	0.00945648
V123	0.0285072	0.0695931	0.0433796	-0.00822974	-0.0163515	-0.00417214	0.0125156	-0.0278552	-0.0218326	-0.044808	0.0629933	-0.0712568	0.0807733	0.0143857	0.0571357	0.0716272	0.0908693	0.00234486	-0.0174083	-0.0634944	0.00276979	0.0138616	-0.0486688	-0.013019	-0.00419515	0.0414634	0.0587762	0.0482816	-0.0517037	0.0320508	-0.045004	0.0247672	0.104523	-0.0337741	0.048445	0.030056	-0.00576434	-0.0899448	0.0873266	0.0450801	0.0227357	-0.00789932	0.0589077	0.0165388	0.00327627	-0.0842593	0.0158658	-0.00418508	0.0227546
V124	0.0241856	0.0723857	0.0436192	0.00210334	-0.00794506	-0.0130092	-0.000946414	-0.0283379	-0.0359513	0.00772897	0.0689503	-0.0680253	0.117185	0.0173922	0.104001	0.0816888	0.0451522	-0.0110681	-0.0223139	-0.0320726	0.0301265	0.031356	-0.0461258	-0.0486683	0.00499488	0.0365057	0.102312	0.0248009	-0.02056	0.0331937	-0.0681876	0.0319806	0.0453887	-0.0569549	0.0300952	0.0297911	0.0583304	-0.0928623	0.0560699	0.0257958	0.0128445	0.00175711	0.0336654	0.00306135	0.0107311	-0.0732101	0.0238962	-0.0692583	0.0592346
V125	0.0213105	0.0699913	0.0425723	0.0110628	0.00328604	-0.0124143	-0.0169577	-0.048275	-0.0375748	0.0325525	0.0479928	-0.0495715	0.132479	0.0448163	0.127492	0.0673734	-0.00346372	-0.0438696	-0.0346305	-0.00288148	0.0690047	0.0275731	-0.0493807	-0.0748841	-0.0146787	0.0690857	0.124188	0.0299528	0.00280298	0.0189609	-0.0699448	0.00880542	-0.00715922	-0.0782594	0.0266156	0.0343816	0.0531223	-0.108478	0.0427452	0.00481486	0.0271965	0.0534551	0.0342001	0.0101591	0.00527405	-0.0512751	0.0317166	-0.0647644	0.0722007
V126	0.0211928	0.0682419	0.0414101	0.019725	-0.00191157	-0.00849178	-0.0275408	-0.0764602	-0.0377895	0.0510537	-0.00604876	-0.00333545	0.123768	0.0646346	0.130591	0.0236407	-0.053244	-0.0624197	-0.0182335	0.0261734	0.0314866	0.0221691	-0.0784262	-0.082026	-0.0245954	0.0607422	0.141144	0.0288135	0.0384208	0.0151385	-0.0583166	-0.02643	-0.0429244	-0.0860394	-0.0168214	0.0203213	0.0585354	-0.0895941	0.0393506	0.0174364	0.0269461	0.0444695	0.0249982	-0.00122352	0.0125434	-0.020787	0.0307228	-0.0438684	0.0717622
V127	0.0202366	0.0655842	0.0400422	0.0204781	-0.0106025	0.014362	-0.0434254	-0.0841491	-0.0222963	0.0614083	-0.0535581	0.0226113	0.0936348	0.0679694	0.119141	-0.0168192	-0.0946526	-0.0997227	-0.00591928	0.0404092	-0.0245006	0.0112252	-0.0648535	-0.0978389	-0.0474191	0.025047	0.132207	0.0421167	0.0303592	-0.0013283	-0.0130447	-0.00784189	-0.075965	-0.111545	-0.0585082	0.0174813	0.0664354	-0.0463486	0.0327547	0.0137257	0.00403441	0.0348456	0.0173352	0.0126653	-0.00698173	0.0201949	0.0158698	-0.0207514	0.00712334
V128	0.0230036	0.062838	0.0308162	0.0117692	-0.0294656	0.0485763	-0.0368022	-0.100787	-0.00739656	0.0644962	-0.0972685	0.0496518	0.0502455	0.0305518	0.079263	-0.0161201	-0.0843704	-0.103362	0.024591	0.0594638	-0.043266	0.00312218	-0.0761722	-0.102664	-0.0348048	-0.0272282	0.105783	0.0643639	0.00238846	0.0515728	0.00412115	0.00612509	-0.0598703	-0.0988418	-0.0933221	0.0164015	0.0415844	-0.0146426	-0.00524513	-0.000958196	0.00141515	0.0246492	0.0180469	0.0228091	-0.0280539	0.0411204	0.0441418	-0.00358385	-0.022352
V129	0.0274724	0.0632535	0.0229123	0.00357874	-0.0419326	0.0539364	-0.0144052	-0.0999459	0.00260765	0.0372255	-0.0934432	0.0433473	0.0136613	0.0223002	0.0364669	-0.0453815	-0.0800482	-0.0609441	0.0441006	0.0733605	-0.0572483	-0.00243769	-0.0527865	-0.0781142	-0.0414631	-0.072504	0.0816101	0.0501474	-0.0482327	0.0662728	0.0463625	0.0243807	-0.0280973	-0.0506657	-0.054905	0.0666718	0.0305273	-0.0114828	-0.0187455	-0.013426	0.0210766	0.0579928	0.00838389	0.0128683	-0.0791553	0.0487464	0.0443796	-0.00480656	-0.0597968
V130	0.0320222	0.0664485	0.0137724	0.0124373	-0.0371408	0.062364	0.00168384	-0.0808589	0.0066723	0.0337444	-0.0709076	0.032312	-0.00254678	0.00897002	0.0263266	-0.0649649	-0.0400763	-0.0171854	0.0571084	0.0680993	-0.0480096	0.0111319	-0.0332625	-0.0307823	-0.0469881	-0.0464395	0.0262698	0.0144743	-0.0717117	0.0731735	0.0989564	0.0116621	0.00489454	-0.00234348	-0.0343851	0.0517288	0.0334925	-0.038462	-0.0336173	0.0161855	-0.0120832	0.0345562	0.00735634	0.0270355	-0.117626	0.0528416	0.0392656	0.00441333	-0.0354506
V131	0.0335306	0.0668423	0.0124207	0.0271309	-0.0307881	0.0621183	0.0238893	-0.0713286	0.00673858	0.0242294	-0.038613	-0.00146215	-0.00804247	-0.00845476	0.0405676	-0.0729151	-0.0219601	0.00757791	0.060804	0.0376191	-0.0253652	-0.00693327	-0.0139664	-0.0124684	-0.0325645	-0.00883447	-0.0148013	-0.0337196	-0.0723148	0.0606705	0.0941293	-0.0144613	0.0209605	0.00631655	0.0111708	0.0239939	0.0321921	-0.0425324	-0.0364448	0.0373108	0.00999108	-0.0162147	-0.0403797	0.0540399	-0.151818	0.0510129	0.0443099	0.0245184	-0.0389446
V132	0.0340809	0.0660196	0.018356	0.0329826	-0.0214663	0.0646749	0.0340975	-0.0481973	0.00422127	0.0289157	-0.00683986	-0.0169455	-0.0235744	-0.0178226	0.0268328	-0.0407803	-0.0114989	0.014404	0.0470539	0.0160201	-0.00898393	-0.0540696	0.00171774	-0.00674686	-0.024309	0.0578947	-0.0580891	-0.0616047	-0.052322	0.0544134	0.0978145	-0.00848145	-0.000246655	-0.00384936	0.0552417	0.00575093	0.0670687	-0.0492362	-0.00843218	0.0372634	0.0448984	-0.0405424	-0.0500596	0.0787922	-0.149631	0.0665094	0.0236737	0.0173364	-0.00846672
V133	0.0339897	0.063856	0.0287202	0.0331008	-0.00808164	0.0622117	0.0262235	-0.022862	0.00379667	0.0309714	0.0247194	-0.00600261	-0.00932277	-0.0450325	0.0427682	0.0116571	-0.0114987	0.0228891	0.0505575	0.0207775	0.00415073	-0.0871557	-0.0139736	-0.00943542	-0.0238156	0.094502	-0.103346	-0.0434061	-0.0448298	0.0356096	0.0820374	-0.0516917	0.00104638	0.0141862	0.0454237	-0.0155693	0.054959	-0.018002	-0.000682405	0.0409131	0.0759735	-0.0525074	-0.0134413	0.0963206	-0.0982368	0.076436	0.0240175	0.0125023	-0.00139518
V134	0.0335323	0.0611326	0.0324418	0.0391099	0.0105424	0.0704192	0.0158828	0.00180379	0.00510316	0.0366826	0.0247606	0.0270036	-0.012795	-0.0688355	0.0538564	0.0446601	-0.0227806	-0.00767094	0.0560821	0.0264489	0.0135091	-0.0831823	-0.0157412	0.0128822	0.00115221	0.0847931	-0.121849	-0.00137958	0.00508794	0.0225561	0.0695295	-0.0612489	-0.0261618	0.00627851	0.0268186	-0.00936568	0.02137	-0.0269703	0.0199145	0.0810586	0.0754601	-0.083651	0.0388472	0.09387	-0.0403968	0.0578304	0.0186013	-0.0106343	0.00131418
V135	0.0325251	0.0608393	0.0340169	0.0377396	0.0156554	0.06312	0.0183546	0.01488	-0.00112563	0.0353404	0.0137971	0.0601177	-0.0204482	-0.0735788	0.0594738	0.0867009	-0.0215745	-0.0424973	0.0562088	0.0237201	0.0439353	-0.0550833	-0.024766	-0.00208513	0.00271261	0.0589186	-0.0961809	0.035073	0.0142101	-0.00337395	0.04631	-0.052603	-0.0761452	0.00609645	0.00892142	-0.056091	-0.00961375	-0.00521165	0.00956776	0.0765295	0.050167	-0.091562	0.107137	0.0391038	0.0206471	0.0307713	0.00762366	-0.0112233	-0.00373968
V136	0.0304647	0.0633933	0.0310195	0.042075	0.0113067	0.0714345	0.0284669	0.0218815	-0.0128567	0.0231925	0.00275809	0.0746291	-0.0310723	-0.0701205	0.0453336	0.107538	-0.0160476	-0.0680691	0.0427935	0.0316972	0.0160021	-0.0150559	-0.0211251	0.0226134	-0.00240785	0.0284831	-0.0465948	0.0667812	0.00976681	-0.00671217	0.0637388	-0.0479866	-0.09794	0.0108058	-0.01128	-0.0618528	-0.0133164	-0.00057695	0.00856288	0.0622552	0.000982594	-0.0468307	0.163721	0.00423166	0.019792	0.00285141	-0.0554294	-0.0159995	0.00436795
V137	0.0297267	0.0658037	0.0263301	0.0442012	-0.0018084	0.071146	0.0279847	0.00525455	-0.0104496	0.021626	-0.00153046	0.0868911	-0.0357132	-0.059888	0.017462	0.0911346	-0.0150165	-0.0668565	0.0346329	0.0167839	-0.0235367	0.0192097	-0.0267221	0.0374334	0.00352843	0.0181591	0.00316167	0.0724841	0.0315086	0.0131022	0.0611775	-0.0463763	-0.102396	0.0426014	-0.0333862	-0.0629161	-0.0184973	0.0383347	0.0294202	0.0494191	-0.0588094	0.0134464	0.158034	-0.000422325	0.0154871	-0.0288616	-0.0755799	-0.0201448	-0.00439946
V138	0.0305363	0.0654771	0.0206918	0.0352987	-0.0160863	0.0777859	0.0358919	0.00558414	1.43363e-05	-0.00984717	-0.0233077	0.082143	-0.056655	-0.0575073	-0.0116374	0.0697758	-0.00117072	-0.03525	0.0303376	-0.000195356	-0.0218914	0.0450055	-0.039045	0.0431431	0.0183268	-0.0195858	-0.00176641	0.0795167	0.0244685	0.034693	0.0514759	-0.0232131	-0.118756	0.0709786	-0.0633239	-0.0431665	-0.0188472	-0.0275783	0.0311453	0.0318217	-0.125264	0.0485248	0.101498	0.0031647	0.00536465	-0.0408197	-0.0788143	-0.0292894	-0.0293851
V139	0.0317071	0.0671239	0.00856244	0.0267482	-0.033012	0.0845286	0.0334732	-0.000916261	0.00713695	-0.0361991	-0.0274666	0.049711	-0.070882	-0.0441499	-0.0513678	0.0386636	0.00295918	0.0212718	0.0293361	0.00972904	0.00525886	0.0449699	-0.0437847	0.0414443	0.0258203	-0.0241509	-0.00550443	0.0696995	-0.0290662	0.0507777	0.0187658	-0.0114814	-0.115557	0.0787739	-0.0250407	-0.0155071	-0.01747	-0.0603091	0.0411706	0.00361032	-0.130458	0.0753171	0.0482356	0.0151583	-0.00210724	-0.0262684	-0.0604759	-0.0143789	-0.0354131
V140	0.0331589	0.0680948	-0.0003687	0.0175614	-0.0276994	0.0765816	0.0172425	-0.00733135	0.00223423	-0.0369292	-0.0217883	0.0235642	-0.0642329	-0.0324177	-0.0795903	0.0117748	0.0114055	0.0721098	0.0339706	0.00296169	0.036275	0.043647	-0.0475162	0.0245607	0.0143688	-0.000365882	-0.0116245	0.0381824	-0.0758019	0.0402341	-0.00432722	-0.0355334	-0.0928128	0.0762328	0.0132617	0.011242	0.0036699	-0.0746747	0.0532605	-0.0362284	-0.103214	0.0941477	-0.0225809	0.0132547	-0.00826098	0.031241	-0.0619483	0.0146602	-0.0254562
V141	0.0324783	0.0680051	-0.00747569	0.0135645	-0.0190536	0.0721071	-0.000856984	-0.016562	-0.00138946	-0.0382723	-0.0266358	0.000242807	-0.0720826	-0.0269245	-0.100977	-0.00444026	0.0188614	0.0967003	0.0535651	0.00916459	0.0373993	0.0342058	-0.0469458	0.0207941	0.0454703	0.0383854	-0.0233255	0.0114726	-0.113299	0.0138916	-0.0086237	-0.050514	-0.0577059	0.0332871	0.0457578	0.0330279	0.0251379	-0.084323	0.0367678	-0.0751145	-0.0580615	0.0778493	-0.0417676	-0.0109477	-0.002454	0.0359317	-0.0183214	0.00102054	-0.00244673
V142	0.0320449	0.0659179	-0.00590851	0.0062539	-0.0221615	0.0603855	-0.0331326	-0.0194403	-0.00863167	-0.0159919	-0.00126629	-0.00812829	-0.0559734	-0.0198697	-0.104893	-0.013257	0.0052253	0.101487	0.0507638	-0.0072374	0.084994	0.0296064	-0.0690999	0.0225494	0.0328218	0.0640106	-0.0221642	-0.0214976	-0.111779	0.00854415	-0.0408636	-0.0601339	-0.0835525	-0.00834277	0.0798383	0.0149948	0.0213022	-0.092167	0.036627	-0.115115	-0.0291871	0.0320131	-0.0603911	-0.0274544	0.0019896	0.0336837	0.0322582	0.000909157	-0.00739367
V143	0.0331528	0.0619872	0.0026785	-0.00296148	-0.0235359	0.0496363	-0.0457345	-0.0211938	-0.0239779	-0.00585998	0.0105564	-0.0180581	-0.0416009	-0.00765265	-0.115202	-0.00726626	-0.00517032	0.106393	0.0429747	-0.0540802	0.0960615	-0.0032856	-0.0832689	0.0264342	0.0174561	0.080805	-0.0281459	-0.036483	-0.104368	-0.00231038	-0.040286	-0.0655436	-0.0673847	-0.0424792	0.0990098	0.0103191	-0.0270148	-0.0807689	0.0236142	-0.108131	0.00619656	-0.0229772	-0.0390841	-0.023874	0.0418083	0.0110411	0.0619352	-0.0198925	-0.0323631
V144	0.0334763	0.0598731	0.0172334	-0.0189258	-0.0374324	0.0501023	-0.0605206	-0.00270693	-0.0311931	0.0169526	0.0265647	-0.0202702	-0.0220619	-0.00469285	-0.122696	0.0242431	-0.0426646	0.0695066	0.0447076	-0.0619265	0.0725374	-0.0248491	-0.0847415	0.0359215	0.0158492	0.0608336	-0.0217676	-0.0554071	-0.0774925	0.0121875	-0.0284328	-0.0351061	-0.0445101	-0.0641583	0.0642951	-0.00940051	-0.0537215	-0.0470247	-0.00425737	-0.10152	0.00488441	-0.0702005	-0.0280849	-0.0291284	0.055565	0.000956109	0.0369859	-0.0134552	-0.0672718
V145	0.0331939	0.0572117	0.0348172	-0.0385752	-0.0369092	0.0565174	-0.0489475	-0.000593094	-0.0273354	0.0299673	0.0421278	-0.0384204	-0.0113836	-0.0045234	-0.0955017	0.0513661	-0.0704058	0.0064155	0.0243491	-0.0823657	0.0560016	-0.0598625	-0.0660004	0.0353666	0.0147329	0.0365353	-0.0143399	-0.0685842	-0.0520643	-0.00131947	0.0108003	0.018342	-0.0336612	-0.0877142	0.0107133	-0.00199827	-0.102022	-0.04669	-0.033072	-0.0775288	0.0167014	-0.0502763	3.96122e-05	-0.0198444	0.0211047	-0.024344	-0.0287797	-0.0111239	-0.0698996
V146	0.0330044	0.0565078	0.0388411	-0.0478626	-0.0474055	0.0550955	-0.0309837	-0.0110724	-0.0029663	0.0449993	0.0298029	-0.0334406	-0.0374359	-8.39616e-05	-0.0677347	0.0539061	-0.0891827	-0.0296866	-0.0167139	-0.0810254	0.0584824	-0.0700712	-0.0400325	0.0581665	0.0298088	-0.0110465	0.0071537	-0.0662611	-0.0292656	0.0275752	0.0116668	0.0523467	-0.0125628	-0.0409899	-0.0271299	-0.0101909	-0.110453	-0.020582	-0.0435831	-0.0343841	0.00992547	-0.0624831	0.027829	-0.0282118	0.00102385	-0.0211254	-0.0565234	-0.0052696	-0.0351748
V147	0.0306499	0.0573869	0.0368627	-0.055007	-0.0516508	0.0668095	-0.0116628	-0.0176177	0.00634796	0.0255017	0.0203418	-0.0482861	-0.0531916	0.0149911	-0.0289763	0.014579	-0.119279	-0.0401529	-0.0593371	-0.0565467	0.0358775	-0.0654521	0.00546134	0.063318	0.0275335	-0.0300737	-0.00142408	-0.00828371	-0.0256835	0.014754	0.0566856	0.0861367	-0.00971579	-0.0246197	-0.0738666	-0.002954	-0.101651	-0.00845065	-0.0579649	0.00931107	-0.0367551	-0.034093	0.0517431	-0.0173706	-0.0370509	-0.0298314	-0.0723992	0.0181743	-0.0230321
V148	0.0282885	0.0566646	0.0296461	-0.0520173	-0.055521	0.0901253	0.00564963	-0.0186026	0.0232439	0.00200058	-0.00115785	-0.0541311	-0.0853167	0.00705996	0.0310281	0.000608885	-0.108697	-0.0124185	-0.109381	-0.0551053	0.0367895	-0.0552662	0.0530249	0.0486399	0.0255883	-0.024313	-0.0106372	0.0209199	-0.00108786	0.0157257	0.0363952	0.08892	0.00138606	-0.00687212	-0.0867032	-0.0181591	-0.0942183	-0.00545053	-0.0438429	0.0404775	-0.0405998	-0.0455085	0.0144007	0.0320468	-0.074198	-0.00851361	-0.0307157	0.0238606	0.0193195
V149	0.0292243	0.0542541	0.0273777	-0.0536348	-0.0542508	0.0871239	0.0197239	-0.0346881	0.0281115	-0.022721	-0.0109991	-0.0458829	-0.0995884	-0.0132791	0.061811	-0.00767127	-0.0662666	0.0174323	-0.118606	-0.0450317	0.0435619	-0.084156	0.0776712	0.0251659	0.0173947	-0.00960444	-0.00414356	0.05334	0.000514294	0.0109594	0.0219644	0.0898599	-0.000376993	0.0195325	-0.0723982	0.00155435	-0.0523266	0.0215544	-0.0151709	0.00396653	-0.0402751	-0.0247434	-0.0382233	0.0943529	-0.111022	0.0196607	-0.021648	0.0575336	0.0123269
V150	0.0317263	0.052757	0.0244238	-0.0511822	-0.0522944	0.0804093	0.00225539	-0.0578369	0.0327463	-0.0240441	-0.0154334	-0.0188966	-0.0683497	-0.0185895	0.0962315	0.00262901	-0.0178954	0.0252538	-0.104441	-0.0433944	0.0541847	-0.0604121	0.0923669	0.0141444	0.0375919	0.0181071	-0.00796227	0.0899552	0.0129244	0.00979395	-0.00126278	0.0865096	0.0135477	0.0388935	-0.0362428	0.0117596	-0.011324	-0.000608207	-0.0109604	-0.0246828	-0.0277643	0.0134801	-0.0565805	0.104724	-0.0686227	0.0725869	-0.0254448	0.0918174	0.0246513
V151	0.0330143	0.0528597	0.0254347	-0.0485535	-0.0441828	0.071028	-0.00933823	-0.0722176	0.0301357	-0.0164653	-0.0130451	-0.00575028	-0.0235749	-0.0523965	0.110145	-0.000323761	0.0269052	0.0353265	-0.0663952	-0.00492104	0.0584127	-0.0421995	0.0896188	-0.00843185	0.0629816	0.0253915	-0.0180646	0.128104	0.00795832	-0.0189197	-0.031487	0.0708161	-0.0112873	0.0572449	3.81284e-05	0.0224696	-0.0150002	0.0189695	-0.0497646	-0.0594803	0.00460684	0.0161704	-0.0517038	0.057603	0.00463309	0.0745977	0.0126578	0.115624	-0.0102401
V152	0.0339278	0.0530385	0.0204627	-0.0425437	-0.0403477	0.0624434	-0.0138685	-0.08504	0.0314625	0.0309991	-0.00546239	-0.0155217	-0.0037667	-0.062	0.0763084	-0.000825524	0.0573797	0.0151959	-0.0540052	0.0178804	0.0590069	-0.0158483	0.0587041	-0.0316295	0.0729383	0.0211573	-0.018508	0.136035	-0.00822688	-0.035742	-0.0530097	0.0522673	-0.0404751	0.0564844	0.0732693	0.0351824	0.00726925	-0.000444152	-0.0714563	-0.0922253	0.019906	0.0123541	-0.058473	-0.0116356	0.0875967	0.0697309	0.013458	0.0870668	-0.0322778
V153	0.0356439	0.0532273	0.0227728	-0.0393555	-0.0330872	0.0538833	-0.00935038	-0.0726947	0.0257143	0.0431172	0.0248897	-0.0354569	0.0374448	-0.0694112	0.0414753	0.00616305	0.0647468	0.00903699	-0.0355167	0.0263678	0.0491694	-0.00597167	0.0160884	-0.0537318	0.0415246	0.0384398	-0.0341514	0.12641	-0.0177431	-0.00136918	-0.0548377	0.0140568	-0.0168676	0.0450595	0.0985497	0.00656646	0.0157787	0.026831	-0.0945504	-0.0918681	0.0570162	0.0351882	-0.0329688	-0.0691543	0.126107	0.0486511	-0.0267686	0.0547802	-0.0385316
V154	0.0363456	0.0550763	0.0249816	-0.029782	-0.0271118	0.0557685	-0.00778957	-0.0582995	0.0468239	0.0441054	0.04238	-0.0624287	0.0476639	-0.0585359	0.00552654	-0.0130415	0.0538287	-0.0160623	-0.018503	0.0332501	0.0111989	0.0197485	-0.0156885	-0.0303431	0.0541805	0.0177608	-0.0543565	0.10827	0.0103333	0.0175986	-0.0221903	0.00740739	-0.013856	0.0580634	0.103404	0.0337665	0.00887738	0.0262947	-0.0821708	-0.0469718	0.0433394	0.0530043	-0.0380598	-0.0917836	0.109607	0.0323955	-0.047316	0.0195506	-0.0195216
V155	0.0376956	0.0517585	0.02581	-0.0249436	-0.0270625	0.0583163	-0.00616879	-0.0367283	0.0640174	0.0276516	0.0311381	-0.0866451	0.0282948	-0.052206	-0.0252401	-0.0303558	0.0459037	-0.0360086	-0.0361462	0.037171	-0.0101093	0.00646509	-0.0478539	-0.0206649	0.0507489	-0.00665864	-0.0658668	0.0920376	0.0249669	0.0401114	0.0102199	0.0320637	-0.0305545	0.0597319	0.0664718	0.0416782	-0.00916851	0.0232929	-0.0562133	0.00343483	0.0334013	0.0302506	-0.0673625	-0.0860491	0.128198	-0.00123999	-0.0556245	-0.0246066	-0.0381481
V156	0.0384476	0.0541484	0.0194915	-0.016083	-0.0266202	0.063954	-0.000465402	-0.0122393	0.0674551	-0.00373242	0.0160124	-0.104768	-0.0137113	-0.0269148	-0.0301524	-0.0488182	0.0289733	-0.0506481	-0.0569445	0.0434287	-0.0159545	0.00671748	-0.0437125	-0.013968	0.0336767	-0.0485907	-0.0500676	0.0812363	0.0161232	0.0132331	0.0360725	0.0320221	-0.0441764	0.0449947	0.0132306	0.0559457	-0.00648119	-0.0107349	-0.0324379	0.00965705	0.0161882	0.01441	-0.0853189	-0.0503442	0.0799803	-0.0519335	-0.0560526	-0.0325195	-0.0102479
V157	0.0385504	0.055168	0.0138419	-0.0150044	-0.0352904	0.0662856	-0.0074366	-0.0079288	0.0689593	-0.0388474	0.0125769	-0.106928	-0.022209	0.0051891	-0.0402026	-0.0523684	0.00677156	-0.0433448	-0.0738446	0.0350714	-0.0335712	0.00640358	-0.0336412	0.00254786	-0.0122513	-0.0449306	-0.0174766	0.0353704	-0.00347629	0.00232448	0.0521743	0.0532779	-0.0266022	0.0179132	-0.00960211	0.0540801	0.00766641	-0.00580227	0.0110543	-0.0147376	0.0239095	0.0135054	-0.0561083	-0.0341706	0.0303903	-0.0747175	-0.0303024	0.00744033	0.0598471
V158	0.0376264	0.0572656	0.0120421	-0.0114031	-0.042988	0.0700706	-0.00903538	-0.00768131	0.0527225	-0.0481722	-0.00598092	-0.0842424	-0.0411056	0.0216618	-0.0590222	-0.0513447	-0.00944236	-0.0392761	-0.080352	0.0220192	-0.0274923	0.014992	0.00115232	0.0228628	-0.0450767	-0.032466	0.00927848	0.00188175	-0.00988114	-0.000860349	0.0400775	0.0636187	-0.0176453	-0.0141686	-0.0468141	0.0540444	0.0144019	-0.0237298	0.0585463	-0.0196107	-0.0149344	0.00728784	-0.0478675	-0.0189612	-0.0146829	-0.0910391	-0.00795816	0.0266764	0.094362
V159	0.0372105	0.0568193	0.00782707	0.00122172	-0.0533681	0.0794335	-0.00975323	-0.0121231	0.0254137	-0.0555806	-0.0174552	-0.0688839	-0.0430876	0.0372973	-0.0572657	-0.0514888	-0.0198454	-0.0133656	-0.0682399	0.0039023	-0.00997403	0.0140009	0.0322054	0.0255125	-0.0781599	-0.0391856	0.0311453	-0.0136767	-0.0268202	0.0229046	0.0155007	0.0720675	-0.0298164	-0.0294901	-0.0401733	0.0223012	0.00478506	-0.0284808	0.0952027	-0.0277768	-0.0225623	-0.0120797	-0.0137571	0.0122907	-0.0577055	-0.100869	0.0294518	0.0155354	0.101969
V160	0.038421	0.0522279	0.0110227	0.00708974	-0.0613327	0.0876042	-0.0132274	-0.0190788	0.00278514	-0.0366429	-0.0355653	-0.0312041	-0.019616	0.0337494	-0.0478751	-0.0640114	-0.0216347	0.0049098	-0.0461252	-0.0193999	0.00482422	0.0359862	0.0642648	0.0467376	-0.0829697	-0.0138212	0.0637382	-0.00278002	-0.0160212	0.0386481	-0.00382729	0.0721574	-0.0289319	-0.0291452	-0.014153	-0.0195274	0.010229	-0.0154248	0.099616	-0.0328521	-0.0358773	-0.0177025	-0.01884	0.0320436	-0.0506244	-0.0896252	0.0270341	0.0335648	0.0821776
V161	0.0387107	0.0507541	0.0184429	0.00515583	-0.069706	0.0834754	-0.00688637	-0.0315192	-0.0161507	-0.0194789	-0.0417316	-0.00532508	0.00137964	-0.00453377	-0.0340094	-0.0687353	-0.0116121	0.0153204	0.0111389	0.00402995	-0.00428122	0.0285889	0.0822622	0.0415889	-0.0636153	0.00964284	0.0778171	0.0203215	-0.0149051	0.0648719	-0.0040716	0.069823	-0.00326452	-0.0425807	0.0207899	-0.0328343	-0.0017657	-0.00394398	0.0719183	-0.0224895	-0.0391812	-0.0164044	0.0107532	0.0463315	-0.0441755	-0.0663975	0.00103721	0.0595659	0.0607665
V162	0.037107	0.0523065	0.0206154	-0.000788135	-0.0743701	0.0809066	-0.011122	-0.037816	-0.0192712	-0.00019808	-0.039685	0.020974	0.0415568	-0.0166173	-0.0193463	-0.0648339	-0.00954737	0.0021844	0.0543338	0.0336514	-0.010856	0.0231783	0.0932914	0.0507218	-0.0141784	0.0399587	0.0663717	0.0229892	-0.0055899	0.0742291	-0.00980364	0.0533087	0.00709277	-0.0220523	0.0380895	-0.0433675	-0.0191451	-0.00441401	0.0469511	-0.0397156	-0.0388464	0.0048986	0.03135	0.0583089	-0.0663952	-0.0146888	-0.0310368	0.0855386	0.0288352
V163	0.0380528	0.054331	0.020602	-0.00286338	-0.0680404	0.058975	-0.0161477	-0.0453953	-0.0207835	0.00872924	-0.0330607	0.0406627	0.0573017	-0.0330341	-0.00608619	-0.0736062	-0.0133495	0.022106	0.0698267	0.0351018	0.00767771	0.0022817	0.0740599	0.0356593	0.0264333	0.0501306	0.047913	0.0406173	4.14954e-05	0.0734859	-0.0288856	0.0264261	0.000824756	0.00831805	0.0516682	-0.0508912	-0.0331382	0.0130208	-0.012399	-0.0392259	-0.00682223	0.0198565	0.0486135	0.0591239	-0.0309838	0.0117963	-0.030959	0.0392052	0.0144827
V164	0.0375885	0.0592972	0.0128615	0.000461374	-0.068976	0.0491763	-0.0256755	-0.0234546	-0.0235338	0.0186281	-0.0431645	0.0546842	0.0455692	-0.015603	-0.00605226	-0.0698749	-0.0379031	0.0270612	0.0681205	0.0584889	-0.00936922	-0.0130263	0.0399491	0.0370928	0.0496418	0.0627367	0.0188347	0.0381011	-0.0157507	0.0447673	-0.00878922	-0.0271519	0.000315205	0.0327729	0.0405414	-0.039549	-0.0130986	0.0364471	-0.0684123	-0.0563903	-0.000153378	0.0360481	0.0454077	0.0374673	-0.0237661	0.0343015	-0.0323423	0.0163052	-0.00631068
V165	0.0373047	0.0625703	0.00873598	0.00185679	-0.0537929	0.0466305	-0.0232925	0.00333412	-0.0270633	0.00390013	-0.0584021	0.046915	0.033508	-0.00979595	0.0126983	-0.0695041	-0.0492563	0.038214	0.0554469	0.0452643	-0.0154466	-0.0322964	-0.00180906	0.00104429	0.049845	0.0630503	0.0203157	0.0078429	-0.0283281	-0.020847	0.0163817	-0.0928823	-0.000596521	0.0219797	-0.00574211	-0.0348882	-0.0213794	0.0075416	-0.105104	-0.0842261	0.021542	0.0668552	0.0379561	0.0290111	-0.0413834	-0.00775786	-0.00290205	0.0055444	-0.00586709
V166	0.0374113	0.0626464	0.00685142	0.00248455	-0.0456974	0.0356744	-0.0212693	0.0182283	-0.0242149	0.00578337	-0.0769975	0.0542841	0.00787514	-0.0121824	0.0317287	-0.0415349	-0.0477805	0.0349871	0.0225038	0.0392711	0.00668206	-0.0278309	-0.0191372	0.0017963	0.0135428	0.0606778	0.0234158	-0.0636797	-0.0137931	-0.0506563	0.0143805	-0.116144	0.0105296	0.0262784	-0.0559081	-0.0392065	0.00230219	0.00859681	-0.098516	-0.115815	0.0137023	0.048689	0.011676	0.0323332	-0.00406268	-0.0242535	0.0172933	0.0186742	-0.00449125
V167	0.03905	0.0596637	0.00945334	0.00144894	-0.0473166	0.024983	-0.017105	0.0126639	-0.0174302	0.015654	-0.0593231	0.0504641	-0.00852848	-4.51293e-05	0.0396122	-0.0166387	-0.0505261	0.0139875	0.00298191	0.0158977	0.0385365	-0.00536917	-0.0437286	0.00175051	-0.0176263	0.030661	0.00721177	-0.0981935	-0.0333701	-0.0613816	0.0322208	-0.09008	0.0108324	0.0168971	-0.0876569	-0.0240578	0.0267027	-0.0154553	-0.0855481	-0.125363	0.000570616	0.0388416	-0.00463936	-0.0117757	0.0277925	-0.0761699	-0.00223527	0.034145	-0.0130645
V168	0.0389851	0.0583364	0.0125929	0.00337838	-0.0487889	0.0234669	-0.0191418	0.0223209	-0.0151464	0.0369146	-0.0309889	0.0430304	-0.00850049	0.0180547	0.0310433	-0.000669148	-0.046111	-0.000709293	0.00165967	-0.0140368	0.0542605	0.020808	-0.0331727	0.00368836	-0.0633526	0.0221266	-0.0218828	-0.114389	-0.0281341	-0.0592789	0.0452198	-0.0669067	0.0240169	0.00358494	-0.086057	0.00583695	0.0280842	-0.0163273	-0.0620549	-0.103964	0.00816537	0.0322646	-0.0146865	-0.0590178	0.0596915	-0.081853	-0.0194917	0.0148703	-0.0284142
V169	0.0385397	0.0564965	0.0136004	0.00277039	-0.0426612	0.0327865	-0.0251819	0.0350841	-0.0320655	0.0382497	-0.00522187	0.0339286	-0.00668262	0.0347833	0.0188854	0.00967434	-0.0506366	0.000957966	0.00173563	-0.0346993	0.0848646	0.0509336	-0.00975593	0.0177098	-0.120103	0.00993471	-0.0323933	-0.0941204	-0.0361821	-0.0313623	0.0456961	-0.0502453	0.0305782	-0.023718	-0.0810963	0.0555701	0.021959	-0.0020085	-0.0320014	-0.0807732	0.0336338	0.0203933	-0.00639122	-0.0847666	0.055494	-0.0789233	-0.0433168	0.0108613	-0.0412201
V170	0.0387346	0.0547219	0.0124415	-0.000885616	-0.0345784	0.0413705	-0.0152645	0.0211008	-0.0379933	0.0331128	0.0320968	0.0245034	-0.00755401	0.0372407	0.0157952	0.012013	-0.0386251	-0.0196815	-0.00299619	-0.0580632	0.106852	0.0848356	0.0183991	0.0269725	-0.12473	0.00411379	-0.0423575	-0.0888372	-0.0311348	0.0110209	0.0504422	-0.0248674	0.0476571	-0.0519029	-0.0344938	0.075803	0.0289013	-0.00641512	-0.00242765	-0.0579627	0.0602505	0.0226114	0.00146359	-0.097541	0.032251	0.00584793	-0.0820735	0.00139044	-0.0466009
V171	0.039793	0.0533718	0.0106298	-0.00604651	-0.0327198	0.0509404	-0.0136331	0.0344643	-0.0458342	0.000844775	0.0735429	0.00669262	0.000452751	0.0365612	0.00375787	0.00349352	-0.0288695	-0.0276783	0.0039164	-0.042894	0.0876498	0.104299	0.0263642	0.0228681	-0.0659152	0.00471747	-0.039642	-0.077664	-0.00682464	0.0305881	0.0519312	-0.00624809	0.0186633	-0.0834543	-0.0128071	0.0836018	0.0302223	0.00496746	-0.00450551	-0.03024	0.0909374	0.0177818	0.00460448	-0.0838821	0.0088548	0.0488052	-0.0781377	-0.0102297	-0.0468617
V172	0.0425874	0.0495612	-0.000454151	-0.0115688	-0.0434018	0.0529376	-0.0124185	0.0366231	-0.0514129	-0.0158924	0.0861038	0.00817308	-0.0127764	0.00678117	-0.0162767	-0.0118853	0.00104379	-0.00847046	-0.0229494	-0.0330634	0.0592932	0.0927995	-0.0010935	0.0225283	-0.013606	-0.0109886	0.00348043	-0.0299175	0.0174299	0.0362797	0.0391413	0.00347137	-0.000556448	-0.0963937	0.0209437	0.057426	0.0309408	0.0180262	-0.00343481	-0.0109488	0.0858042	0.0203611	0.0191146	-0.0469638	0.0188202	0.0609758	-0.0528339	-0.0293253	-0.0466585
V173	0.0446844	0.043464	-0.0134138	-0.00527029	-0.0505816	0.0411591	-0.0164368	0.0342478	-0.0490006	-0.0293812	0.0871428	0.0109417	-0.0312917	-0.0180573	-0.0149149	-0.0179972	0.0055554	0.0131929	-0.0358081	0.00344612	0.0272742	0.0635543	-0.029275	0.0212188	0.0256884	-0.0333255	0.0286951	-0.0039559	0.0215917	0.0393411	0.0110885	0.0183844	0.00282607	-0.109686	-0.00807006	0.0279306	0.0244805	0.0154697	-0.0208266	-0.00787544	0.0811349	0.00492955	0.0121084	0.00296193	0.0345308	0.0237409	-0.0505229	-0.041263	-0.0490054
V174	0.0456884	0.0413113	-0.0222016	-0.00579993	-0.0586588	0.0213107	-0.017647	0.0288231	-0.0436132	-0.0381442	0.0700409	0.0188935	-0.0304894	-0.0143417	-0.0118874	-0.0103537	0.0106547	0.0202644	-0.0199892	0.0176583	-0.0100959	0.0496957	-0.0536216	0.0190853	0.0534317	-0.0399904	0.0371707	0.00152956	0.0262355	0.00812254	-0.0108496	0.00342437	0.0199761	-0.0932948	-0.0147088	-0.00141505	0.0279896	0.0150094	-0.0491323	-0.0174681	0.044972	0.0047676	0.0243638	0.0152637	0.0197869	-0.00741427	-0.0113442	-0.0339524	-0.00462694
V175	0.0467509	0.0369073	-0.0260558	-0.00245658	-0.0684069	0.0170693	-0.0130749	0.022533	-0.0300431	-0.0421885	0.0434385	0.0280603	-0.0189088	-0.0200425	-0.0124879	0.00717389	0.00986642	0.0111221	-0.0129135	0.0238982	-0.0280596	0.0140744	-0.0646902	0.00963018	0.0680753	-0.0265652	0.022661	-0.00510687	0.0299421	-0.0329541	-0.0236698	-0.000853049	0.031801	-0.065607	-0.0249829	-0.00898291	0.0198453	0.0121773	-0.066569	-0.0236847	0.0171205	0.00197436	0.0220573	0.0219216	0.00609562	-0.0612326	-0.00947451	-0.0291305	0.00298561
V176	0.0476373	0.0320916	-0.0277681	0.0102501	-0.0672729	0.0127414	-0.00586884	0.0172012	-0.019908	-0.0353121	0.0076407	0.0338351	-0.0229202	-0.00935054	-0.0105463	0.0069931	0.00327147	0.00572929	-0.011418	0.0207753	-0.0298819	-0.00117395	-0.0673594	-0.00490209	0.0634124	-0.0167972	0.00353682	0.00820685	0.0318724	-0.0663013	-0.00540445	-0.0344658	0.0250133	-0.0465004	-0.0264112	-0.0282378	-0.000966606	-0.000250586	-0.0746385	-0.0118791	-0.0209633	-0.010264	0.00767759	0.0233944	-0.0222583	-0.118782	0.0141713	-0.0386799	-0.000536125
V177	0.0480217	0.0283916	-0.0255611	0.0193839	-0.0655461	0.0193816	-0.00802946	0.0143968	-0.0106577	-0.0234858	-0.0131265	0.0347339	-0.0174893	-0.00179454	-0.000678875	0.0176005	-0.0026583	0.00765907	0.00522519	0.0157626	-0.0202872	-0.00655798	-0.0677662	-0.00840491	0.0447822	-0.0143212	0.00387263	0.0284331	0.0252266	-0.0897296	0.0290044	-0.0464973	0.0368911	-0.03188	-0.0251373	-0.0319359	-0.00891737	-0.00128473	-0.0679573	0.0192472	-0.0337208	-0.0199877	-0.00595235	0.0134995	-0.0217446	-0.131238	0.0379991	-0.023678	-0.000716759
V178	0.0482482	0.0273436	-0.0238048	0.0219794	-0.0630741	0.0334208	-0.00711975	0.00460917	-0.00799351	-0.00109437	-0.0273375	0.033643	-0.00834719	0.0139639	-0.002006	0.0298478	-0.0188734	0.00122601	0.0224415	0.0185206	-0.00737418	-0.00525211	-0.0451372	-0.00532152	0.0286727	0.013701	0.00345341	0.0288299	0.0218118	-0.0867976	0.05056	-0.0340488	0.038399	-0.0136161	-0.0180502	-0.00571126	-0.00932449	0.00895182	-0.0539112	0.0409503	-0.0388661	-0.0270075	-0.0231421	0.00461545	-0.0139077	-0.131021	0.0342959	-0.00954281	-0.00799515
V179	0.0489195	0.028706	-0.0183995	0.0189975	-0.053837	0.0423203	-0.00540535	-0.00940499	0.00021802	0.00505178	-0.0203798	0.00783265	0.00622312	0.024647	0.00478765	0.0326202	-0.0382347	-0.00821026	0.0302281	0.00896542	0.0250524	-0.0183191	-0.0121352	-0.0210842	0.000309668	0.0500069	-0.0213025	0.0553041	0.0108313	-0.0557584	0.0481785	-0.0148691	0.0398395	0.015954	-0.00152847	0.0351057	-0.0115811	0.0261709	-0.0359412	0.0595734	-0.0223658	-0.0423535	-0.0237463	-0.00988325	-0.04183	-0.112965	0.00908134	-0.010379	-0.017579
V180	0.0484275	0.031743	-0.0114411	0.0143982	-0.0344871	0.0537764	-0.00550719	-0.00562325	-0.00157049	0.00755937	-0.0160791	-0.0115532	0.0138168	0.0375848	-0.0110159	0.0301048	-0.0385091	-0.0128261	0.0200567	-0.0190015	0.0369763	-0.0293175	0.0238706	-0.0118996	-0.0067891	0.0870798	-0.0338103	0.0887769	0.00384861	-0.0417126	0.0433846	0.0158202	0.0388513	0.0280061	0.0073029	0.0616098	0.0215511	0.0434221	-0.00930834	0.0740565	-0.00109354	-0.0335704	-0.040242	-0.0357467	-0.0535527	-0.0734575	-0.0198199	-0.0170588	-0.0151182
V181	0.047844	0.0384915	-0.00467892	0.0107301	-0.0255977	0.05882	-0.000136068	-0.000364708	-0.00648967	0.014943	-0.00355637	-0.0271255	0.0193687	0.02015	-0.0101952	0.00491842	-0.0250141	0.00160346	-0.00362767	-0.0246494	0.0490873	-0.0387073	0.0373583	-0.0184875	-0.0185897	0.0955488	-0.0135888	0.0805882	-0.00635129	-0.00135289	0.018822	0.0162718	0.0246735	0.0140214	0.0209552	0.0423347	0.0358372	0.0435321	0.00807617	0.100843	0.0156095	0.00495452	-0.0395765	-0.0600237	-0.053017	-0.0306083	-0.0277998	-0.0330297	0.0218274
V182	0.0462916	0.0437582	-0.00197412	0.00520165	-0.00815239	0.0689658	0.00608177	0.0149648	-0.0161162	0.0110106	-0.0116427	-0.0352812	0.00582113	0.0114592	-0.0218086	0.00658302	-0.00445031	-0.0011159	-0.036429	-0.012942	0.0308336	-0.0409225	0.051726	-0.0392259	-0.0264286	0.0983248	0.0125278	0.0463934	-0.0315925	0.00944933	0.00370011	0.00430805	0.0110841	0.00730781	0.0382868	-0.00329397	0.0586237	0.0291538	0.0263395	0.0886559	0.0122604	0.0291012	-0.0152366	-0.0710586	-0.0525234	0.00765124	-0.0201023	-0.0132618	0.030629
V183	0.0460848	0.0451862	-0.000994258	0.0010911	-0.0108731	0.0583124	0.00518994	0.0177711	-0.0217693	-0.0159658	-0.00914476	-0.0296294	-0.0145487	-0.0231914	-0.0165288	0.00584702	0.0262223	0.0016351	-0.0645121	-0.0034797	0.0277014	-0.0290046	0.0457421	-0.058298	-0.0319001	0.0753452	0.0190929	0.0107939	-0.0273619	0.0268566	-0.0372661	0.00541017	-0.00675811	0.0221667	0.0528041	-0.0614393	0.059763	0.0222961	0.0133128	0.0772783	0.00382094	0.0263818	0.0107118	-0.0600447	-0.0291464	-0.00638303	0.0100231	-0.0376864	0.0497251
V184	0.0460104	0.0452784	-0.000768748	0.00399003	-0.0291767	0.0365934	0.000835793	0.0285894	-0.0287949	-0.0259344	-0.0178784	-0.0178831	-0.0237986	-0.0298427	0.00266821	0.0248836	0.0401586	-0.0206127	-0.0489709	0.0205076	0.000426595	-0.0161707	0.0447868	-0.0425439	-0.0372513	0.0580364	0.00610872	-0.0303148	-0.0203017	0.0362923	-0.0338471	-0.00491536	0.0283871	0.0386687	0.0619653	-0.102508	0.0704939	0.0300209	0.0039557	0.0785065	0.015439	0.0163201	0.0352841	-0.0341259	-0.0139815	-0.0221195	0.000980495	-0.0541245	0.047561
V185	0.0454364	0.0442229	-0.00202913	0.0134138	-0.0418753	0.0134065	-0.00852293	0.0440932	-0.0209748	-0.0467738	-0.0259765	0.0147243	-0.0183845	-0.0282521	0.030939	0.0237345	0.0710777	-0.0191767	-0.0361009	0.0187721	-0.0410712	-0.00810589	0.0464775	-0.0351749	-0.0311176	0.0260957	5.00589e-05	-0.0559641	-0.017045	0.0101513	-0.00420989	-0.0218026	0.0449399	0.058561	0.0645111	-0.107151	0.0599178	0.000706754	-0.00289628	0.0655612	0.0391295	0.0103519	0.0420316	-0.019491	-0.0151035	-0.0296037	0.0216492	-0.0684214	0.0379058
V186	0.0435584	0.0426459	0.000500454	0.014379	-0.0451048	-0.00325981	-0.00987978	0.0574435	-0.0290742	-0.0673304	-0.0486352	0.041401	0.00211379	-0.0319582	0.0489965	0.0384842	0.0756596	-0.0295096	-0.0321706	0.0456532	-0.074643	0.0153792	0.0646344	-0.00332229	-0.0200816	0.01316	-0.00247001	-0.0700922	0.00669675	-0.0167904	0.0209503	-0.0503184	0.0508956	0.0806282	0.0615749	-0.067276	0.0280584	0.015834	-0.0315534	0.0404743	0.044421	-0.0237331	0.0380462	0.0225258	-0.0202354	-0.024632	0.0248166	-0.0405289	0.0114398
V187	0.0430368	0.0386128	0.00365357	0.00973857	-0.0508618	-0.0143612	-0.0105133	0.0410789	-0.01435	-0.0781723	-0.0568692	0.0463003	0.00939094	-0.026239	0.0600775	0.0653939	0.0633967	-0.0444404	-0.0290002	0.0586369	-0.0877498	0.0428446	0.0655094	0.0101206	-0.0104094	-0.0131257	-0.0124764	-0.0570579	0.00972913	-0.055576	0.0450098	-0.0517595	0.0208872	0.091549	0.0631778	-0.00598316	0.0104933	0.0299802	-0.0339775	0.00745252	0.0704654	-0.0712726	0.000839118	0.0459057	-0.0499057	-0.0266871	-0.00396599	0.014534	-0.00251357
V188	0.0427861	0.0372808	0.00679321	0.00377548	-0.0629751	-0.012039	-0.000886398	0.03581	-0.00591667	-0.0577066	-0.0557226	0.0405606	0.021417	-0.0115573	0.0455429	0.0708481	0.0416375	-0.0545568	-0.00757448	0.0709424	-0.0702895	0.0672074	0.0700685	0.012385	0.0162532	0.00132879	-0.0150808	-0.0557667	0.00744465	-0.0750673	0.0800602	-0.0536911	-0.0163217	0.0686823	0.0591995	0.0298874	-0.0148666	0.0361331	-0.0143631	0.00641775	0.0896051	-0.119198	-0.0310893	0.0424278	-0.0468789	-0.0251944	-0.0196202	0.0412273	-0.0241766
V189	0.0432071	0.0339294	0.00965841	-0.000996261	-0.0759868	-0.0071491	0.000110403	0.0388159	0.0134687	-0.0251364	-0.0520122	0.0195348	0.0343612	-0.00418137	0.00468873	0.0730411	0.0100969	-0.0421559	-0.0153994	0.0768531	-0.0640522	0.053613	0.0652389	0.0124769	-0.00938399	0.00256094	-0.0163901	-0.0348007	0.0147843	-0.0865226	0.0902198	-0.0331686	-0.0253838	0.029922	0.0594738	0.0309872	-0.0133648	0.059747	0.00279362	0.0319608	0.103865	-0.144855	-0.0606004	0.0557836	0.00657577	-0.0285165	-0.0366598	0.0684448	0.00215539
V190	0.0437646	0.0333955	0.0140875	-0.0132453	-0.0843236	-0.0147431	0.0144882	0.0214103	0.0410517	0.013205	-0.0371703	0.000497522	0.038391	-0.0277635	-0.0171525	0.0534761	-0.0134206	-0.0445546	-0.0331582	0.0735324	-0.0332935	0.0143309	0.060523	0.0315664	-0.0269781	0.0024842	-0.0191544	-0.0255959	-0.00263041	-0.0667701	0.0651319	0.00558736	0.0222444	0.0216839	0.0473934	0.0165077	0.00366202	0.069781	0.00897604	0.0254648	0.0817194	-0.144207	-0.0884174	0.0249951	0.0690066	-0.0226594	-0.0541936	0.0772479	0.0325831
V191	0.0425276	0.0350051	0.0173488	-0.0295543	-0.0834655	-0.0302092	0.0266875	0.0263886	0.0555314	0.0364094	-0.036926	-0.0148633	0.0496787	-0.0148132	-0.0360107	0.00327769	-0.0365293	-0.0533547	-0.0203805	0.0817927	-0.019023	0.00242914	0.0528742	0.0224166	-0.00579195	-0.0218885	-0.0340738	0.000486487	-0.00653582	-0.0384264	0.0272528	0.0311901	0.0582276	0.00893845	-0.0119825	0.0338463	0.0515583	0.0233477	-0.0253349	0.00113875	0.0203263	-0.121956	-0.0690129	-0.0257126	0.116204	-0.0151246	-0.0828019	0.0776126	0.0831089
V192	0.0397569	0.0350594	0.0176746	-0.0501982	-0.0861652	-0.0388291	0.0382885	0.0346736	0.0772769	0.0398311	-0.0390256	-0.00678543	0.0598298	-0.00618681	-0.059915	-0.0487516	-0.0441872	-0.0488964	-0.0195991	0.0678479	-0.0112698	-0.00187038	0.0396131	0.0104713	0.0170679	-0.0251179	-0.0403171	0.00830203	0.00472178	-0.0228924	-0.00274109	0.0112082	0.0750159	0.00704445	-0.00105083	0.00875986	0.0504988	-0.0264488	-0.029658	-0.0239019	-0.0276173	-0.0522141	-0.0187012	-0.0455579	0.137618	-0.0326912	-0.055419	0.0421962	0.0950406
V193	0.0373192	0.0300175	0.0153141	-0.0584234	-0.0787381	-0.0494373	0.0399855	0.0347758	0.115883	0.0318359	-0.0483755	0.0123234	0.0656582	0.000755765	-0.0592285	-0.0962361	-0.0380751	-0.0409275	-0.0270817	0.0677577	-0.0136991	-0.0123287	-0.00351434	-0.00586521	0.0127382	-0.0361883	-0.0465774	0.0128188	-0.00883167	-0.015955	-0.0185198	-0.0129561	0.0867039	0.021145	-0.0281896	0.00526513	0.0592854	-0.056716	-0.0155489	-0.0389352	-0.0711388	0.00371375	0.0110456	-0.0376702	0.112226	-0.0628689	-0.0210543	0.0319182	0.0772043
V194	0.0357796	0.0244157	0.0152672	-0.0595232	-0.0708226	-0.0588413	0.0398015	0.0482792	0.12432	0.0394604	-0.0544675	0.0303533	0.0522113	0.0184831	-0.0629144	-0.129225	-0.0419161	-0.0192961	-0.032359	0.0508351	-0.0244556	0.0141399	-0.0266849	0.00329715	0.0031513	-0.0471919	-0.0305928	0.0132181	-0.0155167	0.0194446	-0.0193839	-0.0559497	0.0686792	0.0309292	-0.0467507	-0.0379051	0.0475946	-0.0791129	0.00573874	-0.0396992	-0.0622185	0.0496791	0.023358	-0.0449466	0.102297	-0.0438035	0.0459941	0.0228142	0.0519169
V195	0.0364225	0.0175775	0.0060273	-0.0564342	-0.0747435	-0.0598103	0.0488608	0.049436	0.127474	0.0346272	-0.0530012	0.0405626	0.0598731	0.0266903	-0.0501871	-0.149578	-0.0571987	-0.0156071	-0.0271613	0.014006	-0.0308292	0.0432724	-0.0313787	0.0231759	0.0222007	-0.0249464	-0.0158514	-0.00539111	-0.0200742	0.0350071	-0.0320198	-0.047436	0.0305806	0.0478553	-0.0473095	-0.00849106	0.046762	-0.0573466	0.0208982	-0.0251937	-0.0225033	0.0334343	0.00421997	-0.0518361	0.0769516	-0.0411559	0.0666569	0.0242749	0.0222009
V196	0.0369887	0.0113203	-0.00357904	-0.0556906	-0.0673928	-0.0532266	0.0552678	0.0528618	0.130547	0.0180636	-0.0560182	0.0376468	0.0685381	0.0338719	-0.0487531	-0.156837	-0.0694075	-0.022226	-0.027835	-0.0214306	-0.0522686	0.055394	-0.0269424	0.0347397	0.0269746	0.0253215	-0.00771567	0.0123338	-0.00159393	0.0592121	-0.046258	-0.0281166	-0.0219404	0.0574524	-0.0454501	-0.00546908	0.0175015	-0.0195729	0.0226589	-0.00478335	-0.0126668	-0.0039803	-0.00793035	-0.0615105	0.000512211	-0.0504826	0.0640977	0.0510684	0.0102773
V197	0.038685	0.0115727	-0.00762493	-0.0564917	-0.0628277	-0.0558327	0.0631019	0.0462855	0.118295	0.00483321	-0.0435944	0.0230679	0.0737006	0.0324164	-0.0387448	-0.143553	-0.0675367	-0.0146148	-0.0269435	-0.0363064	-0.0369153	0.0520998	-0.0152623	0.0385617	0.0114115	0.0405589	-0.00783811	0.0402285	0.0144034	0.0463534	-0.0298758	-0.025675	-0.0436828	0.0389522	-0.0412172	0.0103347	-0.0396162	0.0330357	0.0528076	0.0186845	-0.0172297	-0.0012256	-0.0565415	-0.0367736	-0.0570887	-0.0432088	0.0600292	0.0701094	-0.000106598
V198	0.0415677	0.0154367	-0.0132748	-0.0520311	-0.0616139	-0.0457497	0.0624345	0.0556449	0.0912371	0.0158255	-0.0229485	0.0149549	0.0775729	0.0309399	-0.0379746	-0.0985149	-0.0351319	-0.0143781	-0.0291331	-0.0166554	-0.0353215	0.0401703	-0.012225	0.0276613	-0.00911038	0.0495679	0.000215459	0.00225213	0.0202476	0.0454611	-0.0231741	0.00391484	-0.0609568	0.00545803	-0.0228092	-0.00872521	-0.0799506	0.0305233	0.0717956	0.0492613	-0.0352211	-0.00147369	-0.106792	-0.00323069	-0.066908	-0.0122757	0.0483527	0.0526589	0.0310316
V199	0.0441357	0.0230951	-0.0223577	-0.0393197	-0.0639984	-0.0326115	0.0522044	0.0458546	0.0495376	0.0345443	-0.000668641	-0.00361634	0.0663148	0.0354259	-0.0312958	-0.0579582	-0.0081909	-0.0115101	-0.0297443	0.0162935	-0.00363858	0.0458578	-0.0014788	-0.00626029	-0.0260599	0.0585163	-0.0112914	-0.0300357	0.0274909	0.0227826	-0.0385098	0.0122864	-0.0600647	-0.00277693	0.011468	-0.0493053	-0.100657	0.0141399	0.022846	0.0381172	-0.026176	0.0158183	-0.118964	0.00994836	-0.0659921	0.0133224	0.0424642	0.0480446	0.0696441
V200	0.0461705	0.028042	-0.0251188	-0.0252093	-0.0617269	-0.0158392	0.0360469	0.0445544	0.0154058	0.042761	0.0101331	-0.0216069	0.041674	0.033912	-0.0352271	-0.0199797	0.0151098	-0.0353302	-0.00608172	0.0399339	0.0250577	0.0313463	0.0100883	-0.0267765	-0.0224703	0.0378501	-0.0208774	-0.0283956	0.0303188	-0.0244896	-0.0495191	0.0316514	-0.0330798	0.00197439	0.0449974	-0.0954704	-0.0635579	0.00722032	-0.0223277	0.0228001	-0.0220512	0.0236133	-0.127529	0.032713	-0.0549443	0.0334995	0.0408363	0.0480886	0.0691597
V201	0.0452599	0.0313549	-0.026615	-0.0117914	-0.0679908	-0.0016673	0.0148607	0.0477002	-0.00254089	0.0323485	0.0202285	-0.0225485	0.0330549	0.0333863	-0.0132571	-0.00153767	0.0379708	-0.0416513	0.0103708	0.0611078	0.0446414	0.0375496	0.0192632	-0.0363116	-0.00656887	0.0144833	-0.0268484	-0.0549638	0.0475797	-0.0337408	-0.0627134	0.0234702	0.00760818	0.00278515	0.0458502	-0.136538	-0.0272228	-0.0281084	-0.0494652	0.0217644	-0.00811265	0.0277188	-0.122402	0.0610279	-0.0303643	0.0520033	0.0150438	0.0244929	0.0745206
V202	0.0454782	0.0309959	-0.0265765	-0.00693152	-0.0674386	0.0132348	0.00783539	0.0449645	-0.00985974	0.0168359	0.021189	-0.0137962	0.0247772	0.0145208	0.012855	0.0159216	0.0619319	-0.0426842	0.0101846	0.0816176	0.0492225	0.0195252	0.0286252	-0.0444892	0.00962153	-0.0172207	-0.00999319	-0.0475275	0.0474471	-0.0449506	-0.0443893	0.0150761	0.0418993	-0.0134991	0.035037	-0.138053	0.0241636	-0.0607549	-0.0706373	0.0243457	0.00975204	0.03437	-0.102258	0.0612459	-0.000708151	0.0687256	-0.00255266	0.00199647	0.0383513
V203	0.0460664	0.029914	-0.0267537	-0.00867339	-0.0629828	0.0247195	-0.00465673	0.0356907	-0.00903594	-0.0264198	0.0323374	0.00953832	0.00702904	0.00284619	0.027858	-0.00489492	0.0748002	-0.0431905	-0.00799707	0.0886177	0.0274525	0.0238345	0.0146618	-0.0398295	0.0347265	-0.0311246	0.011605	-0.032052	0.0460619	-0.0619484	-0.0243402	-0.000973752	0.0324931	-0.0179917	0.0132088	-0.113857	0.0524628	-0.0677819	-0.0878894	-0.00746584	0.0100143	0.0391379	-0.100107	0.052938	0.00376678	0.0388863	-0.0180925	-0.0140571	-0.00896726
V204	0.0467489	0.0273876	-0.0234516	-0.00888239	-0.0602064	0.0283562	-0.00477679	0.0229461	-0.00802919	-0.0483432	0.0287482	0.00660326	0.00933566	-0.00430058	0.0199303	-0.00938974	0.0554521	-0.0533661	-0.020638	0.0899889	-0.000190714	0.0322137	0.00853826	-0.027486	0.0527964	-0.0382821	0.03858	-0.0295517	0.0613482	-0.049152	-0.0272085	-0.0220693	0.0478118	-0.0512892	0.01358	-0.0796092	0.0590578	-0.0294014	-0.0625175	-0.0158823	0.0306387	0.0362296	-0.0805045	0.0557242	-0.0175378	-0.00782811	-0.0481323	0.00695598	-0.0769625
V205	0.0482964	0.0212265	-0.0211247	-0.0102296	-0.0522968	0.0307038	-0.0121751	0.012727	0.00139531	-0.0641304	0.025502	0.0125753	0.0236183	-0.00824977	0.00719193	-0.0278135	0.037168	-0.0313714	-0.0162955	0.0729537	-0.016617	0.0252885	0.017675	-0.013727	0.06225	-0.0429812	0.0383621	-0.0400484	0.0510799	-0.0164325	-0.022238	-0.0295793	0.0345307	-0.0661202	0.0169764	-0.0452228	0.0548162	-0.0026576	-0.0204149	-0.00507813	0.0432551	0.0369216	-0.0451075	0.0310983	-0.0095748	-0.0371645	-0.0298207	0.00794206	-0.14968
V206	0.0485014	0.0220622	-0.0218912	-0.00185933	-0.0439049	0.0387377	-6.07422e-05	0.0127174	0.00369394	-0.0612266	0.0262489	0.00428404	0.0352537	-0.0145666	0.00137988	-0.0411697	0.0145731	-0.029335	-0.0194255	0.047091	-0.0349488	0.0151553	0.0261242	-0.00623055	0.0564011	-0.0217967	0.048049	-0.0671377	0.0251165	0.0210287	-0.0106406	-0.0378516	0.0330881	-0.0786317	0.0228276	-0.00542938	0.0447418	0.0191714	0.0113315	-0.00645611	0.0405937	0.0360204	0.0121299	0.023481	0.00550666	-0.0403761	0.00488192	0.00904536	-0.166938
V207	0.0488916	0.0240445	-0.0228699	-0.00414161	-0.0299678	0.0354062	0.00212983	0.0110935	0.0191584	-0.0452107	0.0347197	-0.00897428	0.0386241	-0.0394985	0.000336056	-0.0491871	0.0121047	-0.033668	-0.0402262	0.0284807	-0.0427825	-0.0002807	0.0297144	-0.0219614	0.0401378	-0.0245272	0.0263519	-0.0709313	0.0157848	0.0515947	-0.0186817	-0.0185623	0.0410433	-0.0843518	0.00495396	0.0203449	0.0386883	0.0318259	0.0222379	0.0118124	0.0289306	0.0452419	0.0380906	0.0176779	0.0308195	-0.00699209	-0.000637133	-0.0082265	-0.137546
V208	0.0482825	0.0283255	-0.0279619	-0.00447233	-0.0234813	0.0333693	-0.00030611	0.0147702	0.0111804	-0.0308163	0.0163749	-0.0174431	0.0511137	-0.0232761	-0.00525471	-0.0502583	0.0183995	-0.0269632	-0.0293524	0.0183891	-0.0136693	0.0193046	0.0398839	-0.0329635	0.0247845	-0.0279238	0.0155791	-0.0756642	0.00069473	0.0823195	-0.038496	-0.0189713	0.0371219	-0.0931861	-0.0143402	0.0576519	0.0107725	0.0383734	0.00934046	0.0153973	0.0208646	0.0537001	0.0692533	-0.00323309	0.0534627	0.0233438	-0.00374641	-0.0337721	-0.0790783
V209	0.0470613	0.0302698	-0.0331207	-0.00369868	-0.019105	0.0420655	-0.00585855	0.023266	0.00625748	-0.0100261	-0.00202686	-0.0122101	0.0535389	0.00592328	-0.0164864	-0.0348847	0.0310166	-0.025687	-0.0046171	0.0250611	-0.0218832	0.0111663	0.047915	-0.0681636	0.00281323	-0.0584703	-0.0109358	-0.0782741	0.0133672	0.0855927	-0.00914608	-0.0260619	0.0141511	-0.0876168	0.0110041	0.0829958	0.0110755	0.0230161	0.0315933	0.0243228	0.0122389	0.05322	0.0801503	0.0016462	0.0729264	0.0835423	-0.0247135	-0.0527875	-0.015763
V210	0.0459885	0.031687	-0.0329586	-0.00293503	-0.0240324	0.0498344	-0.0189032	0.0273372	0.0131204	0.0198938	-0.00374454	-0.0148573	0.0473136	0.017838	-0.00191498	-0.00675876	0.040342	-0.0235367	0.00841067	0.0424265	0.000100233	-0.00616707	0.0591579	-0.0671038	-0.0205801	-0.0844843	-0.025379	-0.0959287	0.0184268	0.0486239	0.00218449	-0.0486817	0.00999077	-0.0720656	0.0330605	0.0642783	-0.0232817	0.0221212	0.0361932	0.0236264	-0.0125777	0.0503514	0.030195	0.0238423	0.0762844	0.0966376	-0.0149547	-0.0610573	0.0266974
V211	0.0453839	0.0320255	-0.0329099	-0.00168781	-0.0254727	0.0597982	-0.0187066	0.0356073	-0.00369686	0.0333422	-0.0168184	-0.0136868	0.0281784	0.0230491	0.0133296	0.00754992	0.0524515	-0.0104338	0.0244822	0.0482002	-0.00087765	-0.0165688	0.0513947	-0.0682244	-0.0420319	-0.0965204	-0.030697	-0.0791063	0.0253656	0.0235457	0.0134369	-0.067562	-0.021008	-0.0327716	0.0282411	0.0418365	-0.0373839	0.0212972	0.025085	0.0115688	-0.0184795	0.0459258	0.0267387	0.0185277	0.0544456	0.110097	-0.0317107	-0.0306553	0.0526032
V212	0.0459397	0.0269001	-0.0349322	-0.00219469	-0.0272565	0.069777	-0.018955	0.0382572	-0.0222303	0.0445865	-0.0230414	-0.024597	0.0114611	0.0250228	0.0204424	0.0146108	0.0286559	-0.00528408	0.0254201	0.0534872	-0.00142799	-0.0347239	0.0329504	-0.0595048	-0.0408876	-0.0927331	-0.0313357	-0.0480082	0.0419789	0.0207359	0.021271	-0.0683304	-0.0546795	-0.00676903	0.0260504	0.0167084	-0.0477194	0.0322992	0.0107937	0.0185843	-0.0195086	0.0247936	0.0153069	0.0022272	0.0301054	0.100628	-0.0398524	-0.00863354	0.0398338
V213	0.04646	0.0216269	-0.0361544	-0.00627773	-0.0292612	0.0657235	-0.0220724	0.0298138	-0.0262378	0.0174465	-0.0326018	-0.0344506	0.00609792	0.0274956	0.0168712	0.0210993	0.0174695	-0.0137479	0.0278439	0.064052	-0.0391573	-0.0509298	-0.00482385	-0.0544061	-0.0295837	-0.0921455	-0.0220366	-0.0129031	0.0713905	0.00412975	0.0258304	-0.0608185	-0.0794384	0.00596172	0.0225353	0.0120631	-0.0647275	0.0644758	0.0213721	0.0332683	-0.0477031	0.00294721	0.00612427	-0.00573074	0.012606	0.0590142	-0.071505	0.0310403	0.0231651
V214	0.0465447	0.0179422	-0.0340212	-0.0128959	-0.0266019	0.0540261	-0.0283022	0.0310007	-0.0177076	0.00701494	-0.0409027	-0.0420725	-0.00402637	0.0118209	0.0154874	0.0339853	0.0186519	-0.00335604	0.0247591	0.0716361	-0.046339	-0.0692811	-0.039719	-0.0517152	-0.0240489	-0.0944616	-0.0127063	0.0185606	0.104882	0.00169328	0.0112147	-0.0626663	-0.0776594	0.0099321	-0.00336376	-0.0352501	-0.0780354	0.0575984	0.0522198	0.0194012	-0.0812455	0.0151569	-0.00474941	0.0244929	0.000716091	0.0248144	-0.0529349	0.0516358	-0.0122924
V215	0.0474799	0.016599	-0.0323299	-0.0216271	-0.0239539	0.0407421	-0.030596	0.02	-0.0172351	-0.00157409	-0.0303095	-0.0469204	-0.0271484	-0.00218451	0.0114567	0.0240645	0.0198805	0.0214068	0.0161288	0.0721294	-0.0373288	-0.0724209	-0.0500074	-0.0516143	-0.0249744	-0.0821116	-0.0185428	0.0270589	0.10259	0.0028122	-0.00829246	-0.04525	-0.0522592	-0.00168073	-0.0267134	-0.0410121	-0.0846823	0.0522887	0.065405	0.00553489	-0.0928335	0.0070596	-0.0109571	0.0328562	0.0148062	-0.00133386	0.00871448	0.0351306	-0.0344749
V216	0.0482684	0.0181248	-0.0358917	-0.0245176	-0.0184911	0.0339094	-0.0406232	0.0247293	-0.0177451	0.0016613	-0.0113194	-0.0417619	-0.047635	-0.0183541	0.000636275	0.0035997	0.0336792	0.0301551	0.00686247	0.0443119	-0.0342954	-0.0536176	-0.0556499	-0.0432519	-0.00624469	-0.0636742	-0.0132182	0.0285795	0.0892829	0.00577865	-0.0402986	-0.0221673	-0.0203637	0.00608844	-0.0664647	-0.0551251	-0.0421609	0.0197705	0.020587	0.00506543	-0.0875807	0.000589671	0.0236057	0.0190995	0.0218734	-0.00754779	0.0514027	0.0237736	-0.0293903
V217	0.0492926	0.0184963	-0.0365583	-0.0222576	-0.01311	0.0257118	-0.0478172	0.0208439	-0.0115504	0.00260637	-0.00416719	-0.0395541	-0.0485078	-0.00942686	-0.00955085	-0.0266158	0.0282015	0.0371094	-0.00196697	0.00770976	-0.0207365	-0.0254623	-0.0359571	-0.0366538	-0.0108863	-0.0425322	-0.00591451	0.0235882	0.0750782	-0.00538537	-0.0628514	-0.0137542	-0.00593443	0.00895062	-0.0912809	-0.0437611	0.00129225	0.00774805	-0.0177819	-0.0162193	-0.0606393	0.00123459	0.0506617	0.00377952	0.0326151	0.00701168	0.0803874	0.00831367	-0.0286235
V218	0.0503121	0.0179756	-0.0370609	-0.0156238	-0.0120206	0.0184798	-0.0481814	0.0187684	-0.0027085	-0.000334931	0.00789131	-0.0322889	-0.044687	-0.0216414	-0.0085923	-0.0290757	0.0305748	0.0283932	-0.00731859	-0.0159158	0.00138898	-0.0211707	-0.0115058	-0.0295641	-0.00223616	-0.0384518	0.00453981	6.20085e-05	0.0483589	-0.00903552	-0.0630432	-0.0141676	0.0077916	0.00567151	-0.0945865	-0.0378589	0.0293957	-0.0111604	-0.0185048	-0.0149418	-0.0456903	-0.00693542	0.0576056	0.00244093	0.0458683	0.0119359	0.0733973	-0.0218157	-0.014101
V219	0.0512381	0.0165756	-0.0383235	-0.00491254	-0.0152229	0.00870199	-0.0476881	0.0115373	-0.00385625	-0.00365675	0.0150761	-0.0221239	-0.0264702	-0.0215156	0.00168224	-0.0276112	0.0254045	0.0177091	-0.00724826	-0.0299215	0.00425084	-0.00739872	0.00997334	-0.0215017	0.00438335	-0.0204325	0.00611962	-0.00785514	0.0305572	-0.00477834	-0.051443	-0.0151014	0.0104742	0.00844825	-0.0944479	-0.013244	0.0316784	-0.0181538	-0.0377103	-0.0193448	-0.013252	-0.0106135	0.0512678	0.000110808	0.0633887	0.0135531	0.0496237	-0.0286425	0.00895856
V220	0.0518133	0.0149028	-0.0402188	0.00622899	-0.0164622	0.0024936	-0.044183	0.00703465	-0.0123683	-0.013183	0.0163005	-0.0129286	-0.0170934	-0.0200643	0.000706931	-0.0284304	0.0186978	0.00117157	0.000263628	-0.0309233	0.00135249	-0.00117121	0.0205504	-0.00674962	0.00966215	-0.0098279	0.00299832	0.00605599	0.0154842	-0.0103427	-0.0350925	-0.0097528	0.0100368	0.00441638	-0.0819616	0.00364585	0.0186535	-0.0190731	-0.0437716	-0.0218177	-0.00115862	-0.00640046	0.0450145	-0.0105382	0.0567714	0.00957446	0.0388077	-0.0244373	0.0232754
V221	0.0521806	0.0135148	-0.0409265	0.0145635	-0.0175973	-0.000498957	-0.0422232	0.00558217	-0.0170125	-0.0198577	0.00981134	-0.0114412	-0.00254746	-0.0103537	-0.00257989	-0.022859	0.00647265	-0.0081322	0.00495307	-0.0312188	-0.00110025	0.010423	0.0228865	0.00536043	0.0124327	0.00298326	-0.00312158	0.00438077	0.0134441	-0.00981689	-0.0251849	-0.00297562	0.00223372	0.00928605	-0.0560503	0.00742208	-0.0027383	-0.0209067	-0.0182985	-0.0227764	0.00846853	-0.00217446	0.0310345	-0.0146273	0.0452705	0.00410906	0.02826	-0.00954655	0.0379037
V222	0.0524932	0.011403	-0.0401975	0.0214175	-0.0164178	-0.0047342	-0.0353409	0.0059021	-0.0238852	-0.0237815	-0.00496626	-0.0207752	0.00412112	-0.00578	0.00139649	-0.00387907	0.00224373	-0.00933551	0.0111083	-0.0302054	-0.00555232	0.00348068	0.0250512	0.0189717	0.0119114	0.00847462	-0.00618771	0.0146165	0.0147028	0.00309181	-0.0216998	0.00753534	-0.000455562	0.0120152	-0.0306943	0.00996931	-0.020239	-0.0232524	0.0149795	-0.0134832	0.0143925	0.00544856	0.0262252	-0.0221393	0.0335084	-0.00690187	0.0325357	0.00401796	0.0314034
V223	0.0521898	0.010873	-0.0404338	0.0261179	-0.0138624	-0.00513693	-0.0286465	0.0145466	-0.0310185	-0.0240759	-0.0160292	-0.0234425	0.00401074	-0.00959178	0.00808162	0.010323	0.00335262	-0.0111825	0.0148901	-0.0270929	-0.00897606	0.000310247	0.0297755	0.0287917	0.00736611	0.0192116	-0.0125511	0.0257024	0.012703	0.00782039	-0.00868243	0.0165092	-0.0138852	0.0232358	-0.0221271	0.0111214	-0.0291313	-0.0299945	0.0342927	-0.0192157	0.0263963	0.0123079	0.0201723	-0.0377758	0.0243429	-0.0148011	0.0392461	0.0195148	0.0221912
V224	0.0517781	0.0117397	-0.0406136	0.0261982	-0.0138106	-0.00369454	-0.0183497	0.0193209	-0.031814	-0.0212899	-0.0275826	-0.0314406	6.69455e-05	-0.0160395	0.0135703	0.023512	0.00287853	-0.0150171	0.00863719	-0.0236059	-0.00707024	-0.00574224	0.0209859	0.025592	0.00131207	0.0320373	-0.0174298	0.0340819	0.020115	0.0057565	-0.00809737	0.0322941	-0.0192239	0.0140022	-0.0158483	0.0128125	-0.0356394	-0.0332326	0.0500207	-0.020079	0.0414545	0.0174032	0.0164591	-0.0593122	0.00672517	-0.0126382	0.0425493	0.0287078	0.0195316
V225	0.0516362	0.0101658	-0.039235	0.0200298	-0.0134526	-0.000820991	-0.0164278	0.0279533	-0.0310377	-0.0156432	-0.0420888	-0.0306046	-0.00576102	-0.0132057	0.00693271	0.0322324	0.00350883	-0.00399708	-0.00170079	-0.0237543	0.00117429	-0.0130194	0.0136941	0.0222058	-0.00341922	0.0369643	-0.0297777	0.0366463	0.0320126	0.000891494	-0.00821155	0.0506151	-0.027975	0.000866022	-0.0145279	0.00437487	-0.0316231	-0.0262941	0.0561991	-0.0170869	0.050456	0.020049	0.0136961	-0.0756495	-0.00459573	-0.0142609	0.0605569	0.0319896	-0.000325452
V226	0.0510847	0.00898512	-0.0394357	0.0141682	-0.0138611	0.00173429	-0.0166199	0.0375456	-0.0349181	-0.0144344	-0.0477983	-0.0216655	-0.00650961	0.000832056	0.00352734	0.0326385	0.00968233	0.00808829	-0.00211395	-0.025164	0.000114542	-0.0310677	0.0135327	0.00840995	-0.00843713	0.0392221	-0.0311452	0.0254273	0.0356848	-0.0128813	0.000970651	0.070649	-0.0330455	-0.00066698	-0.0059817	0.0134717	-0.0122821	-0.0200209	0.0437309	-0.0181891	0.0497365	0.00854261	0.023581	-0.0854458	-0.031351	-0.0147128	0.0887458	0.0368636	-0.0143745
V227	0.050709	0.0101066	-0.0375268	0.00546122	-0.0135122	0.00386217	-0.0169909	0.0488931	-0.0350218	-0.0103499	-0.0391246	-0.00986969	-0.0112304	0.00618535	0.0157285	0.0169048	0.0155076	0.0145855	-0.0151852	-0.0266348	0.00313569	-0.0451628	0.0234853	-0.00950657	-0.00235051	0.0259074	-0.0266234	0.00162018	0.0331715	-0.0318158	0.00759837	0.0930599	-0.0262337	0.00683905	-0.00574758	0.0179297	0.0105375	-0.028702	0.0194674	-0.0128089	0.0507636	-0.0182656	0.0393824	-0.0893314	-0.0471443	-0.00426064	0.104414	0.0358621	-0.0258478
V228	0.0504297	0.0115071	-0.0361964	-0.00302288	-0.0094847	0.00112271	-0.0184791	0.0586045	-0.0369241	-0.00338899	-0.0233957	-0.0020119	-0.0123749	0.0250275	0.0158201	-0.0120565	0.00804424	0.0211135	-0.0307409	-0.0332369	-0.00257754	-0.0425386	0.0394477	-0.0162514	0.00536882	0.0221755	-0.0105983	-0.0249798	0.019172	-0.0411032	0.0125377	0.089886	-0.0160523	0.0223636	-0.0106064	0.0194539	0.00605745	-0.026837	-0.0126629	-0.0103118	0.0507926	-0.0340066	0.0638191	-0.0792623	-0.0468114	-0.00796248	0.0889595	0.0407403	-0.0258605
V229	0.0498545	0.0116078	-0.0320809	-0.0134578	-0.00352636	-0.000638122	-0.0154869	0.0644975	-0.0463178	-0.0093494	-0.000952387	0.0204227	-0.00568136	0.0337484	0.0164618	-0.0514505	-0.00146327	0.00958231	-0.0428244	-0.0377361	-0.0199039	-0.0363273	0.0384663	-0.0291958	0.0244626	0.0165602	-0.00118218	-0.0395707	0.00190057	-0.0252052	0.0321225	0.0805455	-0.0139961	0.0474494	-0.00990675	0.0155684	0.0172193	-0.0306309	-0.0330227	0.00881431	0.0551378	-0.0535019	0.094444	-0.0678719	-0.0477341	0.00502565	0.0464805	0.0331163	-0.0308155
V230	0.0494665	0.0122988	-0.0239969	-0.012678	-0.003044	-0.0123338	-0.0181889	0.0687756	-0.0529473	0.000808632	0.029725	0.0373748	0.0125477	0.0393429	0.0260387	-0.0796415	-0.01663	-0.00275129	-0.0509587	-0.0410875	-0.0100868	-0.0285698	0.0386807	-0.0263948	0.052839	-0.000655767	0.0157826	-0.0515466	-7.26044e-05	-0.0144159	0.0329796	0.0650825	-0.0043695	0.0529785	0.00128282	-0.00302371	-0.00431217	-0.0475797	-0.0530643	0.0294298	0.0526438	-0.0706796	0.0776825	-0.0487966	-0.0347318	0.017668	0.00274868	0.0268135	0.0127903
V231	0.048159	0.018191	-0.0173574	-0.0126379	-0.00658617	-0.0272614	-0.0228866	0.0706659	-0.0569865	-0.00249462	0.0335546	0.057781	0.0359376	0.0383665	0.031453	-0.0873846	-0.0189332	-0.0139514	-0.0240409	-0.0334832	-0.0159136	0.0031062	0.0369209	0.000922506	0.0930663	-0.0314426	0.0310987	-0.0534335	-0.00280272	-0.00348423	0.0286995	0.0422363	0.00963591	0.0670184	0.015588	-0.0239259	-0.0234791	-0.0684162	-0.036198	0.0285791	0.0448736	-0.0436367	0.0601606	-0.0162418	-0.0164567	0.0484936	-0.0362171	0.0312288	0.0355062
V232	0.0469031	0.0202532	-0.0121403	-0.0137687	-0.00609927	-0.0272799	-0.020174	0.0775718	-0.0660049	0.00633576	0.0255956	0.0637865	0.051656	0.0304088	0.0403959	-0.0809407	-0.0260374	-0.0308726	-0.0015044	-0.0199159	-0.000634615	0.0126234	0.0148947	0.0452729	0.112083	-0.0368717	0.0254351	-0.0293247	0.0010115	0.0278778	0.0302344	0.0310581	0.0558414	0.075917	0.00780126	-0.037571	-0.0353993	-0.0834685	-0.0127511	0.0272558	0.0367319	-0.0302702	0.0472879	-0.0132666	-0.0400198	0.0586449	-0.0156553	0.0172022	0.0364857
V233	0.0453689	0.0210671	-0.00636168	-0.0223457	-0.00333458	-0.0183272	-0.0300113	0.0805226	-0.0830821	0.00613682	0.0252052	0.0499897	0.0600822	0.0284456	0.0519111	-0.0681819	-0.0397176	-0.0545238	0.0228202	-0.0145134	0.00391131	0.0196633	-0.0181819	0.0819037	0.0993924	-0.0358485	0.0279938	-0.0125696	0.00708046	0.0471737	0.0356274	-0.00488275	0.0805318	0.0800128	-0.000993924	-0.0211299	-0.0498606	-0.0607602	0.00888214	0.0368631	0.0454427	-0.00194542	0.0172399	-0.054944	-0.0501081	0.0708912	-0.0078826	0.00379471	0.013151
V234	0.0447212	0.0211906	-0.00114571	-0.0288412	-0.00261406	-0.00316057	-0.0324191	0.0878885	-0.0711383	0.0161281	-0.00918043	0.020828	0.0781423	0.0193838	0.050298	-0.0344874	-0.0228355	-0.0672419	0.0424079	-0.00495146	0.0224565	0.0200938	-0.0550284	0.108024	0.0801119	-0.0403155	0.0417649	0.00279343	0.020751	0.0224381	0.0314498	-0.0331748	0.0640567	0.0681364	-0.00689049	-0.0297306	-0.0210611	-0.0577704	0.0261493	0.0258624	0.0616747	0.0464388	-0.00591658	-0.0998383	-0.0583775	0.0610963	0.0066729	-0.0308845	0.0191445
V235	0.045492	0.0164491	0.00913313	-0.0415237	-0.00851076	0.0224062	-0.0247328	0.0677234	-0.0521978	0.0174282	-0.0439794	-0.0106029	0.0810599	-0.00584796	0.0274161	-0.0136214	-0.0128615	-0.0685821	0.0669703	0.0199524	0.0464272	-0.00117961	-0.0789389	0.101773	0.0363251	-0.051461	0.0387148	0.0440024	0.011767	-0.00337691	0.0251783	-0.0448708	0.0302512	0.0345699	-0.00029836	-0.0208343	-0.0342877	-0.00264301	0.0769377	0.0120353	0.0906427	0.0597668	-0.0271926	-0.133662	-0.0557013	0.0464962	0.0421181	-0.0340169	-0.000133072
V236	0.0443579	0.0126736	0.0102647	-0.0512154	-0.0116068	0.0349947	-0.00753839	0.0613023	-0.0365882	0.0090851	-0.0501215	-0.00378407	0.0763428	-0.0292263	0.00847976	0.0119625	-0.00194462	-0.0682473	0.0932488	0.052585	0.062831	-0.00710139	-0.0692816	0.0931248	0.0488094	-0.0608146	0.0207048	0.0964054	-0.0114907	-0.0319356	0.0313416	-0.060149	0.0347293	0.000688729	-0.0196593	-0.00885376	-0.0366987	0.0332277	0.0745263	0.00854021	0.0755952	0.0607769	-0.0216266	-0.14174	-0.0462654	0.00731545	0.0601256	0.0142081	-0.000574444
V237	0.0454077	0.00708994	0.0139272	-0.0570432	-0.00673277	0.0480871	-0.0064773	0.056251	-0.00779686	-0.0125384	-0.0481452	-0.00828405	0.0748796	-0.00973311	-0.0168259	0.00155017	0.00875025	-0.0554693	0.097338	0.0515292	0.0569929	-0.00603335	-0.0298149	0.0556163	0.0315609	-0.0545842	-0.00523901	0.140874	-0.0125485	-0.0431647	0.00988147	-0.0439553	0.0183933	-0.00748869	-0.0210983	0.0206464	-0.0274067	0.0767305	0.0274984	0.0114857	0.0368765	0.0393795	-0.0297912	-0.124241	-0.0327618	0.00839922	0.034786	0.0213858	0.00733424
V238	0.0446897	0.00637028	0.016272	-0.070054	-0.00741231	0.0536741	0.0195824	0.049134	0.0153958	-0.0397793	-0.0324564	-0.00859469	0.064149	-0.00381167	-0.0346582	0.00950489	0.0150942	-0.0200822	0.0722482	0.0626172	0.0950571	-0.0183461	-0.0134193	0.00693264	0.0392693	-0.0483139	-0.0228021	0.118586	-0.0228525	-0.0480375	0.00176382	-0.0221808	0.00465851	-0.044561	-0.0054885	0.051892	-0.0156533	0.0999595	0.0405499	0.0242946	-0.00342785	0.0243478	-2.91491e-05	-0.0803488	-0.0318591	0.00365052	0.0406462	0.0139082	0.0206685
V239	0.0430921	0.00457531	0.0245209	-0.0817703	-0.00825325	0.0504461	0.0484806	0.0496745	0.0491549	-0.0460798	-0.0154064	-0.00789399	0.0835162	-0.00127736	-0.014763	0.0364054	0.0188731	0.0231417	0.0320276	0.0267165	0.0969369	-0.034701	0.033252	-0.017273	0.0561324	-0.0241835	8.94757e-05	0.07018	-0.00921962	-0.0241543	0.00538358	0.00432569	0.00990679	-0.032437	-0.00426232	0.0639859	-0.0234011	0.10418	0.0546001	0.0176689	-0.00467637	0.0120521	0.0324863	-0.044847	-0.0164705	-0.0382124	0.0420198	0.0177978	-0.0138575
V240	0.0387419	0.0140568	0.0344623	-0.0864032	-0.00270239	0.0391688	0.079519	0.0605109	0.0494959	-0.0558781	0.0150277	-0.000712772	0.0763299	-0.00615679	0.0244881	0.0315783	0.016932	0.0690916	-0.00159603	-0.0040743	0.11296	-0.0535564	0.0975485	-0.0524549	0.0524363	0.00433401	0.010731	0.0603889	-0.00135444	-0.00253007	0.0114618	0.000590947	0.00903818	-0.0296537	-0.0127301	0.0495885	-0.0436004	0.0940473	-0.00106475	0.0268877	-0.00406598	0.00343732	0.0708792	-0.0437665	-0.010243	-0.0352288	0.0225482	0.0110269	-0.0266274
V241	0.0316194	0.0220387	0.0432781	-0.0918481	-0.00619896	0.0364994	0.0982878	0.0776832	0.049954	-0.0418382	0.0188598	0.0134117	0.0708808	-0.0318843	0.0435443	0.0162107	-0.00124139	0.102358	-0.0420086	-0.0216579	0.160465	-0.0514889	0.093311	-0.0771741	0.041618	0.0307279	0.012265	0.0174041	0.0225093	0.0132632	0.00723699	-0.0100402	-0.0015079	-0.0239891	-0.00416935	0.0160733	-0.0496867	0.0738242	-0.0477971	0.0158113	0.0180669	0.0270209	0.0740444	-0.0405319	0.00661515	-0.0333436	0.00657736	-0.00766636	-0.00673147
V242	0.0277247	0.0269927	0.0528507	-0.0948504	0.00545565	0.0255555	0.096436	0.0723612	0.0407788	-0.0361502	0.00230805	0.00348456	0.0533489	-0.0268825	0.0780898	-0.00627989	-0.0184055	0.117005	-0.0552679	-0.0463704	0.159088	-0.0874895	0.0602584	-0.0861671	0.0371782	0.039899	0.0290724	-0.0117137	0.0432226	0.0112945	-0.00958283	-0.00913018	-0.00312429	-0.0118798	0.0135344	-0.039395	-0.00868685	0.065215	-0.0677848	0.0314603	-0.0129884	0.0464903	0.0715835	-0.0245252	0.00140572	-0.0303535	0.00756801	-0.0207155	-0.0177216
V243	0.026139	0.0291314	0.0547901	-0.0892864	0.0107919	0.0237838	0.0922148	0.0925377	0.00900499	-0.0270035	-0.0236885	0.022251	0.0335884	-0.0382301	0.0867594	-0.0332294	-0.035551	0.117383	-0.0439124	-0.0778394	0.136525	-0.10429	0.0344416	-0.0901158	0.0107819	0.0199692	0.0243707	-0.0439136	0.047914	-0.00391671	0.0152895	-0.0101892	-0.00290769	0.000684668	0.0345628	-0.091933	0.0541525	0.0425553	-0.0424424	0.0422478	-0.0243779	0.045869	0.0908293	-0.0014684	-0.0133535	0.00122734	0.00459935	0.0113578	-0.0476789
V244	0.0276713	0.0263309	0.064407	-0.0775033	0.0265668	0.0121964	0.0738113	0.0875799	-0.00385017	-0.0549255	-0.0567057	-0.0224513	0.0240748	-0.0452271	0.0991789	-0.0650833	-0.0342085	0.055304	-0.0158916	-0.0768575	0.104592	-0.0774636	-0.00613746	-0.0829867	0.00496196	-0.0114458	0.0342274	-0.0712955	0.0315298	-0.0128945	-0.00596827	-0.00925831	-0.00814244	0.0146868	0.0304152	-0.112662	0.102182	0.0069903	-0.0528563	0.0770667	-0.0376278	0.0387217	0.115098	-0.0461974	0.00393584	-0.00870889	-0.0504138	0.0321313	-0.0577175
V245	0.0310342	0.0155116	0.0658298	-0.0616112	0.0532227	0.0247114	0.0512973	0.0733962	-0.00463707	-0.0541214	-0.103689	-0.0777294	-0.051207	-0.00922362	0.0793593	-0.0831999	-0.0342785	0.00538998	-0.016771	-0.0707528	0.021798	-0.0348192	-0.0521323	-0.0210552	-0.0395803	-0.0384283	0.0406194	-0.0531662	0.0196063	-0.0316381	0.0179422	-0.0420286	0.00421749	-0.00739208	0.0225102	-0.0854795	0.110417	-0.0160069	0.0151521	0.118074	-0.00926572	0.02573	0.0687173	-0.0447814	0.0668615	-0.00148953	-0.0686266	0.0242049	-0.0454957
V246	0.0320716	0.00562667	0.063904	-0.0466333	0.0609796	0.0294312	0.0403244	0.0632129	0.00643976	-0.0587267	-0.10242	-0.0831494	-0.0888023	0.0116912	0.0871757	-0.103015	-0.0119345	-0.00813605	-0.00523606	-0.0477495	-0.0332343	-0.0124269	-0.0577541	0.0319969	-0.0658966	-0.0167185	0.0249509	-0.0346133	-0.0174374	-0.0261814	0.0353499	-0.0603326	-0.0357685	-0.0484832	0.0134968	-0.039468	0.0713843	-0.028144	0.0363129	0.1319	-0.0146804	-0.00211127	0.0137615	-0.0400381	0.055162	-0.000452794	-0.0812013	-0.0117645	-0.00222076
V247	0.0315399	-0.00342618	0.0684942	-0.02696	0.0545184	0.0332587	0.0599163	0.0489336	0.02909	-0.054798	-0.116013	-0.0844098	-0.0937483	0.00252836	0.0941697	-0.103225	0.0343104	-0.0347912	-0.0192675	-0.0177531	-0.0471259	-0.0108425	-0.0486548	0.0830707	-0.071557	0.0121609	0.0108683	-0.0271665	-0.0275052	-0.0318632	0.018344	-0.0522924	-0.0746334	-0.0630516	-0.00204647	0.017395	0.075058	-0.0344953	0.0102423	0.0848533	-0.0107159	-0.0427696	-0.01217	-0.0261038	0.0610316	0.053475	-0.0384918	-0.0302507	0.0191566
V248	0.0295647	-0.0061912	0.0676083	-0.00598944	0.0500388	0.0286304	0.0772165	0.0270266	0.0465246	-0.031174	-0.11543	-0.121252	-0.0541205	0.00430901	0.0949072	-0.0914447	0.0687672	-0.0281975	-0.00844731	-0.00543946	-0.0969058	0.0189411	-0.0598542	0.120655	-0.0383584	0.0584072	0.019905	-0.0309209	-0.00020581	-0.0255248	0.026981	-0.0457268	-0.0790798	-0.0595304	-0.0309526	0.0669948	0.0250632	-0.0388119	0.0190085	0.0321712	-0.0153201	-0.0663456	-0.0161467	-0.0124019	0.0850144	0.0517572	-0.0441312	-0.0153685	0.0235641
V249	0.0279991	-0.00850872	0.0609025	0.000456124	0.0324454	0.0401143	0.11429	0.00791949	0.0337277	0.00364529	-0.120737	-0.141753	-0.00909391	0.025107	0.0813307	-0.0418221	0.0802716	-0.0361584	0.0200156	-0.00497631	-0.111662	0.0423742	-0.0697688	0.125294	0.0205885	0.0930313	0.0191824	-0.0316347	0.00454953	0.00295907	0.0231655	-0.0152439	-0.0444922	-0.0277092	-0.0497094	0.0896517	-0.0134236	0.00253806	0.0291853	0.00836725	-0.0340779	-0.0690069	-0.0424818	0.0245538	0.0932383	0.0391194	-0.0277028	-0.00614279	-0.0824266
V250	0.0254254	-0.00691623	0.0575526	0.00785136	0.0295495	0.0508867	0.12647	0.000485311	-0.0354713	0.0553656	-0.0840225	-0.164723	0.0326083	0.02797	0.0711535	0.0164646	0.11361	-0.000145442	0.0164659	-0.0138682	-0.0614067	0.0513193	-0.0533483	0.0699749	0.0298957	0.152427	0.0312183	-0.0711728	0.0392528	0.0237664	-0.00678067	-0.00237401	-0.0567935	0.00843509	-0.0677498	0.0660971	-0.111632	-0.00493677	-0.0156873	-0.00970547	-0.0425487	-0.0621726	-0.0508303	0.0284481	0.0853111	0.0104687	-0.0101669	-0.00087048	-0.100715
V251	0.0228928	-0.00318536	0.0535772	-0.00188977	0.0173629	0.0413533	0.115404	-0.0277837	-0.0771019	0.101733	-0.104978	-0.150596	0.0647584	0.0300612	0.0546343	0.0722223	0.122206	0.0263643	0.0319932	-0.00755641	0.00274967	0.0939772	-0.00561997	0.00945866	0.0508076	0.140409	0.0352585	-0.08992	0.0397798	0.0442258	-0.043236	-0.00531021	-0.0719522	0.0382074	-0.0994992	0.0220492	-0.118275	-0.0336522	-0.0352765	-0.0081233	-0.023212	-0.0166784	-0.0522725	0.0235579	0.0642099	-0.0159354	0.0226929	-0.0181555	-0.0373732
V252	0.0186061	0.00161548	0.0567548	-0.0133618	0.00868694	0.0363849	0.0982579	-0.054084	-0.131627	0.086772	-0.150143	-0.0918657	0.0484042	0.0353385	-0.0336134	0.103338	0.102665	-0.00953355	0.0339324	0.026219	0.0567715	0.131031	0.0748215	-0.0293213	0.0642529	0.0995339	0.0340977	-0.0891115	0.0279019	0.0404866	-0.0479879	0.0123758	-0.031888	0.0373615	-0.113733	-0.0156376	-0.121532	-0.0493807	0.00339991	-0.0134971	-0.0301104	-0.02782	-0.0355824	0.00878542	0.0301919	-0.0391475	0.0499683	0.0142154	-0.00379247
V253	0.0173638	-0.0052951	0.0554807	-0.0283214	0.00343442	0.0152417	0.055183	-0.0708177	-0.178395	0.0579063	-0.150374	-0.00491143	0.0579997	0.0158113	-0.104567	0.0837645	0.0549335	-0.0693218	0.0231096	0.00935074	0.088075	0.10535	0.107539	-0.0538087	0.0298477	0.0440017	0.0316563	-0.0432624	0.0128059	0.065888	-0.0600142	-0.0507391	0.0510785	0.0747687	-0.123701	-0.0523973	-0.0537314	-0.0292568	0.0653857	-0.0173013	-0.0739277	-0.039892	-0.0441737	0.0368278	-0.0444016	-0.0484857	0.0132777	0.038319	-0.0375187
V254	0.0176001	-0.00416483	0.0566949	-0.0480775	0.00457061	-0.0247655	-0.00133073	-0.0798401	-0.162224	0.0134368	-0.104465	0.0819848	0.0270795	0.0174108	-0.14993	0.0933598	0.01517	-0.0903933	-0.0395712	0.014755	0.114176	0.0794902	0.124887	-0.045263	-0.0078101	-0.0293581	-0.0124263	0.000565844	0.010416	0.0401025	-0.0705136	-0.0716618	0.079252	0.074874	-0.0767592	-0.0835348	0.0582063	-0.040989	0.0523977	-0.0416642	-0.133438	-0.0167053	-0.0416981	0.0337034	-0.0663349	-0.0213876	-0.0175001	0.00162603	-0.0370406
V255	0.020053	-0.00496549	0.068064	-0.0633552	-0.00701865	-0.0417938	-0.0431954	-0.0774318	-0.108272	-0.0353057	-0.0340299	0.10969	-0.0183933	-0.00679133	-0.155467	0.0790996	-0.0351306	-0.132795	-0.123602	0.00580179	0.0559473	0.0283607	0.0502821	-0.0191637	-0.0647584	-0.0256397	0.000888862	-0.00333542	-0.00909108	0.0554059	-0.0905877	-0.0701272	0.0296268	0.0632241	-0.0282633	-0.0424345	0.0646801	-0.00716354	0.0794301	0.00313801	-0.074876	-0.0191059	-0.0517717	0.0154799	-0.0488538	0.0105855	-0.0322353	-0.010997	-0.0619299
V256	0.0165288	-0.00101359	0.0762519	-0.0829867	-0.0319077	-0.0515992	-0.0175828	-0.0422869	-0.0405506	-0.0689367	0.0395631	0.1534	-0.0319694	-0.014675	-0.115839	0.0608017	-0.0670277	-0.139391	-0.151403	0.0453007	-0.0194958	-0.0146499	-0.00162546	0.0266165	-0.0798238	0.0263024	0.0235703	0.0115388	-0.0274181	0.0820266	-0.0510208	-0.0487079	-0.0437161	0.0175753	-0.00945367	0.0457878	0.0454052	-0.0127097	0.0667181	0.0231664	-0.0136733	-0.00824376	0.00118015	0.00159794	-0.036504	0.0239823	0.000353046	0.0264117	-0.0897362
V257	0.0157216	0.00400256	0.0806477	-0.0827117	-0.032679	-0.0291123	0.00178288	0.0134465	0.0310978	-0.0838737	0.108891	0.136105	-0.0474955	-0.043455	-0.057391	0.0634064	-0.0444292	-0.110675	-0.109351	0.0562881	-0.111852	-0.0551204	0.00512891	0.016401	-0.110438	0.0681449	0.0420403	0.00957044	-0.0314034	0.104721	-0.0307287	-0.0279161	-0.0615529	0.0191869	0.0104786	0.0429026	-0.0140623	-0.0122001	-4.11061e-06	0.000467939	0.021333	-0.00256773	-0.0232412	-0.0269245	0.00598111	-0.0104223	0.00627794	-0.0313138	-0.0442955
V258	0.0126432	0.013541	0.0711701	-0.0768186	-0.0328465	-0.0146816	0.0237876	0.0756714	0.0641206	-0.0735592	0.171509	0.116002	-0.0872466	-0.0454371	0.0259621	0.0310749	-0.0404445	-0.0741762	-0.0337185	0.0953542	-0.103855	-0.0368642	-0.0288853	0.00588195	-0.0752874	0.100152	0.0650082	0.00506477	-0.0247841	0.120924	-0.0377032	-0.0428387	-0.0663726	0.00925245	0.0331202	0.0453021	-0.0559324	-0.00102902	-0.0370509	0.0313301	0.0279003	0.00713307	-0.0535877	0.0166085	0.0523631	-0.00777094	0.0214277	-0.0368757	0.0337158
V259	0.0103545	0.0136737	0.0579085	-0.0574028	-0.02544	0.0102676	0.0512227	0.127713	0.0812588	-0.0101869	0.200787	0.0954264	-0.114131	-0.0656844	0.0650287	0.0258912	-0.0193038	-0.0333869	0.0402989	0.0621945	-0.13108	-0.00755164	-0.041821	0.0022278	-0.0201163	0.101754	0.10737	-0.0552846	-0.00936673	0.0815985	0.00572232	0.0307113	-0.0427324	0.0325423	0.00643424	0.0346736	-0.0886225	-0.022369	-0.0078723	-0.00579422	0.00457435	0.0333103	-0.0392716	0.0560584	0.05806	-0.0311044	0.0273496	2.63463e-05	0.0285983
V260	0.0133185	0.0169589	0.0375096	-0.0427081	-0.0252624	0.029998	0.0722634	0.134325	0.0767289	0.0388781	0.218791	0.0264123	-0.126564	-0.0475089	0.104741	0.026686	-0.0307324	-0.0257712	0.151019	0.039405	-0.0746141	0.0509879	-0.00486451	-0.0427187	0.0181964	0.0633868	0.0654368	-0.0382063	-0.0348796	0.0351591	0.0351556	0.0783966	-0.0209976	0.065251	-0.0185422	0.0178646	-0.0718905	-0.0155754	0.0193112	-0.0340172	-0.0341518	0.0357343	-0.0315736	0.054253	0.0525082	-0.00449665	0.0077945	0.0630956	0.0276418
V261	0.0224278	0.0162974	0.0208991	-0.0348432	-0.0161626	0.0506797	0.0537331	0.140038	0.0469783	0.0900203	0.171141	-0.0371191	-0.122376	0.000151972	0.0733735	0.0493812	-0.0149993	-0.00229931	0.208456	0.0063782	-0.00442413	0.106124	0.00330485	-0.0617824	0.0303126	0.00994943	0.0145871	-0.0249745	-0.0277751	-0.000317238	0.0505261	0.0720516	0.0438877	0.0683502	-0.0730956	0.0338257	-0.0220654	-0.0124881	0.0210041	-0.0372288	-0.0322382	0.0465127	-0.0441677	0.0449385	0.0232816	-0.001525	0.0202856	0.0556658	0.0288946
V262	0.0320711	0.0139673	0.018255	-0.0366033	0.0127226	0.0493056	0.0281715	0.111057	0.0138021	0.104375	0.138961	-0.0850141	-0.083189	0.0571547	0.0404261	0.039951	-0.00349827	-0.0160988	0.178041	-0.00940866	0.0307092	0.115832	0.0269567	-0.0547512	0.0111154	-0.00379736	-0.0014773	0.00271789	-0.00628869	-0.0377817	0.0749194	0.0325242	0.0617369	0.0535962	-0.101341	0.037903	0.0228452	0.0037167	0.0131287	-0.0446912	-0.042874	0.0511628	-0.0557679	0.0212094	-0.0194906	-0.0265226	0.039887	0.0239689	0.0248201
V263	0.0390404	0.00771653	0.0168647	-0.0411616	0.034323	0.0403286	-0.00591817	0.0966453	-0.0179924	0.0991311	0.103042	-0.0610473	-0.0450015	0.0638688	0.00205492	0.0338509	0.0146246	-0.0231753	0.114662	-0.0360076	0.0132102	0.0619071	0.0233341	-0.0309551	-0.0467945	0.00787634	-0.0021395	0.0230175	0.0197977	-0.0922422	0.132016	0.0131681	0.0495987	0.0103853	-0.108977	0.0355053	0.0441726	0.00548504	0.0613724	-0.055815	-0.0584532	0.0297624	-0.0355472	0.0321546	-0.0306759	0.019197	0.0224386	-0.045335	0.0389487
V264	0.0435451	0.00469992	0.020506	-0.0412242	0.0321341	0.0301937	-0.0189774	0.0898955	-0.0305163	0.0595124	0.0749009	-0.0230072	0.0217338	0.0285012	-0.0287799	0.0329533	0.0418789	-0.0524117	0.0353454	-0.068866	-0.000837488	0.0337133	0.0209064	-0.00400629	-0.028768	0.0064298	0.0143268	0.0174281	0.0419219	-0.110849	0.153946	0.000530485	-0.0121979	-0.0219853	-0.0967004	-0.0171297	0.0464111	-0.0144333	0.0599332	-0.0814102	-0.0823833	-0.00774245	0.0283949	0.0153706	-0.0300902	0.0552916	0.00586153	-0.0816445	0.0249253
V265	0.0439887	0.000431286	0.0223475	-0.0465547	0.0344154	0.0264668	-0.0214269	0.0702351	-0.0537001	0.0202196	0.0485202	0.00285916	0.0736818	0.000662933	-0.0607413	0.0132872	0.0484501	-0.0666063	0.000574393	-0.0873013	-0.0387552	-0.00210384	-0.00579335	0.00188435	-0.0133113	-0.00568067	0.0500672	0.0396802	0.0514323	-0.102364	0.173807	0.000905636	-0.0376055	-0.0205385	-0.0542525	-0.0200926	0.0337422	-0.0317336	0.0527358	-0.0354295	-0.0631329	-0.0103984	0.0550234	0.0239804	-0.00554087	0.0400809	-0.00878938	-0.0890053	0.00869595
V266	0.0433371	0.00109213	0.0190106	-0.0439791	0.0162868	0.0281826	-0.0245376	0.0737125	-0.0704269	-0.00531117	0.0412906	0.0260824	0.100937	-0.0111035	-0.0873829	-0.000208498	0.0582985	-0.0509186	-0.0247624	-0.0926523	-0.0445161	-0.0239785	-0.0247798	0.00122475	0.0101425	-0.000999924	0.0865838	0.0492892	0.0371258	-0.0752212	0.153459	0.0218319	-0.074265	-0.0316544	-0.0184481	-0.00922014	-0.00299981	-0.0598615	0.0347622	0.0215358	-0.0404161	-0.0251702	0.0334463	0.0304322	0.0129965	0.0490807	-0.0335068	-0.0719699	0.0213511
V267	0.0423552	0.000651415	0.0195148	-0.0442814	0.0139512	0.0359046	-0.0118218	0.0856546	-0.0852536	-0.0261317	0.0106929	0.0579291	0.100772	-0.00202044	-0.0991712	0.00620523	0.0638158	-0.0440791	-0.0369935	-0.0787135	-0.0620447	-0.0324669	-0.00102755	-0.00773795	0.026089	0.00394071	0.111061	0.0337159	0.0152054	-0.0519469	0.0892516	0.038603	-0.0887474	-0.0211674	0.0247516	0.015766	-0.0238997	-0.0733646	-0.00405505	0.0434384	-0.0115976	-0.0106935	0.0127605	0.0486016	-0.00455803	0.0461805	-0.0164436	-0.0497403	0.0139547
V268	0.0415025	0.00206662	0.0191299	-0.0408579	0.0143506	0.0446466	-0.00929528	0.107069	-0.0992134	-0.0379948	-0.00608385	0.0666887	0.0889616	-0.0147987	-0.10205	0.00943066	0.0680024	-0.0189174	-0.0224849	-0.0289389	-0.0734878	-0.0273682	0.0170728	-0.0141555	0.0294467	0.00233723	0.10859	0.010587	0.0019624	-0.0249909	0.0320959	0.044815	-0.0736535	-0.0115109	0.0312071	0.0636861	-0.033278	-0.0803604	-0.0103756	0.050904	-0.000483025	-0.00819032	0.00862032	0.0539896	-0.00861123	0.0431534	-0.0133806	-0.0211153	0.00835454
V269	0.0411487	0.0014229	0.0112193	-0.0368065	0.016034	0.0580892	0.00320908	0.124162	-0.0814697	-0.0405346	-0.0433655	0.0848766	0.0604593	-0.0258147	-0.0965542	-0.00854504	0.0667594	-0.000314818	-0.00300095	-0.00163644	-0.0563993	-0.0419066	0.0344915	-0.0284408	0.0272328	-0.0120104	0.0967548	0.01821	0.00351667	-0.00542782	-0.0180839	0.0264403	-0.0230708	0.00567632	0.033001	0.118677	-0.00209099	-0.0943127	-0.0292113	0.0499329	-0.00931277	-0.0155187	-0.0157674	0.0716629	-0.00622187	0.0142018	0.0049727	-0.0164526	0.00289881
V270	0.0405234	0.00479753	0.000951675	-0.0283463	0.0272532	0.068279	0.0260827	0.136806	-0.0720213	-0.0238108	-0.0586126	0.0748362	0.0315273	-0.039343	-0.0693869	-0.023149	0.0693069	0.0363558	0.000184375	0.0119196	-0.0183822	-0.0382859	0.0502541	-0.0203952	0.013032	-0.00694393	0.0643902	0.0407892	7.03806e-05	-0.0161837	-0.0544537	0.017229	0.0373251	0.0380248	0.0288995	0.148137	0.0222934	-0.056608	-0.0413263	0.0110498	-0.0655419	-0.0192031	-0.02368	0.0942185	0.0057184	-0.0082226	0.0159477	-0.0181869	-0.00647382
V271	0.0413725	0.00620935	-0.00916527	-0.0218957	0.0388246	0.072029	0.0466848	0.123266	-0.0274538	0.0212699	-0.062463	0.0556446	0.0131865	-0.0472484	-0.025926	-0.032571	0.0745023	0.074878	-0.023477	0.00607286	0.0165978	-0.0293623	0.0268851	-0.00539158	-0.0180906	-0.0177866	-0.0013078	0.0546154	0.0167794	-0.00409688	-0.0842721	-0.00459961	0.0684344	0.0843855	0.0272755	0.140557	0.0313971	-0.0452513	-0.0370483	0.00141003	-0.0722684	-0.00685871	0.0091754	0.0945684	-0.00980198	-0.0580193	0.0301917	-0.0553658	-0.00476489
V272	0.0413434	0.00816468	-0.0121966	-0.0231581	0.0532019	0.0647888	0.0529551	0.102778	0.00780945	0.0523367	-0.0528475	0.0321026	-0.00848122	-0.076675	-0.00109814	-0.0134801	0.063424	0.0828511	-0.0419975	0.0127345	0.0296675	-0.0120572	-0.00612238	0.0128144	-0.0496362	-0.0247239	-0.0640153	0.046724	0.0146324	0.0167558	-0.0951884	-0.0286996	0.0597091	0.0953755	0.0481737	0.142059	0.0126327	-0.0507854	-0.0292265	0.013076	-0.0683666	0.0138626	0.016028	0.0680705	0.00596577	-0.062011	0.0502311	-0.0580123	-0.0287926
V273	0.0412337	0.00932284	-0.0130857	-0.021294	0.0573703	0.0571205	0.0537668	0.0939402	0.0359762	0.0825658	-0.0387145	-0.00236868	0.00624104	-0.0994511	0.0205417	0.0109899	0.0308731	0.0475965	-0.065712	0.00236184	0.019504	-0.0189216	-0.0484884	0.0224441	-0.0905362	-0.0185325	-0.072094	0.00985216	0.00987526	0.00427753	-0.10537	-0.0669754	0.0501989	0.0829524	0.046552	0.118757	0.00167615	-0.0334616	0.00483371	0.0140269	-0.0558832	0.0514702	-0.0109729	0.0575785	-0.0407985	-0.0499289	0.0286846	-0.0842017	-0.0126699
V274	0.0423324	0.00801831	-0.00227164	-0.0222791	0.0599897	0.0462715	0.0374283	0.0867479	0.0486418	0.0993331	-0.024803	-0.00501695	0.0193847	-0.117064	0.0247294	0.0330281	0.00358744	0.0228939	-0.0639438	-0.00546318	0.00193051	-0.0172239	-0.0732942	0.0200973	-0.0882494	-0.0148336	-0.0704488	-0.008347	0.0167031	-0.00496916	-0.0781802	-0.0750253	0.0314486	0.0414349	0.0568523	0.0733986	-0.0027745	-0.0080361	0.031059	0.00572146	-0.0352916	0.0646798	-0.0268218	0.0383368	-0.0768282	-0.0165126	0.00769789	-0.108475	-0.0103529
V275	0.0430285	0.00799549	0.00729694	-0.0227627	0.059332	0.0341284	0.0124808	0.085793	0.0272454	0.0960153	0.00251231	0.00041049	0.0123707	-0.136217	0.015825	0.0665586	-0.0325534	-0.0179608	-0.0748106	-0.0133791	-0.00111119	-0.00986313	-0.0816937	0.0169303	-0.0628016	-0.027722	-0.0251884	-0.0411901	0.0234376	-0.00132257	-0.0793818	-0.0664365	0.0034516	-0.00675247	0.0565882	0.00110171	-0.0368487	-0.0161206	0.026308	0.0151484	0.00121132	0.0417555	-0.0489948	-0.016167	-0.0830054	0.0106899	-0.0198446	-0.0840931	0.0147198
V276	0.0428301	0.00411372	0.0119947	-0.0257162	0.0463317	0.0305239	-0.00173745	0.0952551	0.0121863	0.0800943	0.018735	0.00316063	-0.00144265	-0.131933	0.00179738	0.0686924	-0.0673298	-0.0514345	-0.0718535	-0.0143815	0.0117196	0.0212551	-0.0763501	0.0522243	-0.0186833	-0.048914	0.0095998	-0.0736766	0.0217211	-0.00456623	-0.0681096	-0.0431588	-0.0446172	-0.0596322	0.0528693	-0.0286511	-0.0692291	-0.0246172	0.0447537	0.0342154	0.0222712	0.0283935	-0.0503724	-0.0389804	-0.071396	0.0252711	-0.0276155	-0.019779	0.0347404
V277	0.0442978	-0.00321099	0.0103627	-0.0324208	0.0355237	0.0260694	-0.00613241	0.0944229	-0.00616707	0.0593858	0.0112482	0.00904113	-0.0268806	-0.11868	-0.0288707	0.0684819	-0.0817917	-0.0599379	-0.0317644	0.0229011	0.0295722	0.0631142	-0.0490934	0.0258887	-0.0103355	-0.0550449	0.00505301	-0.083778	0.00592921	0.000829246	-0.0712659	0.00488878	-0.0563268	-0.0520748	0.0420908	-0.0648263	-0.0582005	-0.0323446	0.032502	-0.00370563	0.053761	-0.0100822	-0.0397566	-0.060884	-0.0278898	0.0292689	0.00239581	0.0220888	0.0262677
V278	0.0456398	-0.00574594	0.00443822	-0.0362235	0.0271289	0.0182266	-0.0169211	0.103667	-0.0125551	0.0330614	0.0116118	-0.00235194	-0.0464151	-0.0665703	-0.0421861	0.0640885	-0.0983273	-0.0589112	-0.00500849	0.0653578	0.0476354	0.0658561	-0.0212711	0.0290244	-0.0160467	-0.0456762	0.000728526	-0.0712646	-0.0039542	0.0137703	-0.0940234	0.00123664	-0.0301261	-0.0392711	0.0090165	-0.0629316	-0.0184732	-0.0180794	0.00470924	-0.00425881	0.0605491	-0.0362148	-0.0706203	-0.0607725	-0.00375448	0.0160411	0.0364309	0.055156	0.0134003
V279	0.0481688	-0.00905514	-0.00312623	-0.0299326	0.0279082	0.0129407	-0.0186931	0.102146	-0.0119712	0.00836721	0.0176999	-0.00939833	-0.0679482	-0.0422082	-0.0461527	0.0455857	-0.0689533	-0.0342095	-0.0147013	0.0918122	0.0399809	0.03556	-0.0157811	0.0113855	-0.030681	-0.0122857	-0.0159181	-0.0522301	-0.00713391	-0.00949719	-0.0833085	0.00711472	-0.0157986	-0.0204986	-0.0297599	-0.0304004	0.00889712	0.00950026	-0.0204096	-0.00598509	0.0511973	-0.0486615	-0.0426619	-0.036866	0.000214092	-0.0120166	0.0242895	0.0598316	0.00129501
V280	0.0497258	-0.0108759	-0.0066074	-0.0185924	0.0370221	0.0124628	-0.0177817	0.0941818	-0.0109192	-0.0205069	0.00968016	-0.00615066	-0.0559205	-0.019344	-0.0246008	0.0251371	-0.0603007	-0.0212958	-0.0267718	0.0868989	0.0408355	0.0137198	-0.00918798	0.00245324	-0.0316582	0.0308583	-0.0200235	-0.0353139	0.000403502	-0.043301	-0.0495727	-0.00636377	0.00352075	-0.0130844	-0.0505588	-0.0111577	-0.00581105	0.0382219	0.0119639	-0.00550482	0.00330999	-0.0582749	0.0132713	-0.0225402	0.0130063	-0.0511601	0.0144202	0.0504598	0.0227929
V281	0.0507734	-0.00933284	-0.0122076	-0.00623359	0.037101	0.0132252	-0.0187832	0.0851645	-0.00852079	-0.0190892	-0.00720669	-0.00902377	-0.0400227	-0.00844229	0.00694641	0.00655741	-0.0243194	-0.01115	-0.0299464	0.0713156	0.0376616	-0.0235979	-0.0064898	0.000149568	-0.0342362	0.0407617	-0.0372778	-0.0381879	-0.0018213	-0.0429235	-0.0312908	0.0132242	0.0243146	0.00313143	-0.0742299	0.0202712	0.00441096	0.070803	0.00353129	-0.00558508	-0.0221568	-0.0653954	0.0267194	-0.000953703	0.0225211	-0.0394079	0.0180271	0.0366425	0.0318846
V282	0.0519826	-0.00471326	-0.0155242	-0.000977153	0.0221403	0.0178514	-0.00363936	0.0647458	-0.00792803	-0.00957732	-0.0150093	-0.01236	-0.0082953	0.00509409	0.02863	-0.00602905	-0.0124231	-0.0115324	-0.0304469	0.0671671	0.0281648	-0.044599	-0.00676529	-0.00904949	-0.0133525	0.0245509	-0.0440798	-0.0356806	-0.0363936	-0.0206322	-0.0220273	0.0250143	0.0320714	0.0087913	-0.0442081	0.0612096	-0.00961842	0.0738926	0.0101783	0.00699331	-0.0225707	-0.0655342	0.0423428	-0.0122303	0.0110622	-0.0203356	0.00448902	0.0363331	0.0471312
V283	0.0521347	-0.00190364	-0.0191041	0.00325122	0.0130314	0.0183031	0.00393015	0.0460127	-0.0211351	0.0056958	-0.0091136	-0.0182184	0.00823132	0.0362242	0.0279068	-0.0173526	0.00307426	-0.0147688	-0.0365367	0.0527951	0.00287789	-0.0523582	-0.0162887	-0.0245023	-0.0132219	0.0127109	-0.0269652	-0.0319933	-0.0496664	-0.00265468	-0.0219344	0.0326086	0.0379206	0.0143556	-0.0220364	0.091343	-0.0268162	0.095158	0.0205328	0.0323142	-0.0108508	-0.0359739	0.0209355	0.00456048	-0.0294963	0.000625959	-0.0167751	0.0320283	0.0194164
V284	0.0519477	-0.000789671	-0.01743	0.00158777	0.000680864	0.0170891	0.00348007	0.026357	-0.0311299	0.0146166	-0.0165333	-0.018551	0.00896135	0.0539544	0.0110285	-0.0105653	0.00398205	-0.0230562	-0.0375303	0.0316171	-0.0277715	-0.0490045	-0.0332418	-0.046574	-0.0164798	-0.00663385	0.000458822	-0.0383775	-0.064165	0.00588778	-0.0427381	0.0348517	0.0261244	0.0128599	0.0100614	0.0862121	-0.0541838	0.0978716	0.0280539	0.0201519	0.0123817	-0.0195272	0.00224197	-0.0181495	-0.0605746	0.0423317	-0.00241566	0.0164168	-0.00833672
V285	0.0510199	-0.000952153	-0.0145628	-0.00479784	0.0032784	0.0218064	0.00886897	0.00607221	-0.043924	0.0257909	-0.0214416	-0.000599952	0.00950997	0.0620165	0.00603675	-0.0129453	-0.00300818	-0.0288457	-0.0139381	0.016987	-0.0637777	-0.034339	-0.0290504	-0.0604721	-0.0130515	-0.030826	0.0190825	-0.0503579	-0.0797006	-0.000403548	-0.0419799	0.0402896	0.0224593	0.0210319	0.0396143	0.0742651	-0.0733002	0.104686	0.0360524	0.00363573	0.0350249	-0.013002	-0.0128719	-0.0451715	-0.0626738	0.0490549	0.00317151	-0.0196138	-0.0395211
V286	0.0510621	-0.000180454	-0.0109496	-0.00584613	0.00647819	0.0291567	0.00329231	0.00496817	-0.0501019	0.0367549	-0.0259014	-0.000104275	0.00999295	0.054402	-0.0168588	-0.0155816	-0.00970292	-0.0213794	-0.00200881	0.00111503	-0.0694088	-0.0307792	-0.0225324	-0.0474344	-0.0081626	-0.033097	0.0253333	-0.0382974	-0.0751311	-0.00821692	-0.0223091	0.0608731	0.0136021	0.0270113	0.0445047	0.0650943	-0.0642284	0.0808209	0.0326713	-0.0182042	0.0224057	-0.0277706	-0.0206994	-0.0636676	-0.0356648	0.0581391	0.0157953	-0.0365103	-0.0458608
V287	0.0513783	0.000870031	-0.0113092	-0.00447902	0.010781	0.0255986	0.00876437	0.00598779	-0.0439384	0.0389197	-0.0370203	0.0121493	0.00782202	0.055807	-0.0256204	-0.0152103	-0.00167674	-0.0039873	0.00176746	-0.00891638	-0.0677166	-0.0214338	-0.0108486	-0.0370972	-0.00406405	-0.0214986	0.0418563	-0.0369335	-0.0526011	-0.0197824	-0.00743525	0.0916465	0.003608	0.0183882	0.0304041	0.0260744	-0.0547086	0.0506596	0.0130026	-0.0626806	0.00876042	-0.0500178	-0.0175865	-0.0458379	0.0107971	0.0140945	0.0377109	-0.0620124	-0.0366629
V288	0.0515214	0.00117556	-0.0127739	-0.00473236	0.0193091	0.0253766	0.0184402	0.0103248	-0.0352148	0.0342731	-0.0360794	0.030615	-0.0004109	0.045592	-0.0331903	-0.0121068	-0.00654587	0.0187053	-0.00976948	-0.0121156	-0.0542144	0.00517909	-0.00721814	-0.019103	-0.0142676	-0.0249067	0.0284315	-0.0351892	-0.0447758	-0.0171347	0.00807668	0.0932394	-0.00767227	0.00762136	0.0175619	-0.0154397	-0.0592296	0.0565917	0.0219495	-0.0700698	0.000970741	-0.0793193	-0.0103736	-0.015114	0.042327	-0.0315051	0.0648424	-0.0565586	-0.0141602
V289	0.0521822	0.000154978	-0.0147419	-0.0050096	0.0307306	0.0172941	0.0130452	0.0120706	-0.0149629	0.0220756	-0.0222728	0.0516231	-0.00241879	0.0159017	-0.0260815	-0.0284031	0.0115025	0.0386445	-0.0134252	0.00328848	-0.0371426	0.00469173	-0.0158081	-0.0218936	-0.0262453	-0.0238309	0.0251069	-0.0209357	-0.0372752	-0.00326782	0.000465779	0.0662134	-0.0186788	-0.0125401	0.0121802	-0.0384183	-0.0561642	0.0437476	0.00318612	-0.0410731	-0.0149527	-0.0872845	-0.000777431	0.0228722	0.0518479	-0.0663497	0.0745889	-0.0641506	-0.0176066
V290	0.0523709	-7.45822e-06	-0.0174259	-0.0013115	0.0337434	0.00952934	0.00262732	0.00975612	-0.0120372	0.00903535	-0.0119493	0.054006	-0.00894148	-0.0040773	-0.0183181	-0.0398973	0.0115164	0.0441677	-0.0159532	0.0213391	-0.0141001	0.0132929	-0.0101179	-0.0142979	-0.041647	-0.00914299	0.0265859	-0.00780295	-0.043314	0.00823167	-0.00315246	0.0479815	-0.0111814	-0.064282	-0.0128262	-0.0374134	-0.0261091	0.0660926	-0.00955237	-0.0150914	-0.023259	-0.0692032	-0.0101743	0.0496792	0.0488103	-0.0634068	0.0640639	-0.0505837	0.00566218
V291	0.0528289	0.0010225	-0.0160341	0.00297896	0.0331227	0.0107005	-0.00648727	0.0122769	-0.00672072	-0.00475306	0.00535293	0.0336195	-0.0102937	0.00497012	0.00097597	-0.0362658	-0.00305538	0.0381372	-0.0216617	0.0275903	0.0169739	0.0104743	-0.00268006	-0.0163748	-0.0451686	-0.00121672	0.0280991	-0.00167937	-0.0369215	0.0227799	-0.0226213	0.0139728	0.00640389	-0.0787338	-0.0174397	-0.0444658	-0.0295784	0.096361	-0.0111922	-0.00207342	-0.00712307	-0.0581926	-0.0082168	0.0724905	0.0137731	-0.0400811	0.0463905	-0.0302319	-0.00357387
V292	0.0529388	0.00169431	-0.017707	0.00365898	0.0314746	0.0131893	-0.00576111	0.00260382	-0.016797	-0.0137047	0.0169828	0.0202546	-0.00874881	0.00802635	0.00162642	-0.0337621	0.000730081	0.016227	-0.00681571	0.0302739	0.0350845	0.0123103	-0.00145694	-0.0197206	-0.0241494	-0.0267095	0.0320366	0.00800993	-0.038221	0.0526968	-0.0356755	-0.00130369	0.00378561	-0.100011	-0.00795674	-0.027028	-0.0283767	0.0835277	-0.0129238	0.0180607	-0.00780642	-0.0480708	-0.0106982	0.0578796	-0.00952564	-0.0150621	0.0189084	8.59129e-05	-0.0108522
V293	0.0524011	-7.16972e-05	-0.0263981	0.00440295	0.0241019	0.0134987	-0.00533079	-0.00602811	-0.0316804	-0.0215217	0.0282802	0.00149652	-0.0108501	0.0108427	-0.00426232	-0.0249599	0.0132765	-0.019703	-0.00408105	0.0264543	0.0596532	0.0162679	-0.00359427	-0.0209214	-0.0115758	-0.0429281	0.0157098	0.00552938	-0.0280028	0.0672701	-0.063449	-0.0138153	0.00892888	-0.0852113	-0.0126619	-0.0170151	-0.0403981	0.0629439	-0.00879664	0.0235752	-0.018258	-0.0320947	0.000438872	0.0354367	-0.0265841	0.00210772	0.0123795	0.0346706	-0.0102147
V294	0.0517048	-0.0035667	-0.0353948	0.00555048	0.0181671	0.0195649	-0.00267325	-0.0108647	-0.0369256	-0.0262381	0.0241014	-0.00928968	-0.030975	0.0204257	-0.0145784	-0.0105231	0.019777	-0.0367557	0.00150285	0.0261241	0.0490666	0.0148848	-0.0079722	-0.0219057	-0.0119046	-0.0508616	-0.00229258	-0.00398848	-0.0141178	0.0469504	-0.0651588	-0.0142348	0.0169867	-0.0720636	-0.00885062	-0.0112807	-0.0408919	0.0613859	0.00420127	0.0305528	-0.0137144	-0.0249204	-0.00402384	0.0310454	-0.0180512	0.027927	0.0247035	0.0394845	-0.0201409
V295	0.0513024	-0.00518089	-0.0418182	0.00610607	0.0132321	0.022022	0.000635473	-0.0155079	-0.0376797	-0.0268064	0.0245322	-0.00881676	-0.0448215	0.0184595	-0.0221035	0.00877269	0.0190769	-0.0389229	0.00510475	0.0205179	0.0351196	0.00963632	-0.00556093	-0.0265005	-0.0214335	-0.0457049	-0.00992817	-0.00153428	-0.0061923	0.0360359	-0.0587241	-0.00803879	0.0242555	-0.0498937	0.000592482	-0.0142998	-0.0318639	0.0450964	0.00983759	0.0247743	-0.00924037	-0.0306874	-0.0109241	0.0211497	-0.0241261	0.0439647	0.00820989	0.029208	-0.04049
V296	0.0517331	-0.00650027	-0.0409676	0.0081576	0.0110077	0.0309514	0.00590254	-0.0192953	-0.0281314	-0.0295092	0.0241684	-0.0214591	-0.0493687	0.0107439	-0.0176244	0.0320672	0.0166102	-0.030098	-0.0109524	0.00837135	0.0148292	-0.000498773	-0.00223491	-0.00261911	-0.0335135	-0.0288027	-0.0248009	-0.00239601	0.00343801	0.019118	-0.0430755	-0.000248436	0.016101	-0.0437649	0.00411344	-0.0120351	-0.0333817	0.0278813	0.0305845	0.0354824	-0.0122702	-0.0174874	-0.0195363	0.0168979	-0.0192482	0.0205684	0.011449	0.025357	-0.0336743
V297	0.0522067	-0.00649827	-0.039411	0.0101598	0.010691	0.0375688	0.00470681	-0.0149206	-0.0113942	-0.0219969	0.0110253	-0.0176082	-0.0492553	0.000743444	-0.0200506	0.0412618	0.0103252	-0.0202542	-0.00815215	0.00373358	0.0110743	0.00327558	0.00660123	0.00274266	-0.032851	0.0028197	-0.0418053	-0.00497672	0.0226784	-0.00242665	-0.0244502	0.0161131	0.0128282	-0.0224784	-0.00201211	-0.0236613	-0.0256105	0.0122131	0.0392133	0.0267106	-0.0141021	-0.00733963	-0.0148813	0.0135388	0.00919395	0.000787113	0.0145522	0.0156581	-0.0116672
V298	0.0523957	-0.00569099	-0.0343581	0.0104802	0.00836183	0.0419895	0.00431095	-0.0037237	0.00728263	-0.0131703	-0.00359791	-0.00856229	-0.0408189	0.00106638	-0.016616	0.0382093	-0.00122963	-0.0153978	-0.00886055	-0.00555737	0.00427324	-0.00115662	0.0194365	0.0238721	-0.0419109	0.0268017	-0.0400025	-0.0296962	0.0273765	-0.0112667	-0.00746035	0.0273147	0.0135778	-0.0241872	-0.00490011	-0.020397	-0.00820877	-0.000871548	0.0340521	0.0190798	-0.0191437	-0.00130497	-0.0167947	0.0138003	0.0449261	-0.0030813	0.0217381	0.0229749	0.0154194
V299	0.0526364	-0.00517802	-0.0321091	0.00902537	0.0034721	0.0397101	0.00163193	0.00173971	0.0204773	-0.0104362	-0.0107446	-0.00644485	-0.0306887	-0.00161965	-0.0145418	0.0240863	-0.00163334	-0.0136883	0.00224246	0.00314783	0.00371979	0.00572659	0.0308568	0.0425013	-0.0409106	0.0329124	-0.040365	-0.0249989	0.0196789	-0.00376022	-0.000324067	0.0400382	0.00365312	-0.0235819	-4.1796e-05	-0.00114066	0.0207501	-0.00282502	0.00816197	0.0115369	-0.00234781	-0.00670094	-0.0232548	0.0330962	0.0582463	-0.0106208	0.000885236	0.0343675	0.0175952
V300	0.0530594	-0.00486894	-0.0291858	0.000144651	-0.000139016	0.0372061	0.00175999	-0.00223725	0.0240804	-0.0149552	-0.00720988	-0.00606088	-0.022217	-0.00750891	-0.00589487	0.00818626	-0.0147105	-0.00490221	-0.000155035	0.0051149	0.00260714	0.0235999	0.0241346	0.0423383	-0.0279576	0.0397006	-0.0253854	-0.00653359	0.0198382	0.008677	-0.00210263	0.0363033	0.00440917	-0.0185984	0.00835524	0.00166891	0.0180035	-0.00655261	0.00576514	0.0132733	0.0132879	0.00894001	-0.0132772	0.0414775	0.0579032	5.41094e-05	-0.0163176	0.034723	0.0344873
V301	0.053369	-0.00531333	-0.0304109	-0.00584581	-0.00423841	0.0298424	0.00225367	-0.00576111	0.0175238	-0.0234941	0.000498587	-0.0119769	-0.0165529	-0.0119418	-0.00469144	-0.0112297	-0.0150409	-0.00380632	0.0067408	0.0176456	0.0082676	0.0332745	0.0149637	0.0296182	-0.0295228	0.0403777	-0.0141119	0.0152183	0.0104048	0.0203501	-0.000696677	0.0287202	0.013473	-0.0112452	0.0120531	-0.00332916	0.0153489	0.00311991	-6.04162e-05	0.015806	0.0234946	0.0222477	-0.0104748	0.0465996	0.0523104	0.0159189	-0.0110568	0.0168689	0.020087
V302	0.053583	-0.0048071	-0.0292501	-0.00918232	-0.00903045	0.0299041	0.00176981	-0.00932745	0.00923598	-0.0268652	-0.00450138	-0.0101606	-0.00917191	-0.0116141	-0.00119636	-0.014604	-0.0269729	-0.0120632	0.0151064	0.0302	0.0131453	0.0353635	0.00665528	0.0171645	-0.014673	0.0309363	-0.0109643	0.0370537	-0.0110922	0.0231235	-0.0145185	0.0266571	0.00740067	-0.00664314	0.0323413	0.00195207	0.0113885	0.00653718	-0.00382068	0.00716935	0.0242756	0.0154369	-0.00111713	0.032124	0.0306058	0.0346896	-0.0192529	-0.00822635	0.0106766
V303	0.053796	-0.00372961	-0.0317897	-0.00488475	-0.00822963	0.0291455	0.00414174	-0.0061584	-0.00302178	-0.0204042	-0.00145867	-0.00316118	0.00241422	-0.0034315	0.00365769	-0.0188366	-0.0233224	-0.00950868	0.0120091	0.0338599	0.0219059	0.0284875	0.00871198	0.0183016	0.00169241	0.0220134	-0.00543488	0.0483739	-0.0252399	0.0116362	-0.0137416	0.0262736	-0.00219142	0.0167752	0.0325826	0.000334838	0.00558693	0.0103156	-0.00357893	0.0113589	0.0141066	0.000442625	-0.00299778	0.0324025	0.00457002	0.0341345	-0.0220854	-0.0285874	0.0169362
V304	0.0539237	-0.00272799	-0.0336126	0.000303089	-0.00894074	0.0228378	0.00368554	-0.00322555	-0.00899694	-0.0159446	-0.000995341	-0.00652521	0.00459045	-0.00227054	0.00305236	-0.00854605	-0.0273271	-0.0108629	0.00780883	0.0327932	0.0229992	0.0160171	0.00487776	0.0104081	0.00632272	0.0228426	-0.00529642	0.0566864	-0.0194054	0.00018517	-0.0240469	0.0334846	-0.0134588	0.0287176	0.0234293	-0.00106826	0.0116651	-0.00206067	-0.00667955	0.0105566	0.00167684	-0.0162227	-0.00415818	0.02826	-0.0180005	0.0223981	-0.0222362	-0.0340753	0.0199316
V305	0.0536339	-0.00239851	-0.0381038	0.00403801	-0.00825742	0.0210017	0.0111958	0.000661782	-0.0154984	-0.00774913	-0.00342891	0.00722488	0.00057788	-0.00749773	0.00832426	0.00213929	-0.0163303	-0.0073656	0.000195318	0.0317499	0.0253359	0.00453662	0.00751208	0.00690456	-0.000571363	0.0206816	-0.00386611	0.0518033	-0.0235393	-0.000692338	-0.0216421	0.0273868	-0.0221286	0.01492	0.0173149	-0.0188916	0.0167671	-0.00595885	-0.00137586	0.00562405	-0.00115943	-0.031061	-0.000280437	0.0224134	-0.0180823	0.0116436	-0.0253758	-0.0305084	0.03021
V306	0.0532119	-0.00292417	-0.0395911	0.00872946	-0.00345174	0.021546	0.00975164	0.00291904	-0.0117903	0.0021874	-0.000503309	0.0134049	-0.00157299	-0.0146307	0.0195275	0.0163229	-0.00826942	-0.00741357	-0.00738901	0.0246994	0.0204504	0.00323634	0.0133155	0.0117176	-0.0116567	0.0138329	-0.0101958	0.0497692	-0.0266108	-0.00726694	-0.0214227	0.00628647	-0.0251141	0.00720616	0.00813313	-0.0301761	0.0143277	-0.00863513	0.00393609	0.0306924	-0.00590326	-0.0449467	0.00680332	0.00765006	-0.0168057	0.0036483	-0.0103181	-0.0287462	0.0431767
V307	0.0532502	-0.00230739	-0.0384905	0.0143238	-0.00597029	0.0164516	0.00746118	0.00461436	-0.00994425	0.00975997	0.00339167	0.0157691	0.000615934	-0.0124023	0.0239519	0.0358246	-0.0072884	-0.00517328	-0.00424228	0.0265146	0.0142561	0.000662593	0.0181435	0.011092	-0.0187135	0.0194095	-0.00382968	0.0298648	-0.0212928	-0.01407	-0.0231211	0.00447998	-0.0208193	-0.00541642	-0.000399912	-0.0418805	0.00246427	-0.00970661	0.00186671	0.0203311	0.00416597	-0.0307273	0.0175257	0.0105474	0.00419535	-0.0012557	-0.00210819	-0.0287736	0.0429605
V308	0.0531756	-0.00401407	-0.036743	0.015932	-0.00422163	0.0167767	0.0129097	0.00201147	-0.00394315	0.0170602	0.0033524	0.0143148	0.00391945	-0.00208814	0.020355	0.0446378	-0.0134725	-0.00100773	-0.000738523	0.0224693	0.0074682	0.00284045	0.0177419	0.0134435	-0.0340101	0.0200556	-0.011568	-0.000188294	-0.023642	-0.0135159	-0.0176379	-0.00910208	-0.0148603	-0.00981492	-0.00863889	-0.045087	-0.000817027	-0.000422447	0.00578587	0.00958603	0.026409	-0.0199432	0.0198378	0.011387	0.0224948	-0.00835301	0.0136572	-0.0206173	0.043566
V309	0.0532197	-0.00514574	-0.0358554	0.0154539	-0.0033881	0.0188614	0.0179859	0.00292284	0.00240057	0.011688	0.00586594	0.00305318	0.0170983	0.0132796	0.0203342	0.0455326	-0.0138906	-0.00365135	0.0095052	0.0211844	0.00179293	0.00278475	0.0191986	0.013503	-0.0256406	0.0109762	-0.00647971	-0.0220666	-0.0185855	-0.0168538	-0.0236311	-0.0233786	-0.00252859	-0.0119175	-0.0113114	-0.0409214	-0.0130169	-0.00387898	0.00877165	-0.00234288	0.0420866	-0.001974	0.0248136	0.0108875	0.0334585	-0.00147891	0.0132883	-0.0195952	0.0282426
V310	0.0529348	-0.00732514	-0.0357459	0.0134624	-0.00180162	0.0223873	0.0233805	-0.00238053	0.00499892	0.0035166	-0.00675882	-0.00960695	0.020155	0.0323497	0.00653925	0.0340331	-0.0160673	-0.0130916	0.0246798	0.0110836	-0.00700602	0.010343	0.0218151	0.0131202	-0.00776263	0.00513204	0.00193272	-0.0476072	-0.0132766	-0.0193143	-0.017256	-0.0300295	0.0139044	-0.0276704	-0.0182406	-0.0201261	-0.00966583	0.00332915	0.0162525	-0.00385965	0.0522688	0.0224883	0.0318953	0.000791557	0.0365122	-0.00792863	0.00575713	-0.00868733	0.0338044
V311	0.0525005	-0.00968565	-0.0366397	0.00939255	-0.00404029	0.0224244	0.0284185	-0.00667014	0.00871052	-0.00925174	-0.00752952	-0.0218342	0.0198571	0.0403579	0.0026056	0.0181212	-0.0100876	-0.00628027	0.0381129	0.0054461	-0.0150402	0.0110855	0.015495	-6.91878e-05	-0.00475476	-0.000468258	-0.00867789	-0.0534618	-0.0112094	-0.0234737	-0.0159738	-0.0376543	0.0380875	-0.0198648	-0.0157717	-0.00843156	-0.0144196	0.0132085	0.0118148	0.0040561	0.0540354	0.0312971	0.0305231	-0.00447118	0.0339637	0.00478344	-0.00813975	0.00284084	0.00579745
V312	0.0519474	-0.00868755	-0.0369973	0.00300767	-0.00702724	0.0321638	0.0323322	-0.0102312	0.00488821	-0.0129889	-0.00964697	-0.0151815	0.0168909	0.0446696	-0.0085214	0.00123862	-0.00956956	0.00283584	0.0488666	-0.00551568	-0.030826	0.0123242	0.0182941	-0.00832513	-0.00438162	-0.00967357	-0.00809048	-0.0398893	-0.0184159	-0.0344505	-0.0013874	-0.0418565	0.0559487	-0.0228778	0.00132798	0.0230965	-0.00376184	0.0167446	0.00158622	0.0168309	0.0555521	0.0352124	0.00753052	-0.00953011	0.020702	0.0220094	-0.0265375	0.014398	-0.0352204
V313	0.0517409	-0.00861517	-0.0376324	-0.000461376	-0.00785197	0.0344742	0.0284186	-0.0137175	0.00477929	-0.00848834	-0.00423204	-0.010974	0.0125163	0.0419242	-0.0107331	-0.0108123	-0.00568224	0.00395416	0.0495263	-0.022737	-0.025845	0.0158804	0.0185188	-0.0172887	-0.00307857	-0.00428761	-0.0205445	-0.0143143	-0.0281817	-0.026327	0.0014368	-0.0404313	0.0608308	-0.00544065	0.0041871	0.0349161	-0.000339024	-0.000247332	0.000664173	0.0193304	0.0491766	0.0310349	-0.0121387	-0.0271102	0.00260929	0.0231209	-0.0246737	0.0353617	-0.0678965
V314	0.051891	-0.00777762	-0.0340767	-0.00203793	-0.00821226	0.0356444	0.0234532	-0.00918554	0.0060449	0.001637	0.00209976	-0.00737313	-0.000871802	0.0472343	-0.00968071	-0.0142168	-0.021836	-0.00183132	0.0167595	-0.0403907	-0.0188005	0.0217708	0.0329177	-0.0143905	-0.00799512	0.0146107	-0.0229127	0.00343922	-0.0162234	-0.0239773	0.00639148	-0.0179595	0.0596301	-0.0010513	0.0109664	0.0468836	0.0147314	-0.00071998	-0.00384628	0.0248448	0.0368207	0.0279614	-0.0335091	-0.0316336	-0.0105699	0.0242526	-0.0169539	0.0415923	-0.0777841
V315	0.0518259	-0.00780415	-0.0338781	-0.00293057	-0.00661941	0.0311037	0.014982	-0.000862589	0.0159136	0.0133092	0.00497515	0.0179644	-0.00880497	0.0445064	-0.00925933	-0.0194624	-0.0290599	-0.000104343	-0.00579576	-0.0480912	-0.00815971	0.0388613	0.0438269	-0.00677237	0.000477922	0.0312632	-0.0199416	0.0112515	-0.00832734	-0.0122486	0.0122868	-0.00772147	0.0625418	0.00903433	0.0121515	0.056339	0.0243164	-0.00694268	-0.00265057	0.0224718	0.00794485	0.00834086	-0.0434375	-0.0309181	-0.0114577	0.0268697	-0.0180826	0.0450839	-0.0679797
V316	0.051623	-0.00804375	-0.0317368	-0.0055277	-0.000202951	0.0270978	0.00979202	0.00411792	0.0155487	0.0289768	0.00274363	0.0358017	-0.0170108	0.0447119	-0.000879668	-0.00610314	-0.0237654	-0.0052115	-0.0245803	-0.0496318	-0.010909	0.0287911	0.0407387	0.0284777	0.00385209	0.0317425	-0.0100597	0.0254036	0.00279892	0.00407614	0.0135087	0.0020845	0.0460571	0.00995885	0.00519643	0.0659568	0.0396309	-0.00867757	-0.0101043	0.035329	-0.0285767	-0.00523815	-0.0376226	-0.0249772	-0.016686	0.0210537	-0.0117724	0.04444	-0.0572376
V317	0.0518388	-0.00656555	-0.030167	-0.0108465	0.0105312	0.0197565	0.00457252	0.00547276	0.0112816	0.0475398	0.00909468	0.0415801	-0.0210134	0.0381698	0.0109738	0.019207	-0.0268263	-0.0109791	-0.0354917	-0.0250069	0.00238886	0.0159248	0.0307325	0.0207728	0.0304671	0.0370596	0.00393121	0.033108	0.0188443	0.0212082	-5.16679e-05	0.0314011	0.0562587	0.0105533	-0.0118585	0.0371719	0.0312502	-0.0195442	0.0031948	0.0179823	-0.032625	-7.00108e-05	-0.047777	0.00125368	-0.00736961	0.0161837	-0.00881412	0.0323817	-0.0477364
V318	0.0517734	-0.00637383	-0.0251635	-0.013258	0.0148971	0.00795051	0.00816689	0.000682741	0.0130753	0.0500957	0.0172718	0.0457711	-0.0289648	0.0321152	0.0274435	0.0394323	-0.00759662	-0.0145049	-0.0429151	0.0143954	-0.00516197	-0.0126739	0.00917555	0.00849957	0.0492631	0.0376823	0.0213102	0.0138596	0.0245572	0.0311951	-0.0195716	0.0550919	0.0785683	-0.00388495	-0.0104332	-0.00501194	0.019216	-0.0203861	0.0144588	0.00399109	-0.0608158	0.018468	-0.0204802	0.0237039	0.0136943	0.0269746	0.00903158	-0.0154898	-0.0309036
V319	0.0511077	-0.00591019	-0.023028	-0.0114381	0.0202078	0.00641982	0.013144	0.00215723	0.00726921	0.0327505	0.0126926	0.039986	-0.0245082	0.0463359	0.0367105	0.0460437	0.0110006	-0.0125539	-0.0309416	0.0622835	-0.0167745	-0.0335113	0.000446019	0.0154348	0.0730207	0.0274549	0.0408496	-0.0264408	0.0176009	0.0173052	-0.0335013	0.043894	0.0772824	-0.0138874	-0.0026957	-0.028873	0.0239884	-0.0149938	0.013329	-0.0213098	-0.0728668	0.019694	-0.0053106	0.0493382	-0.0076597	0.000202888	0.0192539	-0.0560552	-0.0309884
V320	0.050256	-0.00963861	-0.0236169	-0.0123481	0.0249128	0.0168032	0.0122237	-0.00418592	0.0171904	0.0192267	0.0132485	0.030781	-0.01413	0.0541484	0.0436193	0.0440017	0.0143004	-0.0171846	-0.0194633	0.0786728	-0.0364815	-0.0520092	-0.0118141	0.0235507	0.0832729	0.0198191	0.0474924	-0.0516703	0.00781158	0.00137165	-0.0404572	0.0327532	0.0643717	0.00936224	-0.0133847	-0.0404269	0.0334471	-0.000485911	-0.00122396	-0.0382877	-0.0432261	0.0121764	0.000808642	0.0516398	-0.0365083	-0.0243154	0.0128553	-0.0709956	0.00368796
V321	0.0502467	-0.00968718	-0.0248213	-0.0173289	0.0247054	0.0220894	0.0153144	-0.0146004	0.0253077	0.000936524	0.0268255	0.0166894	-0.00752959	0.0547176	0.0272188	0.0263727	0.0135642	-0.00560009	0.00199105	0.0756001	-0.0487941	-0.0636632	-0.0223092	0.0281486	0.0717693	0.011369	0.0528392	-0.0765983	-0.00998019	-0.0174004	-0.0186633	0.0110479	0.0489713	0.039892	-0.0114968	-0.0408182	0.0456708	-0.00421927	0.00506547	-0.0195048	-0.00669772	0.013451	-0.0138538	0.0313357	-0.0362166	-0.0451833	-0.00600238	-0.0669553	0.0426108
V322	0.050564	-0.00990726	-0.0263133	-0.019484	0.0267115	0.0306319	0.0140107	-0.0214813	0.0333566	-0.0068436	0.0322649	0.0112176	-0.00794524	0.0508853	0.0116973	0.0275195	0.00495154	-0.00790231	0.0253086	0.0565827	-0.0611815	-0.0525639	-0.0202598	0.0346307	0.0456497	0.0061023	0.0360759	-0.0627673	-0.00568706	-0.022659	-0.0296115	0.00580144	0.0285363	0.0409106	-0.00851057	-0.0235019	0.0617559	-0.0239701	-0.000448043	-0.0207848	0.031227	0.0336999	-0.0222886	0.000381611	-0.0357761	-0.0505573	-0.0282377	-0.0428689	0.0368821
V323	0.0511464	-0.00906207	-0.0312747	-0.0172009	0.024514	0.0318213	0.0102072	-0.0190401	0.0344836	0.00891188	0.0405154	0.0142969	-0.00651406	0.050807	0.00617985	0.020249	0.0111399	0.00859601	0.0273037	0.0283879	-0.0419492	-0.0390236	-0.0247018	0.0394814	0.0181885	-0.011905	0.0261058	-0.0299957	-0.00896636	-0.0350173	-0.0216295	-0.00702898	0.0105283	0.0611563	-0.0167299	-0.017107	0.0456578	-0.0258282	0.0120745	0.00727112	0.0383873	0.0381684	-0.011529	-0.0223021	-0.0240547	-0.0256911	-0.0178846	-0.0192475	0.0568847
V324	0.0511832	-0.0101263	-0.0355496	-0.0135631	0.0234292	0.0244292	0.00844389	-0.0211351	0.0329137	0.0197771	0.0457842	0.0209145	-0.00219987	0.0476358	-0.00376414	0.018252	0.00575328	0.00808454	0.00849066	0.0099649	-0.0301668	-0.0303753	-0.0212088	0.0432631	0.00602968	-0.00891404	0.0217953	-0.0106622	0.00775079	-0.037418	-0.0344448	-0.00784179	-0.0135683	0.0761657	-0.0206725	-0.00315272	0.0300196	-0.0228257	0.0149586	0.0301902	0.0404597	0.030934	-0.0196082	-0.0253843	-0.0218026	-0.00889802	0.0110172	-0.0109608	0.0597732
V325	0.0511703	-0.0113592	-0.0381787	-0.0123168	0.0275336	0.0171807	0.0139987	-0.020516	0.0270386	0.0178437	0.0467431	0.040605	0.00444901	0.0393046	-0.00981949	0.015785	0.00772225	0.0131236	-0.0119865	-0.00552912	-0.00110944	-0.0294036	-0.0140877	0.0425527	-0.00129853	-0.00592231	0.0246083	-0.00530584	0.012409	-0.0150736	-0.0344098	0.00718622	-0.0194766	0.0614147	-0.0173658	-0.0016804	0.0352228	-0.0204573	0.0141388	0.020637	0.0245251	0.0295998	-0.0159692	-0.0125337	-0.0193138	0.0111578	0.0334855	-0.00181307	0.060269
V326	0.0507152	-0.0132316	-0.041367	-0.00806269	0.0314076	0.00720619	0.0126124	-0.0108416	0.0265457	0.00926914	0.0508332	0.0413472	0.00850242	0.0285835	-0.00994406	0.00743812	0.0221762	0.0110435	-0.032654	-0.00448523	0.01458	-0.0153167	-0.0151767	0.041099	0.0172573	-0.0250713	0.0224523	0.00359576	0.0204124	0.00713882	-0.0332249	0.0160627	-0.0339432	0.0542673	-0.0318714	-0.0184756	0.0397997	-0.0390742	0.0110176	0.0239476	-0.0149882	-0.0109177	-0.00244319	-0.0164595	-0.0197954	0.0305091	0.039304	-0.015425	0.0851334
V327	0.0510951	-0.0131776	-0.0404264	-0.007658	0.0270095	-0.00752191	0.008616	-0.00295178	0.0268472	-0.00418847	0.043712	0.0398688	0.0158287	0.00775428	-0.00785111	0.00649851	0.0291617	-0.00172077	-0.0343507	0.00497427	0.0239433	-0.00199553	-0.0100627	0.0300591	0.0386951	-0.0393041	0.0208621	-0.000345502	0.0357251	0.0183461	-0.0330712	0.026397	-0.0276952	0.0384422	-0.0289256	-0.0311251	0.0295521	-0.0481363	0.00966685	0.0103428	-0.0538626	-0.0326279	0.0247004	-0.00697217	-0.0241144	0.0452353	0.0165466	-0.0143112	0.0777687
V328	0.0515178	-0.0134713	-0.036872	-0.0083595	0.0256402	-0.0180732	0.00317336	-0.00618239	0.0218736	-0.00235893	0.0328124	0.039691	0.0207332	-0.00618113	-0.00296716	0.00129967	0.0415704	-0.0020882	-0.0186496	0.0212026	0.0242444	-0.00248264	-0.012733	0.018921	0.0534511	-0.0335445	0.0193706	-0.0075217	0.0412308	0.0168698	-0.0206618	0.0244729	-0.0287297	0.0283651	-0.0256511	-0.0311918	0.0324188	-0.0356027	0.00195562	-0.00318667	-0.0756051	-0.0349212	0.038063	0.00174113	-0.0226085	0.0254475	0.00347405	-0.0313172	0.0536476
V329	0.0520524	-0.0122377	-0.0361753	-0.0083893	0.0212494	-0.0212919	0.00105912	-0.00910653	0.0119193	-0.00500589	0.028672	0.0392846	0.0198476	-0.0153201	0.00885414	-0.0105713	0.0489643	0.0032027	-0.00447392	0.0288702	0.0114801	-0.014358	-0.0196175	0.00479132	0.0517439	-0.0296522	0.0132313	-0.00499474	0.0324062	0.0193261	-0.0151941	0.0226648	-0.0179629	0.0227809	-0.031481	-0.0253949	0.0125607	-0.0331569	-0.00945992	-0.028068	-0.0719155	-0.0304687	0.0316988	0.00700171	-0.0168398	0.0162683	-0.0144853	-0.0252258	0.0122916
V330	0.0530902	-0.0118457	-0.0346836	-0.00911344	0.0174449	-0.0154444	-0.00457458	-0.0136157	0.00570268	-0.00555056	0.0215351	0.0286582	0.00788956	-0.00635336	0.0115313	-0.018756	0.0364759	-0.00561426	-0.00573715	0.016555	-0.00122898	-0.0184134	-0.0111254	-0.000461268	0.0379375	-0.000442217	0.010911	-0.00841642	0.0223655	0.017337	-0.00178563	0.0171506	-0.0114862	0.00809223	-0.0277934	-0.0112945	0.00498089	-0.0159916	-0.0132479	-0.0592798	-0.0432273	-0.0182295	0.0218176	0.00801277	-0.0125633	-0.00806621	-0.0217522	-0.0214649	-0.00831605
V331	0.0536376	-0.0109056	-0.0311716	-0.00911091	0.0152628	-0.0148632	-0.0050724	-0.0209355	0.00789239	0.000341056	0.020502	0.0084499	-0.000446756	0.00423321	0.0153655	-0.0208647	0.0198321	-0.00711635	-0.010942	0.0120888	-0.0146268	-0.011805	-0.00280502	0.000630374	0.0152309	0.0161871	-0.00436033	-0.0140581	0.0233111	0.0126541	0.005525	0.0107033	-0.00766954	0.00947196	-0.032474	-0.00424541	0.00365981	-0.00909288	-0.00254631	-0.0644558	-0.0185139	-0.0141969	0.0122471	0.00467748	-0.0217078	-0.0280782	-0.0279652	-0.0225811	-0.0227577
V332	0.054148	-0.00957592	-0.0281677	-0.0136272	0.0114942	-0.0055547	-0.00428033	-0.0190214	0.00574843	0.00636875	0.0202879	0.0065375	0.000893697	0.0177787	0.00787303	-0.00923403	-0.000186588	-0.00782924	-0.0173793	0.00372012	-0.0246621	-0.00427106	0.0119568	0.00835711	-0.0050822	0.0271497	-0.000540676	-0.0143851	0.028177	-0.000265172	0.00521429	-0.00620157	-0.00808388	0.0063145	-0.0233715	0.0118683	0.00670042	0.00100874	0.000261527	-0.0627552	0.00869873	0.00649176	0.000727396	-0.00575508	-0.0197474	-0.0345588	-0.0223862	-0.0205626	-0.0249661
V333	0.0541322	-0.00914397	-0.0265354	-0.0168734	0.0122473	0.000779412	-0.00108605	-0.0163843	0.00428209	0.0142622	0.0165789	0.00636481	0.00606775	0.02865	-0.00533286	0.00218924	-0.0187743	-0.0153454	-0.00668	-0.00297856	-0.0247625	-0.0114215	0.0126664	0.0146281	-0.0189057	0.0330148	-0.00649912	-0.014179	0.0308894	-0.0103045	-0.00298355	-0.0164207	-0.01022	0.00476715	-0.0270226	0.0139653	0.00352195	-0.0029009	0.00629787	-0.0483246	0.02728	0.0284619	-0.00757686	-0.0150044	-0.0257946	-0.0288108	-0.0267133	-0.0122337	-0.0238193
V334	0.0537388	-0.0069621	-0.0252976	-0.0210234	0.0157642	0.00665046	0.00271422	-0.0135638	-0.00284321	0.0187181	0.0217127	0.00322051	0.0078623	0.0373164	-0.013068	0.0164335	-0.028761	-0.0275726	-0.000987509	-0.0139724	-0.0319302	-0.0192207	0.0162679	0.00952057	-0.0306528	0.0402767	-0.00439355	-0.00766574	0.0344253	-0.020734	-0.0104214	-0.00611237	-0.00751038	-0.00623552	-0.0215362	0.00903204	0.014787	-0.00899344	0.0179621	-0.0291259	0.0337302	0.0409644	-0.00622759	0.0029226	-0.040491	-0.0121133	-0.041089	-0.017929	-0.025925
V335	0.0536393	-0.00627497	-0.0272509	-0.0227885	0.0144017	0.00570011	0.00175684	-0.013814	-0.0073889	0.0140376	0.02809	0.00434946	0.0144529	0.0356682	-0.013527	0.0196191	-0.0333359	-0.0173304	0.00206113	-0.0237045	-0.0322955	-0.00659412	0.0132343	0.00732288	-0.0338473	0.0402489	0.00215107	-0.00203997	0.0284719	-0.0223711	-0.0166733	0.0028451	0.00959512	-0.0118551	-0.010434	-0.00760127	0.0174197	-0.0214998	0.0249461	-0.0106325	0.0240088	0.0386206	-0.00839161	0.0273396	-0.0322961	0.00318131	-0.0383567	-0.0182993	-0.0165249
V336	0.0532799	-0.00816424	-0.0320354	-0.0232196	0.0115169	0.00721137	0.00145376	-0.011316	-0.0123516	0.0044811	0.0339361	0.00293192	0.0153552	0.0238511	-0.0173141	0.00634138	-0.0169379	-0.0144874	0.0118228	-0.0396311	-0.0378883	0.0101553	0.00935516	0.0266311	-0.0320052	0.0248961	-0.00705141	0.000593614	0.0152768	-0.00582205	-0.0109781	-0.0050214	0.0157089	-0.0189719	0.00207791	-0.0153449	0.0251946	-0.0248702	0.0128952	0.0038118	-0.000635747	0.0237715	0.00964049	0.0476023	-0.0479481	0.00979702	-0.034331	-0.0225222	-0.0177477
V337	0.0529968	-0.00970182	-0.0353255	-0.0224676	0.00969133	0.00777764	-0.000260663	-0.00741788	-0.0122823	0.00785566	0.0317176	0.00516303	0.00605695	0.00909758	-0.0115372	-0.00435965	-0.0102774	-0.0145009	0.0202971	-0.0459384	-0.032498	0.0307307	0.00142542	0.0291028	-0.0323434	0.000770142	-0.0196116	-0.00099491	0.00125741	0.00713191	0.00140598	-0.0142723	0.0143314	-0.0214939	-0.00979334	-0.0188283	0.0338873	-0.0314572	-0.0101007	0.00908294	-0.0117307	-0.00234347	0.00599675	0.0517121	-0.0592653	0.0167933	-0.0273135	-0.0168149	-0.0179532
V338	0.0523759	-0.0109185	-0.0371852	-0.0201098	0.0047197	0.00864473	-0.00334275	-0.00704663	-0.0118352	0.00897185	0.0344078	0.0142482	-0.00246394	-0.00370881	-0.00531997	-0.0186201	-0.00445794	-0.00676543	0.033731	-0.0587564	-0.0306665	0.0488816	-0.0100551	0.0235532	-0.027789	-0.0180356	-0.0226868	0.00618086	-0.00387447	0.0145025	0.0135447	-0.0161476	0.0147909	-0.0163465	-0.012196	-0.0328962	0.0496624	-0.0162961	-0.0272758	0.00765099	-0.0171145	-0.0155597	0.0127898	0.04785	-0.0470755	0.017224	-0.0278864	-0.0222508	-0.0230251
V339	0.0521528	-0.0111792	-0.036154	-0.0190735	0.000735229	0.00997297	-0.00648862	-0.0113635	-0.0131865	0.0117038	0.0255143	0.0221469	-0.0119551	-0.000360604	-0.00403533	-0.030954	-0.00267932	0.00402429	0.042438	-0.0629152	-0.0295504	0.0626225	-0.0173716	0.0226512	-0.0148413	-0.0231261	-0.0273526	0.0109591	-0.00226994	0.0128393	0.0165635	-0.0187613	0.000104953	-0.0135481	-0.00402648	-0.0189192	0.0539994	-0.0130045	-0.0383005	0.0035716	-0.00596375	-0.00727579	-0.00237448	0.0488053	-0.0440691	0.00463565	-0.0171175	-0.031033	-0.0318487
V340	0.0517814	-0.0113013	-0.036245	-0.0139677	0.000339379	0.0124476	-0.0105414	-0.0183848	-0.0142834	0.0176417	0.00686939	0.0239152	-0.0238866	0.011808	0.000275087	-0.044439	0.000601282	0.0058442	0.0471738	-0.0573776	-0.0246839	0.070351	-0.0209476	0.0111331	-0.0225381	-0.0162254	-0.0370307	0.0202021	-0.000898137	0.00958104	0.0106233	-0.0124585	-0.00854612	-0.00833479	-0.0214644	-0.00350561	0.0559068	0.00401777	-0.0454801	0.0138328	0.0236307	-0.00964149	-0.00205098	0.043618	-0.0338452	-0.00201563	0.00261929	-0.0339564	-0.0446129
V341	0.0517039	-0.011589	-0.0342454	-0.0150975	-0.00300178	0.0195218	-0.00670757	-0.0262069	-0.0153293	0.0140622	-0.0134294	0.0210467	-0.0251319	0.0190175	-0.0067553	-0.0529267	0.00696713	0.00538563	0.0371444	-0.0540319	-0.0150719	0.0701734	-0.0251901	-0.00479477	-0.0291371	-0.00770269	-0.0337372	0.0167257	-0.0120304	0.0122478	0.007826	-0.0038911	-0.011771	-0.00828771	-0.0271951	0.0032504	0.063629	0.0226554	-0.0298034	0.0298084	0.0411251	-0.0102612	-0.00179762	0.0359363	-0.0227883	-0.0072195	0.0204295	-0.0273826	-0.0428934
V342	0.0520169	-0.0105061	-0.031923	-0.0139668	-0.00242162	0.0310131	-0.00804114	-0.0274425	-0.0158917	0.00168697	-0.0249679	0.0256666	-0.0210544	0.0236854	-0.0113039	-0.043476	0.00489894	0.00118794	0.0236826	-0.0467438	-0.0113643	0.0642066	-0.0171455	-0.017805	-0.0299529	-0.0142638	-0.0300894	0.0113626	-0.0163409	0.00709955	-0.00802511	0.0048087	-0.0213745	-0.00538265	-0.0205843	-0.00683657	0.0642753	0.0133103	-0.0215231	0.0263768	0.0590579	-0.0212179	-0.020887	0.0122671	-0.00710923	-0.0109345	0.0447408	-0.015697	-0.0248164
V343	0.0522395	-0.00688453	-0.0305362	-0.0110167	-0.00443626	0.039155	-0.0136773	-0.024351	-0.0132317	-0.00417997	-0.0276902	0.0218519	-0.0122039	0.0247417	-0.0171773	-0.0307365	0.00501414	0.00436765	0.0138307	-0.0396347	-0.00859337	0.0618417	-0.0118416	-0.033559	-0.0207226	-0.0222632	-0.0250385	0.017814	-0.0149069	-0.0129973	-0.00772811	0.0145744	-0.0171625	-0.00334597	-0.0100519	-0.0253897	0.0658309	-0.00387655	-0.0134352	0.0278604	0.0564416	-0.0296049	-0.0213677	0.00264901	0.00559902	0.0072475	0.0344216	-0.00285505	-0.0032966
V344	0.0528688	-0.00509914	-0.0307275	-0.0117863	-0.00485769	0.0374178	-0.0159625	-0.0213162	-0.0146078	-0.0136379	-0.0221396	0.011306	0.00699782	0.00846493	-0.0173254	-0.0159779	0.0108668	0.00696676	-0.000931344	-0.018216	-0.0117331	0.0518216	-0.012762	-0.0209064	-0.0135035	-0.0274137	-0.0265399	0.0165275	-0.0126663	-0.0202724	-0.00147742	0.0224108	-0.0150039	0.0104671	0.00232291	-0.0380693	0.0466396	-0.0176867	0.00524861	0.0227004	0.0473247	-0.0318023	-0.0126603	-0.00822913	0.000619595	0.0156648	0.0183321	0.0187646	0.0164145
V345	0.0531639	-0.00453046	-0.0318579	-0.0142094	-0.00116776	0.0368093	-0.0163901	-0.0216135	-0.0136658	-0.0179614	-0.0217942	0.00265227	0.0218832	-0.00476672	-0.017029	0.00142147	0.014446	0.0179251	9.01351e-05	-0.00520825	-0.00871568	0.0349792	-0.0154245	-0.012766	-0.00699459	-0.0208515	-0.0215548	0.0133747	-0.0196507	-0.031138	0.00384894	0.028776	0.00378301	0.00748403	0.0157638	-0.0346915	0.0267441	-0.0145539	0.0309604	0.0260453	0.0245517	-0.0126313	-0.00524598	-0.0137412	0.00798121	0.0293202	0.00343025	0.0357331	0.0126869
V346	0.0533037	-0.00493893	-0.034211	-0.0121858	0.00521604	0.0308833	-0.0187349	-0.0246242	-0.00947068	-0.0202843	-0.00946514	-0.0044937	0.0200774	-0.0120077	-0.0128348	0.0112743	0.0176937	0.02564	-0.00699708	-0.0029753	-0.00942376	0.0155248	-0.0338512	-0.00567369	0.0100314	-0.0218817	-0.0157688	0.0150447	-0.016198	-0.02466	0.0121412	0.036662	0.0152867	0.0125842	0.00827342	-0.0253922	0.00867742	-0.0169156	0.045444	0.0224248	0.00655351	-0.00653993	0.00228048	-0.0208216	0.00749981	0.0241225	-0.00562492	0.0390808	0.0341537
V347	0.0532452	-0.00571307	-0.0373682	-0.00972101	0.00943804	0.0193343	-0.0220962	-0.0274571	0.000439666	-0.0223818	0.00278007	-0.0108112	0.00760564	-0.0295461	-0.00532516	0.00420692	0.0174494	0.0279878	-0.0112433	-0.00868441	-0.013186	-0.00357617	-0.0355146	-0.00422029	0.00110248	-0.0238864	-0.023093	0.0131006	-0.013336	-0.0189538	0.0169666	0.0372517	0.0153986	0.0186071	0.00596878	-0.0169391	-0.00225387	-0.0163347	0.0362576	0.0157081	-0.00894379	-0.00406453	0.00145328	-0.0319681	-0.00196781	0.0217221	-0.00855906	0.0459662	0.0381107
V348	0.053156	-0.00567788	-0.0385943	-0.00741617	0.0139772	0.0117719	-0.0294138	-0.0281828	0.0062195	-0.0188493	0.0100446	-0.00630541	-0.00170151	-0.036566	-0.00106249	0.00470365	0.0161502	0.0212743	-0.010699	-0.00869125	-0.0151215	-0.00378413	-0.0295805	-0.00238639	0.00118996	-0.0130203	-0.0290395	0.00683944	0.00246503	-0.0199293	0.0253657	0.0324621	0.0094189	0.0229903	0.00939642	-0.0104009	0.0118593	-0.0102615	0.0254337	-1.72972e-05	-0.0190606	0.00521842	-0.000978973	-0.0373378	-0.000143143	0.0201991	0.00364754	0.0304374	0.0255605
V349	0.0534452	-0.00513642	-0.0381525	-0.00106724	0.0210186	0.00108073	-0.0272548	-0.0276673	0.00767207	-0.0130935	0.0167707	0.000764923	-0.0047402	-0.0338871	0.00422099	0.00476068	0.00448225	0.0158493	-1.27034e-05	-0.00247161	-0.0136541	-0.0119314	-0.0154282	0.00281065	0.00554702	-0.00780153	-0.0166986	0.000231565	0.015763	-0.0159948	0.0279516	0.0248674	-0.000420989	0.0119389	0.00404201	-0.00466722	0.0182301	-0.00369674	0.018463	-2.61968e-06	-0.0218888	0.0196015	0.00237937	-0.0368707	-0.00258036	0.00739503	0.0198318	0.0236857	0.0192964
V350	0.0535456	-0.00412109	-0.0371838	0.000501283	0.0217225	-0.00258323	-0.0286506	-0.0246933	0.00284979	-0.00725682	0.0188572	0.00365662	-0.00458451	-0.028354	0.0078716	0.00364323	-0.0119444	0.00155863	-8.7328e-05	-0.000804127	-0.0106217	-0.0140158	-0.00625865	0.00179542	0.011614	0.0134793	-0.00871782	0.00453625	0.0263492	-0.0135122	0.0183533	0.0229488	-0.0140075	0.000790349	-0.00339025	0.00604041	0.0256164	0.0125216	0.00307188	-0.00403072	-0.0214967	0.0456938	-0.000414746	-0.0236845	-0.00605794	-0.000763531	0.0379544	0.0112096	0.00432565
V351	0.0535687	-0.00363559	-0.0340408	0.00694391	0.0243974	-0.00397844	-0.0276869	-0.0233269	0.00539007	-0.00224881	0.0119402	-0.000411776	-0.00289707	-0.0228841	0.00609481	-0.00468904	-0.0225768	-0.00482856	0.00688351	0.00206013	-0.0187111	-0.0203441	0.00373845	-0.00733546	0.0149959	0.0386882	-0.00974102	0.00673095	0.0355103	-0.0158836	0.00966896	0.0255574	-0.019096	-0.000834757	-0.017343	0.00894989	0.0225368	0.0209547	0.00494102	0.00817498	-0.0158341	0.0473656	0.00800113	0.00212715	-0.010777	-0.00980897	0.0468175	0.00355454	-0.00767622
V352	0.0537229	-0.00351829	-0.0312755	0.0106796	0.0223687	-0.00410666	-0.0257416	-0.0167321	-0.00327012	-0.00126298	0.00726201	-0.0027262	-0.00283972	-0.01645	0.000435222	-0.00577883	-0.029847	-0.00756709	0.0088049	-0.00283871	-0.0192977	-0.0181703	0.0135756	-0.0215497	0.0121755	0.0465718	-0.00705905	0.00860093	0.0308917	-0.0257215	0.00259637	0.0217759	-0.0268503	-0.0045054	-0.0210228	0.0179438	0.0125843	0.0222925	0.00169392	0.00663125	0.000707593	0.0414931	0.00946795	0.0165665	-0.00952522	-0.0226208	0.0537531	0.00716677	-0.0167204
V353	0.0538307	-0.00540416	-0.0280645	0.0152414	0.0168583	-0.00393091	-0.0269469	-0.0103005	-0.00851682	-0.00295444	0.000501213	-0.00756574	0.00087173	-0.0108342	-0.00361555	-0.00884911	-0.0346148	-0.00774878	0.00557069	-0.0090905	-0.014571	-0.016318	0.0229384	-0.0215507	0.00585562	0.0452002	-0.00455095	0.00795993	0.0235624	-0.0310739	-0.00281813	0.0180936	-0.03548	-0.0055343	-0.019545	0.0211788	-0.00718916	0.0256049	-0.0155305	0.00380793	0.0153948	0.0262221	0.0115337	0.0191538	-0.020845	-0.0364798	0.0453204	0.0271119	-0.0222634
V354	0.0539394	-0.00657739	-0.0261985	0.0175308	0.0149718	-0.00155129	-0.0222964	-0.000704583	-0.0151651	-0.000761193	0.00241209	-0.0138777	-0.000409708	-0.00926289	-0.00492715	-0.00839245	-0.0237207	-0.0127396	0.00484445	-0.00866467	-0.017362	-0.00641702	0.0230066	-0.0275726	-0.00017013	0.0385619	-0.0142485	0.0132113	0.014127	-0.02523	-0.00621655	0.0177744	-0.0426068	-0.00613653	-0.00928814	0.00792656	-0.0317988	0.0183266	-0.0115817	-0.00393675	0.0199022	0.0176811	0.00766698	0.010568	-0.0370647	-0.0272063	0.026852	0.0487392	-0.0303146
V355	0.0540631	-0.00794341	-0.0236808	0.0191619	0.00797297	-0.00443816	-0.0216306	0.00897181	-0.0162618	0.00194028	0.00156945	-0.0118944	-0.0010575	-0.00210511	-0.000761186	0.00207059	-0.0186272	-0.00302568	-0.00516775	-0.0137096	-0.0216525	-0.00245258	0.0191401	-0.0258505	-0.00429076	0.0372823	-0.00561704	0.0172033	0.014582	-0.0311739	-0.00427689	0.0259206	-0.0427536	-0.000101869	-0.00223037	-0.00357774	-0.0440327	0.0217557	-0.0186037	-0.0106187	0.0245651	0.0187942	-0.00551512	0.00330471	-0.0263747	-0.0142832	0.0143173	0.0622714	-0.0233645
V356	0.0538844	-0.00973257	-0.0228995	0.0176877	0.00766915	-0.00213984	-0.0237389	0.012894	-0.0215387	0.00490406	0.012998	-0.0118401	0.00456501	0.00667225	-3.25266e-05	0.0112752	-0.0146802	0.00261704	-0.0113425	-0.0123676	-0.0295849	-0.0056937	0.00362357	-0.01793	-4.82338e-05	0.0384769	0.00568823	0.0162423	0.0091883	-0.0282581	0.00184329	0.0280272	-0.032064	-0.00129181	0.00693984	-0.0158135	-0.0515627	0.0361654	-0.0167791	-0.0236072	0.0337447	0.0296735	-0.0195508	0.0057228	-0.0178558	-0.005251	-0.00267183	0.070172	-0.02476
V357	0.0541124	-0.0087505	-0.0195106	0.0151288	0.0139054	-0.00892384	-0.0230783	0.0145102	-0.020848	0.0178108	0.0118902	-0.012053	-0.00582295	0.0219454	-0.0077468	0.0241577	-0.0100976	-0.0100189	-0.0085307	-0.0100756	-0.0315779	0.000414759	0.00289951	-0.00821	-0.0100793	0.0261229	-0.000504413	0.0207935	0.00414145	-0.020992	-0.00677844	0.0276393	-0.0202198	0.00456186	0.00164062	-0.00698003	-0.0640243	0.0340194	-0.00708707	-0.00349697	0.0280223	0.0242326	-0.0365406	0.00291403	-0.0133325	0.00294759	-0.016739	0.0579389	-0.0193283
V358	0.0539571	-0.0064273	-0.0178974	0.012633	0.0215382	-0.0172258	-0.0219945	0.0146607	-0.0179044	0.0254958	0.0227688	-0.00241861	-0.0121339	0.0185799	0.000181671	0.0253175	5.37875e-05	-0.0186155	-0.00561068	-0.00161811	-0.0260033	-0.0011794	-0.00557541	-0.0045521	-0.0147325	0.00447631	0.00942896	0.00752724	-0.0137302	-0.00882455	-0.0146622	0.0220562	0.00546375	0.0162387	-0.0249234	-0.0206072	-0.0594322	0.0313212	0.00801169	0.00740834	0.00544518	0.0398449	-0.0370379	-0.00849311	0.0232114	-0.00263538	-0.0189623	0.0446194	-0.00348224
V359	0.0533188	-0.00383965	-0.0129712	0.00340946	0.0283312	-0.017396	-0.0223591	0.0180848	-0.0153085	0.03682	0.0341497	0.0094546	-0.0129234	0.0153903	-0.0127623	0.0288556	-0.00609586	-0.0220578	-0.0150354	0.00276552	-0.0166326	0.00897218	0.013736	0.0028346	-0.00408731	-0.0178862	0.019423	-0.00337104	-0.0332843	-0.00852214	-0.00961028	0.0159199	-0.00470475	0.0222489	-0.0243544	-0.0287213	-0.0390836	0.0146431	0.0150682	0.0176249	-0.0236265	0.0363117	-0.059068	0.00144071	0.0513678	0.0110838	-0.0280832	0.0232904	-0.0060621
V360	0.0529073	-0.000281992	-0.0115263	0.00220009	0.0338636	-0.0128923	-0.0305488	0.00723747	-0.0264731	0.0433857	0.0241816	0.03133	-0.0239922	0.0215036	-0.0209325	0.0184741	-0.0143517	-0.0252745	-0.0103628	0.00719359	-0.0222168	0.0102954	0.0354192	0.00884472	0.0125151	-0.0190157	0.00753217	-0.0164031	-0.0378008	-0.02209	0.00612995	0.00492671	-0.0143438	0.0297709	-0.0370417	-0.020754	-0.0134184	-0.0100129	-0.00774665	0.0322755	-0.0422988	0.0300459	-0.0529582	-0.000283459	0.049821	0.00416852	-0.0419812	0.00828543	-0.000345038
V361	0.0523761	-0.00105518	-0.00725809	-0.00485679	0.0425474	-0.0138904	-0.030617	-0.0157266	-0.0345258	0.0351806	0.0153592	0.0280659	-0.00979617	-0.00245481	-0.0184634	0.000249024	-0.000504927	-0.0292861	-0.00364715	0.00982939	-0.0143935	0.00321941	0.0502975	0.0151841	0.0288651	-0.0160102	0.00423471	-0.0272462	-0.0533521	-0.0328809	0.031026	-0.0104576	-0.0169168	0.0302211	-0.0520985	0.0116867	-0.0067772	-0.00143504	-0.0179909	0.062505	-0.0667449	0.043758	-0.0156718	0.00783875	0.0455068	-0.0305813	-0.061758	0.0107472	0.0217204
V362	0.0519621	-0.00520846	-0.00611838	-0.00460271	0.0457767	-0.00745217	-0.0357442	-0.0194978	-0.0441707	0.0198934	0.00559694	0.0126793	-0.0031653	-0.0225648	-0.0157353	-0.0191046	0.00714097	-0.022053	-0.000100019	0.00542917	-0.0232005	-0.00802022	0.0407467	0.00661055	0.041264	-0.0186608	-4.46701e-05	-0.0246274	-0.0533804	-0.026512	0.0344518	-0.00736047	-0.0139103	0.0293743	-0.0550699	0.0324403	-0.0139466	0.00723158	-0.0129774	0.0912343	-0.0811081	0.0318	0.0024615	-0.00513234	0.0270777	-0.059337	-0.0663095	0.00296447	0.019037
V363	0.0518457	-0.00975356	-0.00687196	-0.00133064	0.0349461	0.010507	-0.0418415	-0.0215135	-0.0384085	0.00308871	0.000959201	-0.00811282	0.00317567	-0.0297953	-0.0118039	-0.0318629	0.00144497	-0.0141222	0.0146673	-0.0112881	-0.0267079	-0.0273162	0.0200297	-0.0191319	0.039518	-0.0101286	-0.00984042	-0.0218393	-0.0368274	-0.0140761	0.0242645	0.00822724	0.00774949	0.0197782	-0.0609332	0.0319349	-0.00181147	0.0181987	-0.0295792	0.112158	-0.0790854	0.0275803	0.0124471	0.00695746	0.0311963	-0.0797944	-0.0726678	-0.0100045	0.00384308
V364	0.0517461	-0.0132088	-0.010551	0.00314915	0.0293673	0.0214475	-0.0351586	-0.0232555	-0.0297745	-0.0206137	0.00740931	-0.0304699	0.0138811	-0.0341182	-0.0086822	-0.0456144	-0.00640932	-0.00498126	0.0212969	-0.0207941	-0.0451806	-0.0425183	-0.00258077	-0.021642	0.011614	-0.016926	-0.0254869	-0.0260719	-0.0155616	0.0131987	0.013731	0.0120846	0.00814943	0.021641	-0.0574645	0.0155866	0.0102332	0.0092971	-0.0442986	0.0874683	-0.0497253	0.0233732	-0.00451347	-0.00655593	0.00966631	-0.0920915	-0.0694382	-0.00242132	0.00282345
V365	0.0516186	-0.0145801	-0.018284	0.0148795	0.0249455	0.0275779	-0.0289147	-0.0193919	-0.0285604	-0.0290488	0.0160698	-0.0310566	0.0271789	-0.0325657	0.00243722	-0.0467157	-0.00740382	0.00854361	0.0311938	-0.0192162	-0.0482867	-0.0372479	-0.0114138	-0.0148733	-0.0138096	-0.0133734	-0.0179552	-0.0225523	0.00443032	0.0206928	0.00150465	0.00710886	0.0111074	0.00694262	-0.0328437	-0.0198762	0.00584988	-0.000411948	-0.0545212	0.0443861	-0.0340106	0.0316236	-0.0224558	-0.00526579	0.0129703	-0.0800069	-0.0473179	0.00481845	-0.0151724
V366	0.0519304	-0.0135745	-0.0249191	0.0291317	0.0197838	0.0262372	-0.0187967	-0.018366	-0.0219429	-0.0199584	0.0255393	-0.024424	0.0388299	-0.0224916	0.0187632	-0.0299519	-0.00386645	0.0209424	0.024857	-0.00965305	-0.0391915	-0.0300097	-0.0256809	0.00111051	-0.0135546	-0.00565649	-0.0109394	-0.0215876	0.0048305	0.0267043	-0.0154566	0.00785155	0.0266442	-0.00687525	-0.00734408	-0.0324467	0.00241065	-0.00499095	-0.0421051	0.0112545	-0.0108556	0.0281105	-0.0366891	0.00737846	0.016393	-0.0589608	-0.0286725	0.0089502	-0.0285712
V367	0.0518629	-0.0112876	-0.0316223	0.0433954	0.0179728	0.0214651	-0.00661175	-0.01585	-0.0161316	-0.00516725	0.0246045	-0.0157484	0.0382706	-0.0195059	0.027527	-0.0216853	-0.00305584	0.032525	0.0100956	-0.00724446	-0.0181901	-0.0299762	-0.0251419	0.0148349	-0.0220782	0.00075749	-0.00239623	-0.0118245	0.00383053	0.0168817	-0.0198459	0.00152579	0.0305278	-0.0167657	0.000416092	-0.0403218	-0.0106814	-0.017685	-0.0436418	0.0108552	0.00451569	0.0169585	-0.0507302	0.0176914	0.0218413	-0.0366327	-0.00455982	0.00263978	-0.0200113
V368	0.0517908	-0.00999775	-0.0349885	0.0505593	0.0220684	0.020241	0.00519214	-0.0147038	-0.0119969	0.00736933	0.0158851	-0.00393259	0.031336	-0.028551	0.0259726	-0.00735046	-0.00541948	0.0299174	0.000408553	-0.0145848	0.00103917	-0.0169012	-0.0221079	0.01337	-0.0235182	0.0215536	-0.019197	-0.00484511	-0.00199535	0.00519705	-0.0189192	-0.00294178	0.0310705	-0.0076171	0.00718957	-0.0383055	-0.0151598	-0.0267896	-0.0385085	0.00173349	0.00481691	0.00572347	-0.0539318	0.0184746	0.0210335	-0.0127877	0.0138932	-0.00456398	-0.0200314
V369	0.0513532	-0.00922196	-0.0349179	0.0587609	0.0311837	0.0152433	0.0167718	-0.0109673	-0.00905698	0.0120141	0.00474022	0.00389964	0.0212224	-0.0284903	0.0216186	0.00228697	-0.00655636	0.0248788	0.00331349	-0.0196423	0.0221415	-0.0206524	-0.00470014	0.00984591	-0.0225473	0.0275591	-0.0221993	-0.0067148	-0.00935316	-0.0124798	-0.00827614	-0.0117138	0.0273194	0.00161441	0.0147056	-0.0394725	-0.027059	-0.0295229	-0.03167	0.000878911	0.0173717	-0.0142223	-0.0475448	0.0161204	0.015552	0.000923156	0.0123366	-0.00994336	-0.00306736
V370	0.0511981	-0.00882698	-0.0345422	0.0594338	0.0390691	0.00567612	0.0215508	-0.0105426	-0.0131924	0.0105232	-0.00558716	0.0135685	0.00974933	-0.0268072	0.022397	0.0105191	-0.00980609	0.0184246	0.000305089	-0.0133094	0.0367283	-0.0161092	0.00531629	0.0114475	-0.0149678	0.0266361	-0.0261735	0.00047814	-0.0143788	-0.0249468	-0.00383392	-0.0131843	0.0219166	0.00781702	0.0154458	-0.0354137	-0.0286647	-0.0265142	-0.0345517	0.00854527	0.01663	-0.0220149	-0.0451608	0.00537424	0.00912803	0.00395157	-7.68382e-05	-0.00286018	0.0103808
V371	0.0507994	-0.00879666	-0.034097	0.0608291	0.0440126	0.00151419	0.0249365	-0.00878775	-0.0083234	0.00937265	-0.0167432	0.0189383	0.00860118	-0.0176851	0.0176194	0.0104586	-0.00795265	0.0150087	0.00188537	-0.00930959	0.0363271	-0.0180229	0.0109991	0.00523469	0.00345544	0.0303034	-0.0263503	0.00904762	-0.0168259	-0.0299773	0.000412862	-0.00109024	0.0108301	0.0178698	0.0124947	-0.0486454	-0.0345918	-0.0242153	-0.0369055	0.0171833	0.0126863	-0.0193613	-0.0368523	-0.010095	0.0157794	0.00805182	-0.0164009	0.00396721	0.02047
V372	0.050861	-0.0104172	-0.0308556	0.058088	0.0481115	-0.00177583	0.0295466	-0.00464797	-0.0106275	0.00920142	-0.0302823	0.0217147	0.0100743	-0.00624728	0.00656438	0.00314428	-0.0135948	0.0084025	0.00481326	-0.00907285	0.0252363	-0.0236824	0.0164612	-0.00851556	0.0165614	0.0267239	-0.0274301	0.0157573	-0.0108591	-0.0323851	0.0129454	0.00547492	0.0143221	0.0103486	0.00619755	-0.0449584	-0.0331651	-0.0102635	-0.0326301	0.0312228	0.0138862	-0.00882018	-0.0261392	-0.0199206	0.0240627	0.0157064	-0.0268342	0.0003002	0.0240004
V373	0.0510109	-0.0121127	-0.0268944	0.0534166	0.0515262	-0.00126056	0.0289657	0.00312244	-0.0112926	0.0142795	-0.0422755	0.0197079	0.0217903	0.0140745	-0.00122883	-0.0043004	-0.017237	0.00566208	0.00748108	-0.00709768	0.00355343	-0.0308421	0.019753	-0.0131596	0.0268825	0.0245673	-0.00737381	0.0132631	-0.0056965	-0.0297159	0.0167686	0.00163834	0.0216332	0.00153709	-0.00404836	-0.0490101	-0.0131631	0.0131994	-0.0375493	0.0399074	0.0133215	-0.000748148	-0.0090986	-0.0228939	0.0305224	0.00249808	-0.031876	-0.00497703	0.0337502
V374	0.0506237	-0.0133816	-0.0208548	0.0465279	0.0599354	-0.000982116	0.0303444	0.00778062	-0.0148405	0.0292619	-0.0490078	0.0141727	0.0345247	0.0351368	-0.0149968	-0.0065355	-0.0214877	0.00744969	0.0268443	0.00177432	-0.0185242	-0.0281703	0.0135633	-0.0152861	0.0254386	0.0232725	0.00339593	0.0179761	-0.00373699	-0.0039818	0.00903171	-0.0131984	0.0288069	-0.016925	-0.0127565	-0.0572205	-0.00861696	0.0168257	-0.0180844	0.044887	0.0208421	0.00724473	-0.00160108	-0.0217579	0.0313372	0.00198185	-0.0368774	0.00261948	0.016161
V375	0.0504045	-0.0147868	-0.0107899	0.0388718	0.0609251	-0.00625829	0.0372205	0.0128678	-0.0100329	0.0431776	-0.046445	0.0167153	0.041064	0.0379832	-0.0171837	-0.0183134	-0.0162	0.0203483	0.0258907	0.000167979	-0.0292901	-0.0192136	0.0153491	0.000380551	0.0210714	0.0210976	0.0206231	0.0197122	0.00114624	0.0138398	0.00172925	-0.0199297	0.0289737	-0.0113515	-0.0100172	-0.0562435	-0.00276843	0.00357807	0.00376573	0.0518028	0.0404846	0.0192609	-0.000868494	-0.0062846	0.0413225	-0.0076975	-0.0229181	0.00730379	-0.00222177
V376	0.0498089	-0.0178015	-0.00169656	0.0324001	0.0566254	-0.00255443	0.0430288	0.00713841	-0.0016662	0.0575396	-0.0413292	0.0187679	0.0506003	0.0319607	-0.0173521	-0.0248897	-0.00672296	0.0332999	0.00907279	0.0122857	-0.0351522	-0.0140939	0.00571296	0.022321	0.00452749	0.0290536	0.0370007	0.00389052	-0.00969146	0.0286789	0.0100348	-0.0224994	0.0295009	-0.0289941	-0.00619671	-0.0475026	0.0126685	-0.00368477	0.0219467	0.0250763	0.071564	0.0169551	-0.00226228	0.0150335	0.0393571	-0.0246697	-0.0156477	0.0308439	-0.0397827
V377	0.0490691	-0.0188258	0.0051361	0.0254957	0.0561029	0.00535124	0.0472579	-0.00324907	-0.00728869	0.0754503	-0.0334417	0.0235845	0.0431165	0.0265285	-0.0224631	-0.0107257	-0.000834377	0.031676	0.00390856	0.013614	-0.0286936	0.0123537	0.00996045	0.0390281	-0.0225677	0.0454528	0.0451816	0.00894538	-0.0127159	0.0249845	0.0203931	-0.0336279	0.0114594	-0.0339689	0.0109509	-0.0297528	0.0121375	-0.00595426	0.0287048	0.0104492	0.0867661	-0.00542992	-0.008158	0.027931	0.0359838	-0.0272341	0.0113795	0.0365084	-0.0648685
V378	0.0479654	-0.0221961	0.00871952	0.0283024	0.0630002	0.00753622	0.0433238	-0.0173094	-0.00483662	0.088954	-0.0201319	0.0455491	0.0335889	-0.00459079	-0.00109649	0.00109794	0.0189495	0.0215481	-0.00207399	0.0039335	-0.00835527	0.0218537	-0.00794232	0.0590196	-0.0231896	0.0489515	0.0386154	0.00890394	-0.0105381	0.017799	0.0398202	-0.0403795	0.0199994	-0.0196817	0.0191417	0.009076	0.0119306	-0.00398965	0.0310746	0.0223527	0.0855462	0.00537479	-0.00710574	0.0329613	0.0243543	-0.0771268	0.0619043	0.0323956	-0.0507489
V379	0.0470388	-0.0253789	0.0162715	0.0261687	0.0731306	0.000852674	0.0368235	-0.0110444	0.00439839	0.0791936	0.011316	0.0414182	0.0276451	-0.0236803	0.016653	0.0300219	0.0219782	0.0204928	-0.0137201	0.000817215	0.02488	0.0292378	-0.0194332	0.0520847	-0.0125225	0.0538149	0.0319638	0.0150166	-0.0191033	0.00992914	0.0431382	-0.0136746	0.0280446	-0.0204361	0.0278159	0.035776	0.00507724	0.026109	0.0334443	0.0558725	0.0636356	-0.0032036	-0.0241467	0.0645352	0.0326851	-0.0829827	0.101735	0.0126455	-0.0421703
V380	0.0460572	-0.03123	0.0177271	0.0241929	0.0761533	-0.00186167	0.0298512	0.00217766	0.0101354	0.0456479	0.0199964	0.0409969	0.0128347	-0.00492619	0.0106491	0.0589619	0.0149214	0.00266723	-0.026032	0.00134146	0.0370969	0.0356888	-0.0387874	0.0130658	-0.00485161	0.068923	0.00239291	0.0282344	-0.0192639	0.00599792	0.0483744	0.0311219	0.0271216	-0.00661051	0.0218232	0.0150536	0.0452108	0.0434335	0.0301365	0.0476185	0.0324914	0.00117354	-0.0307027	0.0687987	0.044431	-0.100968	0.101755	-0.019038	-0.0510167
V381	0.0448028	-0.0352259	0.0281357	0.00580133	0.0750998	-0.00961177	0.0336433	0.0104381	0.0166122	-0.0190934	0.0410813	0.0450944	0.00877195	0.0258188	0.00900402	0.0830483	-0.00609441	-0.0122411	-0.00944661	0.0117281	0.0674522	0.0243004	-0.0248853	-0.0286702	-0.0068053	0.0500647	-0.022031	0.0161767	-0.00991117	-0.00347889	0.0438334	0.0387003	0.00260999	0.0110718	-0.00481018	0.0261954	0.0466018	0.0732918	0.0293127	0.0383602	0.0205715	0.0250249	-0.00963417	0.0401602	0.0549918	-0.0951078	0.0823179	0.00212661	-0.00664487
V382	0.0415009	-0.0365841	0.0293355	-0.00717706	0.0871723	-0.013839	0.0318726	0.00590894	0.0134981	-0.0727512	0.032848	0.0633508	0.0153791	0.0781554	0.00719756	0.0671995	-0.0126128	-0.00785708	-0.00421384	0.0367637	0.060662	0.0160461	-0.0185283	-0.084873	-0.000841503	0.0261216	-0.00758	0.0050222	-0.00404706	-0.00809657	0.0359699	0.0484467	-0.0564837	-0.00352414	-0.0161662	0.0577089	0.0599679	0.0827404	0.0160995	0.00806112	0.0335105	0.0264222	-0.0089171	-0.0134908	0.0402872	-0.039093	0.045036	0.0291441	0.0429773
V383	0.0383363	-0.0391504	0.029303	-0.0189346	0.0727633	-0.0120974	0.00211307	0.00286275	0.0250975	-0.104815	0.0249975	0.0889632	0.0346294	0.108799	0.0194934	0.0478276	0.00021867	-0.00936007	-0.00170388	0.0474153	0.0597768	0.0229082	-0.0160081	-0.0982908	0.00950355	0.0326376	-0.00295153	-0.0211299	0.00292431	-0.00268407	0.039048	0.0725135	-0.0826195	-0.0180451	-0.0112717	0.0401291	0.0438482	0.0632068	-0.0197612	-0.0132271	0.0139238	0.0133203	0.0312594	-0.0225717	0.0532676	0.0139095	-0.0049793	0.0551182	0.0724308
V384	0.0389101	-0.0368049	0.0291965	-0.0338318	0.0514354	-0.00345196	-0.00695792	-0.00986468	0.0217579	-0.111366	0.00120872	0.0971024	0.0609073	0.0993596	0.00248477	0.00105923	0.00888651	0.0207166	-0.00843166	0.0620684	0.0550757	0.0124577	-0.0162901	-0.0798215	-0.0133887	0.0286486	-0.00472199	-0.047694	-0.0564184	0.0227926	0.0772353	0.0730204	-0.0737985	-0.0421302	0.0152947	0.0472982	0.0445978	0.00400792	-0.0225013	-0.0272041	0.0141546	-0.0294128	0.0373641	-0.0287392	0.0375983	0.0522642	-0.0636464	0.0654669	0.0692365
V385	0.0395111	-0.0390401	0.0328764	-0.0359285	0.0494937	0.00693202	-0.01247	-0.015415	0.0143324	-0.0923751	-0.0134265	0.10404	0.077897	0.0512206	-0.0108448	-0.0286091	0.012966	0.0390662	-0.00568026	0.0634826	0.0566649	0.00516261	-0.0103922	-0.0413271	-0.0572846	0.0372365	0.00304157	-0.0586385	-0.0578824	0.0570116	0.113121	0.0403597	-0.0732845	-0.0442188	0.0208993	0.0234928	0.00707641	-0.040226	-0.00466331	-0.0162286	0.0140513	-0.0367836	0.00607371	-0.00661255	0.043842	0.043716	-0.0694188	0.0353301	0.0476971
V386	0.0393436	-0.0430555	0.040029	-0.0429371	0.052041	0.0145365	-0.00515424	-0.030419	0.0208915	-0.0644463	-0.0132399	0.084846	0.073055	0.00691697	-0.00938794	-0.0418918	0.00196035	0.0317098	0.0179466	0.0744119	0.0654469	-0.000225726	-0.00622873	0.010129	-0.0605563	0.0362288	-0.0136764	-0.0623701	-0.0469991	0.0791198	0.0893352	0.0311473	-0.0632498	-0.0316803	0.0430297	0.011456	-0.0293383	-0.0337233	0.00985454	-0.0248255	0.0265478	-0.0351924	-0.000758437	0.0294483	0.0508992	0.0200197	-0.0820465	-0.00871324	0.016273
V387	0.0387385	-0.045775	0.041091	-0.0484867	0.0486486	0.0166677	-0.00882359	-0.0371561	0.0250953	-0.0333992	-0.00596504	0.0635504	0.0520959	-0.00580144	-0.00395575	-0.0503247	-0.0217593	0.0183881	0.0253527	0.0951761	0.0777706	-0.0140655	0.0009518	0.0778353	-0.0654848	-0.0119106	-0.00849166	-0.0116777	-0.0177778	0.0682864	0.0669016	0.0352012	-0.0312608	-0.0340595	0.0346176	-0.0143722	-0.0508317	-0.0140485	0.0121038	-0.0102699	0.0522761	-0.0225427	-0.0150717	0.0817993	0.089652	0.00363139	-0.0467548	-0.0611947	-0.0115224
V388	0.0392767	-0.0463737	0.0358366	-0.0504989	0.0479454	0.0198798	-0.00365827	-0.0441734	0.0323496	-0.00940073	0.00189616	0.0363166	0.0312825	-0.0150359	0.000708533	-0.0591351	-0.0350685	0.00811755	0.0171152	0.078066	0.0783056	0.000453142	0.00258426	0.100701	-0.052958	-0.0285729	-0.0146958	0.0350138	-0.00062934	0.0408143	0.0517983	0.0676808	0.00607331	-0.0517129	0.0258934	-0.0289573	-0.0321535	0.0137272	0.0135827	0.0148579	0.0378588	0.0123538	-0.0405581	0.0935983	0.100735	-0.010171	-0.0430257	-0.0925485	-0.0500936
V389	0.0419371	-0.043454	0.026733	-0.0478229	0.0572886	0.0227622	-0.00541335	-0.0234837	0.0350287	0.0121368	0.0101614	0.0133053	0.0292249	0.0171897	0.00306737	-0.0544992	-0.0204367	0.00785682	0.0102568	0.0446872	0.0806015	0.0129382	0.0208055	0.08781	-0.033798	-0.031563	-0.0364958	0.0457055	0.0108378	0.00697166	0.0470825	0.0676959	0.010659	-0.056953	0.00514379	-0.0444583	-0.0156803	0.0326179	0.0113674	0.0190317	0.0237068	0.0445094	-0.0579142	0.0907891	0.0758931	-0.00193754	-0.0278072	-0.117922	-0.0834231
V390	0.0443065	-0.0398073	0.0174712	-0.046284	0.0688152	0.013572	-0.00810128	-0.0163738	0.0358383	0.00791425	0.00124122	0.00897054	0.00413791	0.0253727	0.00986621	-0.0371354	0.00204798	0.0187785	0.00217229	0.04298	0.0697365	0.0250652	0.0362036	0.0699332	-0.0261686	-0.0320079	-0.0400719	0.0500667	0.0108892	-0.0139242	0.025611	0.0686797	0.00886942	-0.0640953	-0.00241433	-0.0511956	0.00529942	0.0382587	0.0279218	0.0329044	-0.021373	0.0518647	-0.0381373	0.0743066	0.0320373	-0.0118808	-0.00972909	-0.111341	-0.0639203
V391	0.0466631	-0.0364135	0.00784072	-0.0390894	0.0753321	0.00915232	-0.0080455	-0.0149772	0.0324935	0.0142644	0.00889813	0.0194871	-0.00672088	0.0393589	0.00178042	-0.024288	0.0164649	0.0441298	0.0071566	0.0319238	0.0491052	0.0403816	0.0387966	0.0320414	-0.0187673	-0.00247644	-0.0431893	0.0503595	0.0108861	-0.0364618	-0.0102777	0.0619063	-0.0147014	-0.0796123	-0.0164823	-0.0310624	0.00131841	0.0314561	0.0223416	0.00793865	-0.0255836	0.0366184	-0.0191362	0.028352	0.0174053	-0.0176893	-0.0205276	-0.0712711	-0.047182
V392	0.0485704	-0.0326086	0.000712953	-0.0300588	0.0689475	0.0127942	-0.00434318	-0.0245292	0.0187408	0.0214825	-0.0019807	0.0206182	-0.000874587	0.0441494	-0.00796018	-0.021097	0.0250627	0.0596806	0.0141208	-0.00190664	0.0406915	0.0467081	0.0482326	0.00182011	-0.0323448	0.019404	-0.0284785	0.0429399	0.0133249	-0.0452369	-0.0196436	0.059318	-0.0388491	-0.0723641	-0.0183726	-0.000938658	0.00615464	0.00177616	0.00811964	-0.0115633	0.00798268	0.0302508	0.0122299	-0.00226806	-0.000396131	-0.0103626	-0.0255076	-0.0164397	-0.0356807
V393	0.0503937	-0.0291787	-0.0033807	-0.0194582	0.0536134	0.0170373	0.00291355	-0.0232404	0.0140188	0.029234	-0.0123167	0.0192595	0.0102746	0.0304533	-0.00427499	-0.0201281	0.0327124	0.0514109	-0.000127287	-0.0108022	0.0212274	0.0452103	0.030551	-0.0230169	-0.0326529	0.0199255	-0.00765076	0.0208663	0.00346877	-0.0439427	-0.0285823	0.0598483	-0.0456443	-0.0373633	-0.0157294	0.0179743	0.0117837	-0.0194207	-0.0147059	-0.0395637	0.0236665	0.0179762	0.0226667	-0.0491286	-0.0328827	-0.0349439	-0.046696	0.0229357	-0.0253172
V394	0.0510729	-0.0286474	-0.00674845	-0.00637083	0.0439491	0.0158715	0.00793951	-0.0130501	0.0134891	0.0311402	-0.0150284	0.022308	0.0159355	0.0081288	-0.0071614	-0.011353	0.0196695	0.0312367	0.0192204	-0.0102448	0.00206877	0.0388432	0.00588795	-0.0418554	-0.0434214	0.0172972	-0.018153	0.00679212	-0.0107929	-0.00552993	-0.0236334	0.0364054	-0.042463	-0.0152993	-0.006308	0.027122	-0.00740532	-0.0390927	-0.0257004	-0.0538644	0.0461001	-0.000233453	0.0507564	-0.0691849	-0.0409751	-0.049299	-0.0405239	0.0429554	-0.0157079
V395	0.0516952	-0.0263425	-0.00650671	0.00271324	0.0418349	0.0149473	0.00473895	-0.00375621	0.0113932	0.0246088	-0.0111962	0.0210476	0.0158107	-0.00459957	-0.0153959	-0.0219612	0.0029213	0.0296751	0.0196042	-0.0120516	-0.00137572	0.0411613	-0.0161661	-0.041832	-0.0413886	0.0153206	-0.0219178	-0.00987958	-0.0219172	0.0201866	-0.00929541	0.0222326	-0.0369084	0.0135723	-0.00660613	0.012225	-0.00425112	-0.0510431	-0.0282625	-0.047555	0.0429643	0.0146224	0.0440723	-0.0528763	-0.0357847	-0.0442492	-0.00822058	0.0366659	-0.00976015
V396	0.0519716	-0.0248845	-0.00612897	0.00932702	0.0428679	0.0079552	0.00678157	0.00368868	0.0123546	0.0185746	-0.00656664	0.0152562	0.0147784	-0.00721856	-0.0175532	-0.0316635	-0.000474079	0.0321463	0.0142019	-0.00947398	0.000827859	0.0300372	-0.0370971	-0.032106	-0.0262944	0.00396218	-0.0366854	-0.00767505	-0.0262064	0.0445052	-0.0213595	0.0108795	-0.0218433	0.0328633	-0.00563951	0.0042243	0.00399917	-0.0541808	-0.0262154	-0.0427198	0.0336563	0.0265644	0.0451425	-0.033157	-0.0357646	-0.0325082	0.000681105	0.0269236	-0.0211832
V397	0.0515721	-0.0259985	-0.00446584	0.00857469	0.0438549	0.00167559	0.00356607	0.0156685	0.0123705	0.0102417	-0.00135613	0.00140645	-0.000252157	0.000391997	-0.0101146	-0.0314363	0.0078839	0.0203213	0.00646476	-0.01061	0.00994614	0.00909809	-0.0476072	-0.0250085	-0.030027	-0.0128271	-0.0385709	0.00359657	-0.0486005	0.0574523	-0.0345266	-0.00384874	-0.0216589	0.033269	-0.0204435	-0.0063659	0.00979055	-0.0349317	-0.0221914	-0.053479	0.0324574	0.0268399	0.0347414	-0.00661835	-0.0258724	-0.0261608	0.0129916	0.00163126	-0.0309451
V398	0.0508751	-0.0257856	-0.00189025	0.00363053	0.050709	0.00531267	0.00977701	0.0218142	0.0213374	0.00315964	0.00483241	-0.00278924	-0.0118359	0.0051336	-0.00477744	-0.0423206	0.0223384	0.00560765	-0.00302547	-0.0216143	0.0212148	-0.00486736	-0.0357935	-0.0136564	-0.0201496	-0.037204	-0.0532942	0.0157418	-0.0515296	0.057417	-0.0373256	-0.0245001	-0.0359846	0.0599578	-0.0247361	-0.0151362	0.0205443	-0.0220981	0.00186382	-0.0311296	0.0283063	0.0271475	0.0182698	-0.00139821	-0.0327458	-0.0207119	0.00612568	-0.00962548	-0.033026
V399	0.049426	-0.0274875	-0.00185248	-0.00911824	0.0640737	0.0112827	0.0109795	0.0208273	0.0359132	-0.0122502	0.00930356	-0.00194653	-0.030566	0.0379701	0.00374651	-0.0584171	0.0351871	0.0017945	-0.00108139	-0.0369777	0.0109299	-0.0248653	-0.00820827	-0.000409932	0.00446766	-0.0557841	-0.047918	0.00963819	-0.0355278	0.0540858	-0.0483492	-0.0286506	-0.0366725	0.0594847	-0.032191	-0.00873594	0.0241344	-0.000586924	-0.00776408	-0.0156765	0.0103115	0.0169867	0.0153585	0.00700134	-0.0342694	0.00428857	0.0143446	-0.0158353	-0.0272248
V400	0.045603	-0.032685	-0.0118808	-0.0233261	0.0745199	0.0307418	0.0104646	0.00851488	0.0675102	-0.0205931	0.00961896	-0.00817119	-0.045384	0.0704874	0.0109579	-0.0620532	0.0701419	-0.00174229	-0.0278087	-0.0359258	-0.0114886	-0.0260846	-0.00355073	-0.00285485	0.0271487	-0.0450973	-0.0583868	-0.0104795	-0.0335447	0.0308747	-0.0297945	-0.0259764	-0.0427846	0.0618943	-0.0426449	-0.0152193	0.0361816	0.00577988	-0.0182196	-0.0144392	-0.0238917	-0.00363462	0.0220627	0.00167615	-0.0376951	0.0306082	0.0213959	0.00447571	-0.0172868
V401	0.0432786	-0.0348238	-0.0218898	-0.0256363	0.0592804	0.0461569	0.0142128	-0.0182114	0.0954119	-0.0244896	0.0182227	-0.00626474	-0.0384745	0.071707	0.0122888	-0.0436764	0.0917283	-0.00488898	-0.0347836	-0.0267753	-0.0417045	-0.0123025	0.0231434	-2.61326e-05	0.0483633	-0.0402225	-0.0420678	-0.0323317	-0.00337401	0.00364203	-0.00688439	-0.0627674	-0.0196896	0.0544614	-0.0358191	-0.036746	8.20977e-05	-0.00126091	0.00557326	-0.0137165	-0.0443335	-0.0720277	0.0422103	0.00206346	-0.0557727	0.0127649	0.00462641	0.0303763	-0.0370803
V402	0.0424243	-0.0356099	-0.0287834	-0.024182	0.0508167	0.0608813	0.020055	-0.0448494	0.0972442	-0.0155371	0.0137891	-0.00807838	-0.0248306	0.0547437	0.00376473	-0.0228137	0.0808838	0.00957949	-0.0510689	0.00252484	-0.0563281	-0.0218139	0.0152611	-0.0220076	0.0376905	-0.0247642	0.00021965	-0.0508697	0.019781	-0.0186914	4.16873e-05	-0.0864154	-0.0147001	0.00535761	-0.0409455	-0.0330089	-0.0278338	-0.00527126	0.0239095	-0.0208945	-0.0256967	-0.0930201	0.0238634	-0.0175892	-0.0557412	-0.0054839	-0.016998	0.0228443	-0.0412377
V403	0.0419317	-0.0387764	-0.0284133	-0.0211878	0.0345794	0.0602234	0.0241449	-0.0632746	0.108182	-0.00939168	0.0131561	-0.0182538	-0.00759339	0.0445567	-0.00377202	-0.00201887	0.0614757	0.0015814	-0.0580415	0.0133663	-0.0664375	-0.0136526	0.00336821	-0.0280656	0.0200285	0.00286989	0.00669275	-0.0431775	0.0593144	-0.0223938	0.0005005	-0.0770172	-0.0168705	-0.0119608	-0.0425673	-0.0289226	-0.0379596	0.018894	0.039581	-0.0325861	0.00202703	-0.0931588	0.0210708	-0.0284787	-0.0328813	-0.01714	-0.0077525	0.00322019	-0.042893
V404	0.0437482	-0.0343231	-0.0339299	-0.021547	0.0243425	0.0572521	0.031937	-0.0793725	0.0931553	-0.000573477	0.0149648	-0.0264727	-0.0073354	0.0416625	-0.00852338	0.00965262	0.0357688	0.0089428	-0.0501268	0.012146	-0.0591431	0.00498245	-0.00455598	-0.0325768	0.00668156	0.00739225	0.0125034	-0.0352789	0.0633771	-0.0101889	0.00873017	-0.0510364	-0.00456007	-0.0350483	-0.0180473	-0.0065012	-0.0327066	0.0334121	0.0392883	-0.0431553	0.0331888	-0.0733466	0.0484148	-0.0213716	-0.020263	-0.00313496	0.009736	-0.00618841	-0.0463248
V405	0.0452024	-0.0314555	-0.0365565	-0.0177771	0.0174229	0.0508643	0.0330617	-0.0831571	0.0819537	7.63246e-05	0.00653409	-0.0302252	-0.0100991	0.0472499	-0.00728483	0.0166285	0.0109471	0.0149827	-0.0405186	0.0106524	-0.0547394	0.0112461	-0.012879	-0.0360143	-0.00472613	0.00106163	0.0229072	-0.0186966	0.0528781	-0.00130965	0.0171282	-0.0424953	0.000315833	-0.0394987	-0.0032535	-0.0132197	-0.0177712	0.0391494	0.0412281	-0.0525428	0.047737	-0.0517365	0.0409108	-0.00873032	-0.0227981	0.00137731	0.0295971	-0.0188949	-0.0631271
V406	0.0474371	-0.0272513	-0.0371275	-0.0122223	0.0112993	0.0388617	0.0358561	-0.0757945	0.0717788	-0.00537487	0.00452218	-0.0262898	-0.0133267	0.0588143	-0.00174054	0.0155296	0.0081277	0.0162571	-0.0182719	0.0072614	-0.0343814	0.0274134	-0.0149456	-0.0387946	0.00696874	-0.00444964	0.0124934	-0.00913226	0.0457573	0.00497612	0.0187557	-0.0293837	0.00528511	-0.0341651	-0.00073727	-0.0165873	-0.00641568	0.0309511	0.0293492	-0.0568314	0.0539499	-0.0284295	0.0281405	-0.000861891	-0.022437	0.0256259	0.0257901	-0.0127868	-0.0594772
V407	0.0488441	-0.0234705	-0.0368572	-0.0148015	0.00888485	0.026596	0.0326181	-0.0691387	0.0665946	-0.0116244	-0.000552107	-0.0142451	-0.0156075	0.0703699	-0.00544283	0.0160834	0.00811384	0.0122744	-0.00291745	0.00644894	-0.0165794	0.0238704	-0.0218148	-0.0331945	0.0168572	-0.0158619	0.00911883	0.00624339	0.0336626	0.0050578	0.0199147	-0.0180272	0.00629356	-0.0265491	0.0055065	-0.0213693	0.000839923	0.018777	0.02667	-0.0459924	0.0403176	8.50067e-05	0.0387591	0.00783587	-0.0202755	0.0503814	0.0387573	-0.0157261	-0.0457975
V408	0.049168	-0.0216993	-0.0387515	-0.0184913	0.000616951	0.0202142	0.0332613	-0.0652811	0.0654861	-0.0142103	0.00111617	-0.00542852	-0.0159591	0.070034	-0.0121967	0.0111159	0.00617211	0.00347127	0.00458117	0.00125738	0.00149904	0.0193009	-0.0221193	-0.0324252	0.0178748	-0.0313439	0.0171546	0.0308939	0.0224507	-0.0106513	0.01505	-0.0110016	0.0144077	-0.0234585	0.0164496	-0.0203535	0.00676983	0.0165073	0.0125331	-0.0340022	0.0331451	0.0128331	0.0447583	0.0137565	-0.000407642	0.0628393	0.0321876	-0.0225028	-0.0331526
V409	0.0489594	-0.0204942	-0.0405501	-0.0216111	-0.00720557	0.0156966	0.0323894	-0.0611872	0.061982	-0.00631449	0.0162388	0.00537888	-0.00764198	0.0799517	-0.0194811	0.0082155	0.0161213	-0.00220261	0.00933108	-0.0065761	0.0225329	0.0203591	-0.0177621	-0.0267042	0.0192234	-0.0466	0.030303	0.0400384	0.0167189	-0.0134171	0.011179	-0.00518626	0.0111787	-0.0144994	0.0131806	-0.0244909	0.00404995	0.00461066	0.00599501	-0.0277409	0.0265928	0.0170681	0.0399952	0.00892633	0.0207767	0.0738651	0.0237456	-0.0185133	-0.0159434
V410	0.0489422	-0.0205129	-0.0400593	-0.021807	-0.0103297	0.0104513	0.0316431	-0.0540951	0.0673367	0.00705185	0.0284866	0.00975229	0.0038892	0.0722788	-0.0231535	0.0051357	0.0203	-0.00838123	0.00842345	-0.0127269	0.0324661	0.019361	-0.0160848	-0.0140507	0.024639	-0.061392	0.0474678	0.0441162	0.0185115	-0.0148431	0.0180486	0.00366603	0.00102088	0.00603614	0.0102919	-0.0375335	0.0127611	-0.00971852	0.00706944	-0.0151356	0.0166309	0.0280714	0.0307885	0.00221323	0.0263137	0.0539979	0.0139702	-0.00132911	0.00617928
V411	0.0484742	-0.0229087	-0.0414967	-0.0223344	-0.0107685	0.00356757	0.0297445	-0.0471138	0.0725227	0.0206701	0.043173	0.0243268	0.0091116	0.0594799	-0.0324551	-0.00106147	0.0165992	-0.00980374	0.0104416	-0.00991666	0.0217552	0.0177069	-0.00601161	-0.00181987	0.029544	-0.0606493	0.0407603	0.0374516	0.03192	-0.0189403	0.0173754	-0.00265651	0.00437748	0.0105514	0.00880887	-0.0274539	0.0117025	-0.0152927	0.0047339	-0.00111795	0.000775665	0.00648839	0.0183107	0.0018041	0.0284885	0.0479289	-0.00247123	-0.0122942	0.01795
V412	0.0483793	-0.0244515	-0.0411058	-0.0237406	-0.0025558	0.0022044	0.0265172	-0.0513437	0.0719905	0.0325571	0.0483553	0.0256222	0.0145927	0.0495923	-0.0468347	-0.00750543	0.00582515	0.00192664	0.0102906	-0.0107011	0.0151275	0.0135064	0.00846614	0.0149875	0.0176154	-0.034059	0.0172664	0.0251074	0.0423324	-0.0185615	0.0232679	-0.0124367	-0.00281204	0.00749655	0.00307502	-0.0147053	0.013314	-0.0231213	0.00646527	0.00918457	-0.00337334	-0.000711248	0.0258527	0.0162321	0.040157	0.0419549	0.00731696	-0.0169907	0.0187519
V413	0.0479497	-0.026093	-0.0389827	-0.0281144	0.00844211	-0.00154177	0.0251225	-0.0573495	0.0678495	0.0396502	0.0445379	0.0276145	0.0220291	0.0463535	-0.0592061	-0.00248921	0.00439161	0.0101803	-0.00120976	-0.00656598	0.00348054	0.00545732	0.0208857	0.0384843	0.0172748	-0.00638061	0.00670767	0.00292957	0.0351982	-0.0226038	0.0147236	-0.0242012	-0.0185451	-0.00217216	-0.0111443	0.00602494	0.0262128	-0.0205651	0.00878193	0.0118872	-0.0195482	-0.0207454	0.008557	0.021313	0.0310438	0.0237669	0.00640631	-0.019856	0.00308725
V414	0.0478821	-0.0289898	-0.0359549	-0.0313104	0.0234858	-0.00428346	0.0302576	-0.0535071	0.0677071	0.0361392	0.0396276	0.0302401	0.0184878	0.0322916	-0.0530643	0.00748604	0.00768395	0.00524401	-0.0108998	-0.00973273	-0.00414971	-0.00353952	0.0256136	0.0425324	0.0120249	0.0064829	-0.0156907	0.00749614	0.0303944	-0.0135062	-0.00541338	-0.0317474	-0.030604	-0.00305242	-0.0160032	0.0267805	0.025496	-0.0257706	0.00958803	0.012792	-0.00706818	-0.0317457	0.0101385	0.00493012	0.0124151	0.000212214	-0.00351142	-0.0208498	0.00330246
V415	0.0479208	-0.0316326	-0.0327732	-0.030109	0.0311336	-0.000200463	0.0299182	-0.0456227	0.0676616	0.020731	0.0234905	0.0353961	0.0146629	0.0312081	-0.0571818	0.0123232	0.0055718	0.000165652	-0.0195479	-0.0219824	-0.0106892	-0.00699087	0.0278383	0.041162	-0.00281711	0.0242932	-0.0325425	-0.00237488	0.0175378	-0.00814685	-0.0112424	-0.022706	-0.0298976	-0.00567513	-0.0132948	0.0394561	0.0313855	-0.0328716	0.0054602	0.0136555	0.00313872	-0.0224662	0.00867298	0.00554351	-0.0170465	-0.0162499	0.00451292	-0.0210886	-0.0137341
V416	0.0478754	-0.0334577	-0.0314984	-0.0258997	0.0403456	0.0023818	0.0379428	-0.0428411	0.0636863	0.00723979	0.0233427	0.0341507	0.00861401	0.0305783	-0.0597093	0.0113906	0.00241844	0.00574197	-0.00967061	-0.024441	-0.0162793	-0.00425856	0.0242091	0.0215153	0.00757124	0.0174831	-0.0343268	0.00219564	0.0179817	0.00206038	-0.0132157	-0.0143784	-0.0359543	0.0216168	0.0125547	0.0349166	0.0113279	-0.0360659	-0.0138017	0.0144607	0.0129553	-0.0149448	0.0252749	-0.00365252	-0.0157118	-0.0157515	0.0281614	-0.0125758	-0.0193798
V417	0.0471646	-0.0367378	-0.0303013	-0.0191195	0.0458769	0.00612061	0.0398939	-0.0391847	0.0630518	0.00864832	0.0125533	0.0226706	-0.0145901	0.0441319	-0.0576272	0.0246562	0.0132473	-0.00136865	-0.00649457	-0.0216406	-0.00374737	-0.0124464	0.0187313	0.0146836	0.00905376	0.00813232	-0.0292389	0.00256176	0.0077428	0.0114044	-0.0173013	-0.00841607	-0.0243199	0.0341768	0.0191113	0.0293993	-0.00558585	-0.0277074	-0.0389595	-0.00584802	0.0159053	0.00396753	0.0438689	0.00525873	-0.00560913	-0.0106441	0.0415595	-0.00446691	-0.0191587
V418	0.0470986	-0.0367055	-0.0273841	-0.00626332	0.0452118	0.0156013	0.0437206	-0.0308681	0.0683095	0.00370056	0.00548881	0.0207688	-0.0126472	0.0303661	-0.0450405	0.0393665	0.0246663	-0.0190597	-0.0025334	-0.0137691	0.0105615	-0.0173065	0.0163866	0.0109482	0.00937571	-0.00806345	-0.0284434	0.00930734	-0.000535319	0.0170806	0.00489933	-0.0186208	-0.00125094	0.0640977	0.0200339	0.00667964	-0.0387637	-0.0410612	-0.052313	-0.000843599	0.0154973	0.019653	0.056994	0.000209587	-0.00439539	-0.00174445	0.0419616	0.0190087	-0.00930362
V419	0.0472794	-0.0349418	-0.023808	0.000342117	0.0428119	0.0143166	0.0413913	-0.0252296	0.0725361	0.0112668	-0.00225665	0.0189869	0.00615322	0.00976157	-0.036889	0.050117	0.0276948	-0.0308618	0.00836886	0.00267488	0.0375469	-0.0343329	0.0170987	0.0173359	0.00192744	-0.0331954	-0.0103383	0.0184681	-0.0174222	0.0283815	0.0233714	-0.0185126	0.0318969	0.0574718	0.0079909	-0.0210502	-0.0447825	-0.0465152	-0.0759709	-0.0200392	0.0223741	0.0152616	0.064708	-0.00966101	0.0117935	0.00491594	0.0462694	0.00373941	0.0074803
V420	0.0478244	-0.0344905	-0.0153891	-0.00251931	0.0448119	0.0118381	0.0322488	-0.0197467	0.0752934	0.0151906	-0.0036879	0.0225622	0.0211608	-0.00669879	-0.0353688	0.0451156	0.0234288	-0.0369019	0.00455825	0.0103207	0.0513798	-0.0396188	0.00691012	0.0157572	-0.00655234	-0.0287085	-0.0128912	0.0241267	-0.0407771	0.0268941	0.0512547	-0.0184231	0.0443115	0.0352349	-0.0258934	-0.0223956	-0.0500722	-0.0277857	-0.0774881	-0.0318287	0.0114326	0.0282861	0.0517014	-0.0295319	0.0394821	0.0087189	0.0259517	-0.0203575	0.0280122
V421	0.0475821	-0.030482	-0.00712178	-0.0114745	0.0452286	0.00935336	0.0258252	-0.0306539	0.0774079	0.0209552	0.000195745	0.0251772	0.0454997	-0.029747	-0.0352678	0.0602486	0.0266287	-0.0306108	0.0193394	0.0108476	0.0469742	-0.0396793	0.0108206	0.0202661	-0.0123793	-0.0252843	-0.0138071	0.0299663	-0.0530622	0.0405804	0.0666137	-0.004297	0.0459762	0.0194929	-0.0524441	-0.0104896	-0.0454629	-0.0127673	-0.0728922	-0.0245242	0.00674705	0.0139373	0.0361361	-0.0473111	0.0486544	-0.00523579	0.0195053	-0.0437727	0.0203926
V422	0.0480513	-0.027799	-0.00689627	-0.0208558	0.0496113	0.0157355	0.00836977	-0.0331302	0.0687826	0.0284915	-0.00212318	0.044295	0.0436589	-0.0389035	-0.0440558	0.0641388	0.0166115	-0.0161213	0.025832	0.0114588	0.00714113	-0.0322269	0.00642025	0.0160708	-0.0140096	-0.0169792	-0.0139702	0.0241775	-0.0541962	0.0305635	0.0530065	-0.00534123	0.0368033	-0.021943	-0.061283	-0.00456293	-0.0429729	-0.0212685	-0.0553796	-0.0346761	0.00467621	0.00413053	0.00341324	-0.0547893	0.031672	0.00473518	0.0067735	-0.0420035	0.0192481
V423	0.048904	-0.0300974	-0.00457855	-0.0206973	0.045521	0.0130391	-0.00518984	-0.0309649	0.059551	0.00927668	-0.0122209	0.0492743	0.0523766	-0.0272042	-0.0280856	0.0392297	0.00209795	-0.0201596	0.0303401	0.0185702	-0.0393868	-0.0348271	-0.0133206	0.000492999	0.00606948	0.00294195	-0.0390875	0.0360434	-0.036885	0.0175886	0.0371387	0.0108535	0.02416	-0.0422984	-0.077732	0.00576792	-0.0178419	-0.0118521	-0.0284811	-0.0323449	0.0036258	-0.0209944	-0.0524033	-0.0558478	0.0133717	-0.0117203	-0.0130493	-0.0325017	0.018426
V424	0.0497679	-0.0262675	-0.00428258	-0.0232646	0.0468507	0.00806742	-0.0271763	-0.0154812	0.0391795	-0.00891844	-0.0129191	0.0463367	0.0395999	-0.0264561	-0.00903889	0.00732305	0.0176519	-0.0104617	0.0190543	0.0057527	-0.0710442	-0.0229642	-0.0238066	-0.0165713	0.0121894	0.0291557	-0.0647478	0.0338655	-0.0369874	0.00557563	0.0408155	0.00953161	0.0291128	-0.0399647	-0.064863	0.00381663	-0.00271794	-0.0162463	0.0117366	0.0120436	-0.00224583	-0.0157077	-0.0657328	-0.0248426	-0.00845254	0.00526904	-0.0306766	-0.0169481	0.012332
V425	0.0492674	-0.0263253	-0.00923042	-0.0192989	0.0489617	0.00228643	-0.0486193	-0.0029062	0.0230453	-0.0395649	-0.0103212	0.0456976	0.0119169	-0.0161437	0.00270747	-0.0102333	0.0128583	-0.000631632	-0.000334599	-0.00720848	-0.0866931	-0.0312649	-0.0419383	-0.045335	0.00711489	0.0515221	-0.0553921	0.0348865	-0.0392169	0.00124434	0.0364948	-0.00766735	0.014652	-0.0306917	-0.0423968	0.00322506	-0.00514244	-0.0223331	0.0363592	0.0305824	-0.0118673	-0.0382123	-0.0386962	-0.00625361	-0.0269777	-0.0334675	-0.0293412	-0.00268005	-0.0111084
V426	0.0494484	-0.0272036	-0.0172101	-0.00398642	0.0450374	-0.00466843	-0.0661817	0.00487403	0.0106417	-0.0453141	0.0143016	0.0318526	-0.00885474	-0.0022803	0.00947238	-0.0253963	0.0228907	0.00662806	-0.00973417	-0.0117394	-0.0623927	-0.016498	-0.0348104	-0.0393194	0.00300231	0.0405225	-0.0283731	0.0353429	-0.0316127	0.0060022	0.0101989	-0.0147642	0.00202669	0.00306383	-0.0383493	-0.0117137	-0.00601993	-0.0224514	0.0343341	0.0353165	-0.00422812	-0.0446002	-0.0349562	0.00362359	-0.0192383	-0.0412573	-0.0176958	0.0431426	0.000296762
V427	0.0495084	-0.025031	-0.0185825	0.0127548	0.0471424	-0.00711612	-0.0775726	-0.00109559	-0.003782	-0.0337189	0.0301544	0.00612711	-0.0188228	0.00983374	0.0161967	-0.0238131	0.0206102	0.0150816	-0.0133844	-0.0321747	-0.0250947	-0.00629763	-0.0376179	-0.0295916	-0.00984632	0.0230536	-0.00316102	0.0261838	-0.0186099	0.02005	0.00337265	-0.0198439	0.00266191	0.0206291	-0.0273724	-0.0153016	-0.0129607	-0.0126525	0.0342163	0.0333513	-0.00122128	-0.0338473	-0.0285399	0.00958327	-0.0147476	-0.032892	-0.0140026	0.0811923	0.00222654
V428	0.0498454	-0.0213046	-0.0204612	0.0249857	0.0452938	-0.00907899	-0.0808785	0.00200317	-0.016833	-0.0188177	0.0389331	-0.00448122	-0.0133392	0.00664242	0.0234064	-0.02263	0.00393972	0.0163916	-0.0106437	-0.0414533	-0.00234527	0.0052513	-0.0337731	-0.0101961	-0.0321605	0.0164014	0.00758658	0.0146191	-0.00700404	0.0145173	-0.00293188	-0.0459795	0.00529978	0.0352409	-0.0340818	-0.0125428	-0.00618829	-0.00926891	0.0069667	0.0258996	0.00576142	-0.0287287	-0.0160618	0.0189107	-0.00092773	-0.0178634	-0.0087101	0.0976159	0.00754374
V429	0.050529	-0.0164278	-0.020273	0.0334001	0.0404387	-0.0097548	-0.0741154	-0.00186117	-0.0257148	-0.00884063	0.0344011	-0.0138413	-0.00479926	0.0143424	0.0214222	-0.00329831	-0.00343868	0.0181586	-0.0116397	-0.0464118	0.0314374	0.011699	-0.0209612	0.0148113	-0.0506638	-0.000593232	0.0117743	0.00435513	-0.0137639	0.00991458	-0.0176979	-0.0429352	-0.000542916	0.0444182	-0.0433621	-0.0022938	-0.00430207	-0.0105685	-0.0209987	0.00587459	0.000496728	-0.0259344	-0.00559284	0.0250212	0.0204832	0.00571457	-0.00380262	0.0933564	0.00706295
V430	0.0509047	-0.0115429	-0.0171159	0.0420297	0.0408791	-0.0117325	-0.0595758	-0.000589495	-0.0267092	0.00142294	0.0275177	-0.0217033	0.0119446	0.0128723	0.0238398	0.0188098	0.000520711	0.0134139	-0.00851628	-0.0432887	0.0420612	0.0117729	-0.0195825	0.0297592	-0.06431	-0.0134062	0.0198101	0.000500921	-0.0257363	0.00132455	-0.0286335	-0.0380205	0.00269624	0.0500206	-0.0465382	-0.00186414	0.00278788	-0.0102342	-0.0341006	-0.00488771	-0.00142	-0.0119458	-0.00115912	0.0134249	0.0308833	0.00396143	-0.00595176	0.108504	0.00823271
V431	0.0513227	-0.0086112	-0.0147427	0.0482678	0.0406167	-0.012563	-0.0400988	0.0079451	-0.0208462	0.00346388	0.0148386	-0.0193078	0.0224625	0.00790168	0.0305054	0.0264203	0.00891168	0.000193758	-0.00933028	-0.0495883	0.0398567	0.0178011	-0.00891236	0.0306401	-0.0692767	-0.0248732	0.026771	0.00445932	-0.0372475	-0.00955498	-0.036817	-0.029257	0.00200685	0.0433518	-0.0435106	-0.00162838	0.0201555	-0.016969	-0.0289262	-0.00283249	-0.0137061	-0.000255851	-0.0238455	-0.00139487	0.0192224	0.0145488	-0.0284968	0.0860302	0.0130253
V432	0.0515333	-0.0065217	-0.0127627	0.0559671	0.038229	-0.00835668	-0.0209325	0.0131704	-0.0132726	0.00843326	0.00493677	-0.0127014	0.0294991	-0.0034705	0.033747	0.0274208	0.0145976	0.000617211	-0.0136518	-0.0489499	0.0311571	0.0104078	-0.0145952	0.0168378	-0.064196	-0.0278694	0.0217343	0.00534413	-0.0410137	-0.0124384	-0.0502943	-0.00936933	0.00775865	0.0423551	-0.0319434	0.00471819	0.0253406	-0.0275989	-0.0185533	0.00697849	-0.0271174	0.0193951	-0.0332887	-0.0103281	0.00875612	0.0227738	-0.0520143	0.0634997	0.00190947
V433	0.0512297	-0.00833677	-0.0103299	0.0651879	0.0319149	-0.0101745	-0.00617645	0.0188007	-0.00237212	0.0110977	-0.00354637	-0.00520664	0.0403997	-0.00783046	0.0388382	0.0322613	0.0185073	0.00444084	-0.00382297	-0.0409014	0.0145227	-0.00383916	-0.0153707	0.0118211	-0.0487202	-0.031182	0.0273865	-0.0136717	-0.0495228	-0.0196041	-0.0546167	0.0107876	0.00191218	0.0452477	-0.00864591	0.0160518	0.0320444	-0.0270343	-0.00387245	0.00927869	-0.0329303	0.0105253	-0.0480838	-0.00443331	0.00818235	0.00888158	-0.0640559	0.0386663	-0.0149139
V434	0.0501898	-0.0113485	-0.00689643	0.0712561	0.0357178	-0.0106559	0.00900363	0.0234586	0.00841876	0.00613548	-0.0150618	0.00259819	0.0318774	-0.00622493	0.0516031	0.0239092	0.018121	0.00519032	0.00181025	-0.0197032	-0.0010684	-0.0117102	-0.00113363	-0.000251919	-0.0299262	-0.0374041	0.0263267	-0.025224	-0.0504679	-0.0253562	-0.0633975	0.0297578	0.00746713	0.0465304	0.029321	0.0362668	0.0237291	-0.0376716	0.030269	0.00572851	-0.0288725	-0.00345646	-0.0486355	-0.0125441	0.0104201	-0.0108135	-0.08454	0.0215242	-0.0172048
V435	0.0482814	-0.016761	-0.00223418	0.0780451	0.0397138	-0.0142294	0.0151137	0.0270136	0.0220406	0.00651817	-0.0381938	0.0277477	0.0186562	0.00956168	0.0666659	0.0123863	0.0165092	-0.000697966	0.00277928	-0.00181084	-0.00102029	-0.0212866	0.00258962	0.00521592	-0.0091713	-0.0161545	0.019413	-0.0403394	-0.0338081	-0.0189258	-0.0571773	0.0456705	0.0470392	0.0480679	0.0594142	0.0461632	0.0267428	-0.0564452	0.0521849	0.00548046	-0.0401071	-0.00705737	-0.0377293	0.00181661	0.00473226	-0.0128218	-0.0812672	0.0100235	-0.0272626
V436	0.0451158	-0.0234788	0.00631992	0.0803438	0.0503942	-0.0224792	0.0126451	0.0238688	0.0399104	-0.0082023	-0.0310497	0.0490396	0.00465256	0.0100665	0.0816846	-0.0162626	-0.00529522	-0.0214411	0.0209669	0.0278784	0.0174413	-0.0238142	-0.000461547	-0.0188058	0.0260752	-0.0203033	0.0299863	-0.0550939	-0.0241286	-0.000688524	-0.0449265	0.0539322	0.0614306	0.0551815	0.0981422	0.0505295	0.005161	-0.0790327	0.0572391	0.0148919	-0.0451441	-0.0288891	-0.00949348	0.00703376	0.00784783	-0.042756	-0.0347005	0.00657342	-0.0316159
V437	0.0416231	-0.0307677	0.0192353	0.0677831	0.0699312	-0.0295869	-0.00996647	0.000149482	0.0420232	-0.00449797	-0.0233452	0.0423947	-0.0196723	0.0273821	0.0771476	-0.0363247	-0.0320793	-0.0468912	0.0488741	0.0515386	0.0421824	-0.00633571	0.0138547	-0.0362575	0.0870524	-0.00787585	0.0668298	-0.0632485	-0.0250482	0.0214492	-0.0324808	0.0597882	0.0678373	0.0343387	0.105127	0.0452451	-0.00943661	-0.0705998	0.0523892	0.0213142	-0.0545434	-0.0597363	0.00177666	0.000142545	0.0297503	-0.0540347	-0.0216758	-0.0158139	-0.0444084
V438	0.037873	-0.036014	0.0320885	0.0445202	0.0866478	-0.0140107	-0.0400785	-0.024968	0.0328509	-0.00973659	-0.0103447	0.0154998	-0.0381073	0.0412791	0.049348	-0.0329206	-0.0815367	-0.066476	0.0534067	0.0434621	0.0359274	0.0209787	0.0143811	-0.0731245	0.122223	0.00690538	0.109552	-0.0439715	-0.00537397	0.0216874	-0.0216386	0.0329338	0.036796	0.0250939	0.108368	0.0312168	-0.0531964	-0.0596787	0.0187611	0.0142947	-0.0628346	-0.0645391	-0.00217499	-0.0144222	0.0461173	-0.0699715	-0.021796	0.00819353	-0.0507298
V439	0.0370291	-0.0382237	0.0373857	0.0182187	0.0915224	0.00630637	-0.0653358	-0.026428	0.0236462	0.00280086	0.002479	-0.0261328	-0.0484488	0.0100383	0.0178432	-0.0124312	-0.0929906	-0.0721064	0.0413167	0.0520644	0.0343495	0.027571	-0.004248	-0.0802488	0.102854	0.00344207	0.141966	0.000561067	-0.022518	0.0259119	-0.018926	0.0220059	-0.00632318	0.0180718	0.0945011	-0.000279283	-0.0440687	-0.0442448	-0.0295255	-0.0211692	-0.0384229	-0.0559454	0.00253249	-0.0214157	0.0499462	-0.056377	0.0118276	0.0381624	-0.0163034
V440	0.0366543	-0.0360236	0.0376889	0.00866454	0.0986245	0.0320205	-0.0672392	-0.0020214	0.00644077	0.0100285	-0.0167951	-0.0538164	-0.0386265	0.012199	0.00300486	-0.0130316	-0.125428	-0.0853787	0.00308302	0.0299254	-0.00390249	0.0283657	-0.0166441	-0.0928705	0.0670751	0.0288464	0.122503	0.0254992	-0.0194049	-0.0104237	-0.0160829	-0.014433	-0.0133101	0.0192457	0.0738255	-0.0389551	-0.0340477	0.0162601	-0.0358878	-0.0804844	-0.0241623	-0.0209667	-0.0139231	-0.020996	0.0451532	-0.0314379	-0.010516	0.0547344	-0.0080003
V441	0.0391249	-0.0332039	0.0344159	0.00990203	0.100421	0.0391583	-0.0358457	0.0144445	-0.015447	0.0244033	-0.0334193	-0.05916	-0.0225284	-0.0119247	-0.0122112	-0.0126268	-0.106593	-0.0749506	-0.00160856	0.00853731	-0.0413663	0.00751873	-0.0317482	-0.108107	0.0233379	0.0185363	0.100709	0.0536477	-0.0446385	-0.0213627	-0.0162352	-0.0386216	-0.0324744	0.0306677	0.0317886	-0.0586786	0.00916213	0.078961	-0.0508875	-0.0908539	-0.0305781	0.0092398	-0.00823891	-0.0166655	0.0209473	-0.00666786	-0.0374598	0.0233116	0.00936079
V442	0.0420523	-0.0333592	0.027508	0.0173976	0.0948978	0.0288707	-0.0203844	0.0193651	-0.0165895	0.0347489	-0.0469888	-0.0340903	-0.0240435	-0.0182149	-0.00377916	-0.0180489	-0.072795	-0.0409586	-0.00628832	-0.002687	-0.0580053	-0.0046008	-0.0150816	-0.0821558	-0.0267454	0.00456775	0.075922	0.0380425	-0.0660645	-0.0447109	-0.0127875	-0.0734881	-0.037993	0.0269265	0.0288272	-0.0764399	0.023878	0.0793841	-0.0333335	-0.104099	-0.0269951	0.00317262	0.012265	0.0114365	-0.0262951	0.0191945	-0.0430357	0.00117484	0.039676
V443	0.0421186	-0.0370892	0.0224496	0.0406521	0.0888844	0.0139897	0.00955022	0.0289521	-0.013239	0.0392844	-0.0578972	-0.0150857	-0.0184011	-0.019	0.00140385	-0.0230519	-0.0573448	-0.0186381	-0.0107205	-0.00141143	-0.0524232	-0.0281886	0.0048234	-0.0473125	-0.0421146	-0.022113	0.0632836	0.037129	-0.0755528	-0.0574917	-0.0363666	-0.0648211	-0.0491955	0.0223418	0.0118755	-0.0522109	0.00511363	0.0871847	-0.0135456	-0.111482	0.0146416	0.0113948	0.00202779	-0.00478034	-0.0435139	0.0126087	-0.033138	0.00590228	0.0420492
V444	0.0416762	-0.0380787	0.0226616	0.0558585	0.0808843	0.00462	0.0255277	0.0230676	-0.000358373	0.0536733	-0.057019	0.00653583	-0.0120716	-0.0356987	0.00627338	-0.0267516	-0.0307359	0.018721	-0.0251612	-0.00216678	-0.0281297	-0.0366204	0.0355602	-0.0034381	-0.0753219	-0.0507115	0.0510848	0.0181438	-0.0792571	-0.0613765	-0.0480103	-0.0559183	-0.0328075	0.0188868	-0.000409215	-0.0529118	-0.00502788	0.0607081	-0.00940441	-0.0640798	0.0226439	0.0504163	-0.00685786	0.00559597	-0.0346892	0.0347645	-0.0254564	0.0151867	0.0831506
V445	0.041534	-0.0376678	0.0307334	0.059364	0.0791798	-0.00667633	0.039055	0.00583978	0.00846166	0.0483062	-0.0519842	0.025723	-0.0104196	-0.034865	0.0223132	-0.0103824	-0.0309931	0.048219	-0.038625	-0.0157069	-0.0391012	-0.0248119	0.0483347	0.0160394	-0.0777874	-0.0479851	0.0350341	-0.0151155	-0.0450617	-0.0475015	-0.037863	-0.0433092	-0.00818111	-0.0161448	-0.0078576	-0.0197133	-0.0104495	0.00796092	-0.0239296	-0.0525855	0.0315035	0.0424278	0.0266321	0.0066139	-0.0352129	0.0396508	-0.0172352	0.018567	0.0692395
V446	0.0404764	-0.0406147	0.0379476	0.0586085	0.0711885	-0.0125662	0.0412495	0.00618823	0.0160292	0.0220824	-0.0384472	0.0370119	-0.0155009	-0.0208033	0.0084523	-0.00102647	-0.021945	0.0568522	-0.0503069	-0.0136403	-0.0300027	0.017505	0.0600168	0.0251958	-0.0382015	-0.035549	0.0085117	-0.0518264	-0.011756	-0.0407164	-0.0424542	-0.0410204	-0.00222698	-0.0348995	-0.0179604	-0.00703772	-0.0238605	-0.055161	-0.058059	-0.00676233	0.0544826	0.0495698	0.0390939	-0.00737139	-0.0287548	0.0243303	0.0274858	0.0337858	0.0686625
V447	0.0362158	-0.0454088	0.0486385	0.0549769	0.0851125	-0.00599215	0.0349143	-0.0117018	0.0145008	0.0173908	-0.0296977	0.00334137	-0.0144133	-0.00533722	-0.0363253	0.0275993	0.00586171	0.0536218	-0.0480811	-0.00316308	-0.0198381	0.0376507	0.0664923	-0.0135005	0.0179006	-0.0389622	0.0142535	-0.0461297	0.0407286	-0.0277093	-0.0425115	-0.021991	0.0338348	-0.0708904	0.00504472	0.0183488	-0.0454037	-0.0847345	-0.0741203	0.0347354	0.0520705	0.0574691	0.00128875	-0.0384712	-0.00991751	0.00779425	0.0512154	0.0466472	0.0152382
V448	0.0323425	-0.04572	0.0600286	0.0320909	0.0859769	0.0046987	0.0148526	-0.0176536	0.00775053	0.0111428	0.00855733	-0.0313125	-0.0464148	-0.0347946	-0.0697782	0.0274471	0.0131627	0.0288251	-0.0410783	0.0323302	-0.0260405	0.0486284	0.0384978	-0.0970585	0.0769817	0.00345474	-0.00748584	-0.0548709	0.0781065	-0.00950545	0.00987156	-0.0330413	0.0435229	-0.0808059	0.0148401	0.0100675	-0.0589521	-0.138713	-0.0438712	0.0885992	0.0324744	0.0540924	-0.0321454	-0.0424522	-0.00395984	-0.00578123	0.0293375	0.0562425	0.0425746
V449	0.0297964	-0.0441525	0.0600156	0.0078198	0.0837742	0.0277919	0.00407844	-0.0134603	-0.00185099	0.00212216	0.0167064	-0.07877	-0.0705399	-0.027281	-0.0928866	0.00481152	-0.0183376	0.0289029	-0.032265	0.0493219	-0.0176594	0.0445319	-0.0104752	-0.152417	0.110838	0.0351573	-0.0264965	-0.0261132	0.08815	0.0051485	0.0565471	-0.0296811	0.0387693	-0.0558946	0.0242888	0.0126239	-0.0353782	-0.121792	-0.00650736	0.101443	-0.0135584	0.0700555	-0.0586363	-0.0546936	-0.0294934	-0.00510484	0.00822344	0.0177275	0.0401856
V450	0.0302138	-0.0432163	0.0615077	-0.0103998	0.0743019	0.040014	-0.015756	-0.00552007	-0.0194742	-0.0172035	0.0173168	-0.101266	-0.072299	-0.013543	-0.0823642	-0.00612303	-0.0178144	0.0480532	0.00179959	0.0970319	-0.0114253	0.0222365	-0.0490738	-0.134195	0.106717	0.0521831	-0.0364327	-0.037538	0.0978546	-0.00707318	0.0731577	-0.0457212	0.0504489	-0.0238145	0.0431528	0.00750815	-0.00590784	-0.0736614	0.0215358	0.0386627	-0.0237129	0.0312636	-0.0375521	-0.0390645	-0.042443	-0.0375401	0.0119041	0.00671125	0.0194439
V451	0.0300467	-0.0468369	0.0628204	-0.0294711	0.0656883	0.0458856	-0.0284025	-0.00528212	-0.0295181	-0.0394549	-0.0221292	-0.0873377	-0.0543334	0.0224187	-0.0762423	-0.0271543	-0.0276959	0.040045	0.0131767	0.0978322	0.0146976	0.0248651	-0.0604032	-0.0862085	0.0534755	0.0266152	-0.0427163	-0.0280713	0.105038	-0.0564953	0.0831422	-0.0156323	0.0319332	-0.00447486	0.0743759	0.0478247	0.0321753	-0.0543299	0.0375338	-0.0275356	0.0025457	0.00866228	-0.0307457	-0.0464429	-0.0857422	-0.0205589	-0.0119694	-0.0346781	0.0662254
V452	0.0284633	-0.0481051	0.0688026	-0.0398543	0.0654488	0.0429415	-0.0223217	-0.0113837	-0.0350539	-0.0353205	-0.0566587	-0.0512225	-0.0387954	0.0362956	-0.0553753	-0.0361647	-0.0248667	0.0421171	0.0114366	0.0969783	0.022039	0.01335	-0.0706031	-0.00789857	-0.000941489	0.0146025	-0.0580097	-0.0149333	0.0925583	-0.0570003	0.046466	0.0313363	0.05085	0.0013715	0.0939028	0.0769808	0.0346717	-0.0404852	0.050239	-0.0609619	-0.00998738	-0.0057659	0.0152633	-0.0491847	-0.107047	0.0223632	-0.00934369	-0.0487312	0.0721605
V453	0.0290754	-0.0483012	0.0767923	-0.0350543	0.0628638	0.0310047	-0.0205639	-0.0148415	-0.0210859	-0.0387608	-0.0593683	-0.0122574	-0.0189857	0.0429824	-0.00854998	-0.027594	0.00608675	0.0167882	0.00338656	0.0787186	0.0320828	-0.000519641	-0.0715951	0.0773245	-0.00363424	-0.00777355	-0.0454389	-0.0298676	0.065155	-0.0654799	0.0411259	0.0676798	0.010408	0.0379688	0.0965982	0.0450728	0.0295675	0.00271234	-0.00326829	-0.0656329	-0.0463729	-0.00291154	0.00196803	-0.015454	-0.112546	0.0492545	0.000194361	-0.0460868	0.100391
V454	0.0283705	-0.0475803	0.0830808	-0.0247645	0.0540658	0.0279408	-0.0141705	-0.01706	-0.00394027	-0.0508245	-0.0576701	0.00711677	0.00568783	0.0438026	0.0398515	-0.000363495	0.0259416	0.00730918	-0.0160204	0.0565189	0.0134027	0.0301891	-0.0171617	0.117822	-0.00877145	-0.055499	-0.0137932	-0.0534944	-0.00419926	-0.0365487	-0.00038434	0.102729	-0.0254291	0.00878345	0.0797565	0.0236505	-0.0101396	0.000469802	-0.0315467	-0.0818368	-0.049578	-0.0172754	0.0112151	-0.017228	-0.0920297	0.0691391	-0.00942268	-0.0192939	0.0967758
V455	0.0272244	-0.0481157	0.0839466	-0.0235163	0.0354073	0.0303238	-0.0146264	-0.00328644	0.026222	-0.0480583	-0.0697798	0.00710983	0.030081	0.0345813	0.0599435	0.0674672	0.048397	0.00660546	-0.0405824	-0.00620453	-0.0183344	0.0499882	0.00335643	0.129919	-0.0190084	-0.0468245	0.00535036	-0.0400067	-0.0296092	0.00515839	-0.0103668	0.116685	-0.00363918	-0.0159488	0.0389758	-0.0287803	-0.0251154	0.00433474	-0.0485342	-0.0652686	-0.0237855	-0.0106388	0.00950091	-0.00221559	-0.0500931	0.119774	-0.00191656	-0.00530107	0.0873446
V456	0.0251678	-0.0461375	0.0879282	-0.0270225	0.0228951	0.0319434	-0.0180723	0.0295954	0.0616669	-0.0575882	-0.0524079	-0.0122064	0.0395165	0.00778025	0.0724611	0.0923738	0.0475257	-0.00958602	-0.0789773	-0.0433848	-0.0347153	0.0631774	-0.008568	0.102257	-0.0125494	-0.042856	0.0151939	-0.0031855	-0.0582308	0.0283615	-0.0394367	0.0743012	0.00599493	-0.0227292	0.0102648	-0.0514578	-0.047465	-0.00959645	-0.0376218	-0.0529207	0.00161198	0.0370712	0.00458997	0.00165551	-0.0114218	0.105918	0.016813	0.00944448	0.066918
V457	0.0228316	-0.0466517	0.0888749	-0.0258588	0.0280142	0.0284842	-0.0271389	0.058679	0.0744199	-0.0513106	-0.0293919	-0.031074	0.0549011	-0.00590114	0.0697165	0.0939484	0.011779	-0.0335874	-0.0712959	-0.0834018	-0.0257186	0.056918	0.0156621	0.0596908	0.0121643	-0.0203692	-0.000581439	0.0411705	-0.0556044	0.048249	-0.0721204	0.0325368	0.0393641	-0.0253849	-0.0142959	-0.0524554	-0.0475296	0.00534308	-0.0164344	-0.0299823	0.0339015	0.057697	-0.0312102	0.00959461	0.0303696	0.105488	0.0159272	-0.0322958	0.0250555
V458	0.0219218	-0.0515422	0.085143	-0.0263855	0.0340038	0.0114443	-0.0371814	0.0663971	0.0722749	-0.0296135	-0.0134472	-0.0361443	0.08466	0.00162289	0.0373577	0.0788045	-0.0636588	-0.0431623	-0.0377224	-0.113375	-0.0171454	0.053356	0.0352168	-0.00723902	0.0426709	-0.0174128	-0.0363761	0.057045	-0.0339703	0.0381468	-0.0751104	-0.0198006	0.064358	-0.0361007	-0.0190694	-0.0389466	-0.0632055	-0.00183073	0.0111594	-0.0248799	0.0461188	0.0322586	-0.0638854	0.0132874	0.0168361	0.0800279	0.0164243	-0.0490177	-0.0198255
V459	0.0234323	-0.056329	0.0785848	-0.0243072	0.0310015	-0.0076498	-0.0437578	0.0573482	0.0694562	-0.0071262	0.0096742	-0.0471742	0.0847168	-0.0212598	0.022762	0.0309253	-0.0865545	-0.0227183	0.0269223	-0.0999908	-0.0161881	0.038047	0.019631	-0.0522906	0.0612143	-0.0430474	-0.0542125	0.0662301	-0.035552	0.0214594	-0.0512411	-0.0744582	0.0480648	-0.0208426	-0.0297468	-0.0485923	-0.0626807	-0.0306755	0.0495366	0.00502792	0.0377231	-0.0533333	-0.0460795	0.0389212	-0.00194787	0.0490776	0.0194881	-0.0839593	-0.0123097
V460	0.0222275	-0.0542119	0.0787051	-0.0244653	0.0284772	-0.0221112	-0.0591259	0.0547162	0.0461852	0.0127515	0.0230298	-0.070295	0.0802592	-0.0278146	0.0273219	-0.0152267	-0.123315	-0.0134646	0.0600691	-0.0583838	-0.00111589	0.0113423	0.0210184	-0.0576732	0.0653397	-0.0377879	-0.0631088	0.067513	-0.0191152	-0.000491101	-0.0300574	-0.0770995	0.0414479	-0.0093347	-0.0036859	-0.042981	-0.0674613	-0.0346155	0.0702126	0.0136138	0.0348112	-0.0930334	-0.0205872	0.0357695	-0.0186359	-0.00501287	-0.00321024	-0.0545889	-0.049489
V461	0.0230432	-0.054473	0.0775514	-0.030761	0.0218521	-0.0238315	-0.054125	0.0396617	0.0433424	0.0505908	0.0262809	-0.0479121	0.0798116	-0.057923	0.00381015	-0.0423851	-0.135125	0.0120242	0.0700644	-0.0384361	-0.020658	-0.0128532	-0.0115295	-0.0315084	0.051973	-0.0273835	-0.0656569	0.076682	-0.0288065	-0.0314147	-0.00508767	-0.0613535	0.0282751	-0.00957327	0.00676403	-0.0196138	-0.0183389	-0.0455002	0.0605771	0.00835429	0.0322478	-0.110594	0.00952849	0.0361812	-0.0538649	-0.0112075	0.0074431	-0.00186869	-0.0480822
V462	0.0253806	-0.0543494	0.0764678	-0.038224	0.0105949	-0.0189612	-0.0474047	0.010127	0.0328319	0.0642335	0.0256167	-0.0293764	0.0824565	-0.0762394	-0.00471869	-0.0416918	-0.0965125	0.0280289	0.0638888	-0.0323996	-0.0590696	-0.0391106	-0.0298846	0.00495439	0.0330734	-0.00992914	-0.0568753	0.0379033	-0.0105176	-0.0389546	0.00731083	-0.0386354	0.0200339	-0.0584618	0.0369017	-0.00373273	0.0479012	-0.0546054	0.00455244	0.00965015	-0.0198103	-0.116561	0.0568318	0.0386586	-0.0558541	-0.0156058	-0.0169316	0.0422383	-0.0137944
V463	0.0247082	-0.0549283	0.0814187	-0.0421426	0.00793873	-0.0206101	-0.0217012	-0.0108025	0.0247672	0.0607496	0.0176555	-0.0192814	0.0873084	-0.0760764	-0.0344513	-0.0173253	-0.0473252	0.000536022	0.0619453	-0.0269034	-0.0733925	-0.0461143	-0.0462247	0.035403	0.0230964	0.0267243	-0.0555498	-0.00667673	0.00254335	-0.0340863	0.0309965	-0.0161328	0.03074	-0.104453	0.0326125	0.0206678	0.0630525	-0.0417051	-0.0169498	0.00236416	-0.0513712	-0.0741115	0.0697084	0.013331	-0.0570922	-0.00632907	-0.00716372	0.112381	-0.0349688
V464	0.0228482	-0.0563501	0.0787844	-0.0432581	0.00224696	-0.0189541	-0.00977839	-0.0307691	0.0270043	0.0670586	0.000276536	0.00939716	0.0761108	-0.0990877	-0.0650922	0.0216798	0.0194788	-0.00520738	0.0344791	0.0159114	-0.0821365	-0.0687912	-0.0464502	0.0483075	0.00672528	0.0675033	-0.0230605	-0.045238	0.0134289	-0.0399412	0.0431683	-0.0252195	0.0261078	-0.127447	0.0131564	0.0148268	0.0555908	-0.0276939	-0.0387027	-0.00909797	-0.0667063	-0.0152888	0.074056	0.00538764	-0.0105035	0.000719918	0.00826037	0.15837	0.0118026
V465	0.02157	-0.0559233	0.0758391	-0.0502097	0.00954365	-0.0190661	-0.00388266	-0.0421307	0.029843	0.0620929	-0.00799446	0.00317618	0.0439332	-0.0992018	-0.0794697	0.0557461	0.0707554	-0.00440245	-0.00143627	0.034974	-0.0754411	-0.0908605	-0.0380274	0.0426645	-0.0251937	0.0702211	0.0144835	-0.060512	0.0234556	-0.0314685	0.037672	-0.0272264	0.0374218	-0.118995	-0.00565395	0.010818	0.0318882	-0.000642404	-0.044077	-0.0278532	-0.0802916	0.0412878	0.074684	0.0158569	0.00609022	0.0490082	0.0113438	0.167921	0.0703281
V466	0.023419	-0.0562196	0.0718404	-0.0676179	0.00782125	-0.0120123	-0.00910169	-0.0298322	0.0194046	0.0238717	0.00262398	-0.00982911	-0.00866216	-0.0687665	-0.080003	0.0717737	0.0876819	-0.00453866	-0.0295512	0.0302733	-0.0367481	-0.0833413	-0.0208059	0.00967166	-0.0400184	0.0848571	0.0502448	-0.0526754	-0.00294011	-0.0206541	0.0662988	-0.0616957	0.0542759	-0.0952476	-0.0283602	-0.00606687	0.0165789	0.0163791	-0.0561973	-0.0319971	-0.0410143	0.0820667	0.0656982	0.000700973	0.000952368	0.0513087	0.0254592	0.151336	0.111754
V467	0.025576	-0.0596695	0.0667746	-0.076351	0.0348688	-0.00712526	-0.0365368	-0.00548311	0.0283255	-0.0208575	-0.000409487	-0.0184812	-0.0511003	-0.0284281	-0.0423746	0.0706415	0.0801738	-0.00847968	-0.0258023	0.0311378	-0.00169057	-0.0484418	0.00230732	-0.0189578	-0.0376957	0.0368407	0.092199	-0.0144226	0.00618375	-0.0106612	0.0514842	-0.0690816	0.0533997	-0.0526111	-0.0535264	0.0213793	0.00887395	0.0492272	-0.0440313	-0.0190379	0.00279909	0.0844754	0.0205816	-0.0145785	0.00668973	0.0613831	0.050367	0.0861439	0.0824508
V468	0.0273509	-0.055165	0.058516	-0.0761673	0.0506363	-0.0086094	-0.0663691	0.00734095	0.0158404	-0.0692579	0.00529197	-0.0117253	-0.0870102	-0.00821019	-0.0226897	0.0519728	0.0517123	-0.0162791	-0.0176214	-0.00241869	0.027981	-0.0192655	0.0324568	-0.0384566	-0.0262978	-0.00358346	0.107826	0.0320675	-0.016421	-0.00165477	0.0413622	-0.0738295	0.0446017	-0.029766	-0.0640789	0.0538656	-0.0142438	0.036784	-0.0259866	0.00725044	0.0122705	0.0449695	0.00421491	0.0280827	-0.0147241	0.0127639	0.0605279	0.0246223	0.0805324
V469	0.0303907	-0.0545428	0.0472842	-0.0630068	0.0571141	0.0011391	-0.0900353	0.009364	0.0169247	-0.0815099	-0.0214073	-0.00654421	-0.0726341	0.0266327	-0.00405951	0.0136327	0.00301457	-0.0104776	0.00125222	-0.045218	0.0321751	-0.000535703	0.0475371	-0.0299648	-0.0275227	-0.00270999	0.100508	0.0556706	-0.0106121	0.00573861	0.0310633	-0.0319338	0.0427516	0.00935674	-0.0399088	0.116752	-0.021366	0.039801	-0.0429324	0.0128217	0.010528	0.0140873	-0.0212338	0.0181256	-0.0610213	0.000235846	0.013885	-0.0136515	0.0474286
V470	0.0351	-0.0464383	0.0456239	-0.0393993	0.0629221	0.00576166	-0.0895935	0.00539873	0.008108	-0.0704006	-0.0353425	-0.00173335	-0.0613014	0.049926	0.0408471	0.00416741	-0.0152441	-0.00608376	0.0276264	-0.0463848	0.0401379	0.0123019	0.0765676	-0.00766609	-0.00379222	-0.00590699	0.079516	0.0513207	0.0187706	0.0425331	0.0168325	-0.0130494	0.0447248	0.0329149	-0.0381035	0.101523	-0.0194876	0.063861	-0.0850379	0.00250081	-0.00307789	-0.0222805	-0.0400438	0.0359281	-0.0736997	-0.026672	0.00150275	-0.0228716	-0.000151596
V471	0.038454	-0.0436049	0.0405127	-0.0250467	0.0620228	-0.000729429	-0.0975553	0.00412184	0.000400484	-0.0576769	-0.0274365	0.0024296	-0.0456426	0.0442098	0.0526583	-0.0176032	-0.0103508	-0.00219407	0.028652	-0.0392167	0.0430252	0.0408074	0.0563738	0.0189579	0.00880152	-0.0039335	0.0509236	0.0327167	0.0222982	0.0886789	0.00630434	0.00384806	0.0216058	0.044371	-0.0295707	0.0851772	-0.00585446	0.0531734	-0.0954088	0.0018255	-0.0156369	-0.0336398	-0.0673607	0.0450798	-0.0458062	-0.0222844	-0.0417072	-0.00329296	-0.00264053
V472	0.0415857	-0.0403381	0.0359701	-0.0201654	0.0449848	-0.00731945	-0.0973665	-0.00690144	0.00261267	-0.0497278	-0.0326553	-0.00910414	-0.0189352	0.0278491	0.0535733	-0.0145714	-0.00662899	0.0024384	0.0448496	-0.0436255	0.0390939	0.0430255	0.0236927	0.0318687	0.00575338	0.0160224	0.0206293	0.0152063	0.0380219	0.110028	-0.0214547	0.0113637	0.0288616	0.0338864	-0.019277	0.0941631	0.0213901	0.0292066	-0.113164	-0.00844233	-0.0235284	-0.0195092	-0.0573466	0.0416918	-0.0161362	-0.0100863	-0.0649716	0.0124616	-0.0141516
V473	0.043604	-0.0376735	0.0283591	-0.0183978	0.0326918	-0.00577137	-0.101488	-0.0109107	-0.0039233	-0.0398102	-0.0311075	-0.0203387	-0.0106818	-0.00908337	0.0459736	-0.0160688	0.0173929	0.0044487	0.0464745	-0.0483717	0.0296675	0.0134966	-0.0116477	0.0445711	0.0240676	0.035204	-0.00150417	-0.0057089	0.0552094	0.116833	-0.0240201	-0.00984793	0.014828	0.0301232	-0.0120482	0.0654114	0.0514575	0.0312854	-0.106233	0.0150773	-0.0204611	-0.0058219	-0.058408	0.0295018	0.00470084	-0.00273444	-0.0754273	-0.00289925	0.00698486
V474	0.0459549	-0.0338606	0.019363	-0.0149919	0.0162436	-0.00770644	-0.0916411	-0.0187567	-0.0213036	-0.0329443	-0.0224637	-0.0254201	0.00109328	-0.0362133	0.0338294	-0.0095061	0.0247829	0.0178563	0.0353734	-0.0255515	0.0220361	-0.00415354	-0.0113235	0.0768852	0.042721	0.0197529	-0.0319289	-0.0145759	0.0549651	0.10791	-0.0374387	-0.0265015	-0.00687939	0.0121061	-0.0171552	0.0415109	0.0607421	0.0156957	-0.0931273	0.00352336	-0.0265622	-0.00145805	-0.0428649	0.0361431	0.00863292	0.00590217	-0.0908068	0.00114532	0.0229335
V475	0.0476964	-0.0302494	0.00789857	-0.0133375	0.0133874	-0.0128717	-0.089153	-0.0223036	-0.0236453	-0.0169038	-0.011429	-0.0273326	0.0166059	-0.0400107	0.0138969	0.00961887	0.0185119	0.031797	0.0319102	-0.0229453	0.0278794	-0.0151595	-0.00821655	0.0737425	0.0377981	-0.00558126	-0.0425838	-0.0160882	0.0408595	0.0957875	-0.0422924	-0.0311459	-0.0189675	-0.000946207	-0.0269711	0.0421491	0.0536467	-0.00568866	-0.0820481	0.0143327	-0.0161588	-0.0217344	-0.0342659	0.0314687	0.000959967	0.00804831	-0.0626341	-0.00332863	0.0396228
V476	0.0496248	-0.0258678	-0.00111969	-0.011844	0.011001	-0.019335	-0.0841863	-0.0214311	-0.0209392	-0.00821688	0.00112742	-0.032686	0.0242856	-0.0307559	-0.000593909	0.0208439	0.0177489	0.0364075	0.0301659	-0.0137993	0.0166047	-0.0103943	-0.00751262	0.0666169	0.0363327	-0.0289368	-0.0183434	-0.0175163	0.0152504	0.0762285	-0.0406898	-0.0310195	-0.0371015	-0.00224897	-0.026631	0.0209953	0.0546394	-0.0201766	-0.0538278	-0.000106131	-0.00545338	-0.0274005	-0.00717714	0.0101036	-0.00585412	0.00720662	-0.0344529	0.0037364	0.0567506
V477	0.0513728	-0.0213855	-0.00795222	-0.00890584	0.0122606	-0.0200907	-0.0729889	-0.0137607	-0.0142464	-0.00682457	0.0199854	-0.043681	0.0213489	-0.0257178	-0.00286766	0.025925	0.00735426	0.0346902	0.0247103	-0.0189063	0.00796504	-0.0108156	-0.00410774	0.0438519	0.0249619	-0.0405877	-0.00277541	-0.00235162	-0.0173225	0.0474146	-0.0488648	-0.0301607	-0.035099	0.0019751	-0.00984037	0.00696604	0.0468282	-0.0196262	-0.0269154	-0.0089238	0.0105414	-0.0356108	0.00385443	-0.0123481	-0.00564333	-0.00235488	-0.023819	0.00766827	0.0614367
V478	0.0520759	-0.0181701	-0.0118362	-0.00256131	0.012953	-0.0252561	-0.0676642	-0.0038126	-0.016791	-0.00483205	0.0314165	-0.0421243	0.0268738	-0.0230863	-0.00328546	0.0225155	-0.0131025	0.0197079	0.0217886	-0.0284134	0.00741491	0.00544207	0.00998289	0.0319475	0.0150663	-0.0324981	0.00947902	0.0253939	-0.0218242	0.0330929	-0.0424499	-0.017876	-0.0262133	-0.00751381	0.000980159	0.0109843	0.0523703	-0.022806	-0.0046099	-0.013791	0.00732348	-0.0364699	0.00107668	-0.0228878	-0.0148321	-0.00707185	-0.0281662	0.0279944	0.0544082
V479	0.0527441	-0.0166788	-0.0137562	0.0076536	0.0139562	-0.0272795	-0.0578489	0.0027641	-0.0106516	-0.00517672	0.0281837	-0.0357551	0.0271875	-0.0139237	-0.00296749	0.0199175	-0.0191899	0.00661216	0.0161708	-0.0403973	0.00198138	0.00763431	0.0166694	0.0252138	0.00365865	-0.016174	0.0190656	0.0282964	-0.013637	0.0224612	-0.0183669	-0.014705	-0.023765	-0.0122928	0.0100893	0.00951765	0.0578562	-0.035301	0.0142035	-0.0112775	0.00186693	-0.0342348	0.00234078	-0.0222569	-0.0071597	-0.00630877	-0.0310261	0.0286999	0.0433602
V480	0.053075	-0.0158018	-0.0123678	0.0165005	0.0168274	-0.0315191	-0.0485553	0.00852928	-0.0145657	-0.00280164	0.0223619	-0.0310921	0.0257067	-0.0023674	-0.00192129	0.0169476	-0.0103727	-0.00839916	0.00864535	-0.0431952	-0.00495773	0.0128893	0.0272587	0.0191044	0.00363812	0.000444198	0.0317427	0.0272999	0.00376606	0.020551	0.00228659	-0.0105808	-0.0230841	-0.0162924	0.0119195	0.00795249	0.0556716	-0.038177	0.0259443	-0.00694771	-0.0182045	-0.0219076	0.00502161	-0.0261123	0.0063464	-0.00257722	-0.0414339	0.0370809	0.0244984
V481	0.053021	-0.0166745	-0.0121084	0.0204095	0.0123276	-0.0411361	-0.0409502	0.00623327	-0.0136595	0.000409723	0.0127314	-0.0246847	0.023961	0.0025734	0.00326776	0.0139545	-0.00487844	-0.0197804	0.00590384	-0.0349104	-0.00129025	0.018097	0.0321861	0.0143437	-0.00511108	0.023253	0.0317058	0.0229626	0.016744	0.00876003	0.0125787	-0.0153543	-0.017512	-0.016507	0.0115495	0.0083338	0.0487068	-0.0361702	0.0333159	-0.0122808	-0.0235559	-0.00766475	0.00712264	-0.0357602	0.00996584	0.0113382	-0.051708	0.0455332	0.000206777
V482	0.0526909	-0.0180242	-0.00894123	0.019565	0.00228313	-0.0478499	-0.036463	0.0109705	-0.0141769	-0.00594322	0.00578746	-0.0270321	0.0256374	-0.0042722	0.0135146	0.00582116	0.00482532	-0.0219232	-0.00787081	-0.0263006	-0.0011987	0.0201956	0.034235	0.0137384	-0.010555	0.0378333	0.0404759	0.0247728	0.0203641	0.00823853	0.00528395	-0.0267066	-0.0247789	-0.0174232	0.0120206	-0.00439467	0.0229709	-0.0204728	0.0334467	-0.0214627	-0.0276468	0.00511848	0.0244425	-0.0479997	0.0203293	0.010939	-0.0678358	0.048642	-0.026867
V483	0.0522324	-0.0204037	-0.00489817	0.01188	-0.00823731	-0.0545087	-0.0400326	0.012502	-0.0210105	-0.0163051	-0.00415034	-0.0275028	0.0159783	0.00196257	0.012136	0.00486226	0.0191691	-0.0327486	-0.0061275	-0.021033	0.0161852	0.0295477	0.0332835	0.00660116	0.00070517	0.036398	0.0226857	0.0184992	0.0103346	0.0194319	0.000449727	-0.0293261	-0.0268803	-0.0147398	0.00264868	0.00346559	0.00785775	-0.00983829	0.0231017	-0.0207821	-0.0304666	0.00327914	0.0286233	-0.0464011	0.0186006	0.0152907	-0.0699337	0.0467011	-0.0457036
V484	0.0510475	-0.0245656	-0.00186104	-0.00189468	-0.0146074	-0.0610616	-0.0503269	0.0143097	-0.0270845	-0.0235137	-0.0161148	-0.0210526	0.000477278	-0.00138719	0.0125142	0.00743794	0.0316643	-0.0292927	0.00126157	-0.0112826	0.0210946	0.0440155	0.0198493	-0.00216153	0.0147314	0.0345171	0.0123665	-0.00298183	-0.00505138	0.0251081	-0.0117574	-0.0385205	-0.0365554	-0.0207547	-0.00192375	0.00337779	-0.009613	0.0118131	0.0274351	-0.0274915	-0.0218177	-0.0142941	0.0318214	-0.0256866	0.0341157	0.00943175	-0.0553495	0.042505	-0.0590809
V485	0.0492804	-0.0300998	0.00439782	-0.0149006	-0.0143774	-0.0646549	-0.054734	0.0161822	-0.0199926	-0.0381174	-0.0294915	-0.0231791	-0.0115879	-0.0179433	0.019376	0.0145195	0.0403528	-0.016989	0.00851903	-0.000396861	0.0222422	0.0397461	0.00545579	-0.00105533	0.0144114	0.0202821	-0.0102065	-0.0153674	-0.0143281	0.041092	-0.0221973	-0.0394612	-0.0334836	-0.0307548	-0.00537471	-0.00341542	-0.0350223	0.0393738	0.0292943	-0.0228823	-0.0224432	-0.03123	0.0561468	0.0183141	0.0263503	0.00622463	-0.00464474	0.0389864	-0.0596206
V486	0.0473877	-0.03548	0.00879224	-0.0284466	-0.0185139	-0.0547717	-0.0576436	0.0138047	-0.0177151	-0.0457471	-0.0530759	-0.0165072	-0.0136788	-0.0144228	0.0119866	0.0223665	0.0388768	0.00302256	0.0229971	0.00628614	0.00762475	0.0484323	0.00184506	-0.00127963	0.00621726	0.0227809	-0.0269376	-0.0188242	-0.0204504	0.059342	-0.0157174	-0.0510188	-0.0253718	-0.0144508	-0.00171022	-0.0265962	-0.0526475	0.0581614	0.0240373	-0.0342587	0.00610223	-0.0433138	0.0774714	0.0465945	0.0147871	-0.00535924	0.0500804	0.0216542	-0.0238092
V487	0.0452903	-0.0391117	0.0178982	-0.041362	-0.0128602	-0.0487785	-0.0614107	0.021297	0.0106709	-0.0379745	-0.0609635	-0.0113821	-0.00325586	-0.0305375	0.0160468	0.0324856	0.0132526	0.0166307	0.0295203	0.0160078	0.0119613	0.0474008	-0.000517414	0.00320904	0.00454972	0.00755003	-0.050163	-0.0363571	-0.0129346	0.0577085	0.00119009	-0.0205903	-0.0171613	0.00461	0.0141202	-0.0351097	-0.0571959	0.0635636	0.0513302	-0.0536139	0.0345493	-0.0513634	0.0644212	0.0585519	0.0047034	0.00605322	0.0804659	-0.0227477	-0.0151192
V488	0.0444082	-0.0407037	0.0219151	-0.0466089	-0.00446379	-0.050447	-0.0595692	0.0187076	0.0215364	-0.0306945	-0.0553865	-0.0132211	-0.00267368	-0.0403579	0.00976214	0.0379503	-0.000102303	0.0135376	0.0346026	0.013121	0.0229343	0.038442	-0.00287232	0.00567446	0.00129826	-0.00471213	-0.0386268	-0.0336047	-0.0135648	0.0464261	0.00481651	-0.00611403	-0.0163449	0.0176437	0.0307553	-0.0532021	-0.0329142	0.0485205	0.068936	-0.0600939	0.0447351	-0.0472285	0.0385202	0.0588212	0.00289113	-0.0018622	0.0955361	-0.0617643	0.0189911
V489	0.0440122	-0.0423023	0.0219369	-0.0449263	-0.0057966	-0.0538875	-0.0646398	0.0136499	0.0365474	-0.0284011	-0.0397545	-0.00863963	0.00163611	-0.0676802	0.0160294	0.0229901	-0.0107039	0.00157409	0.0215026	-0.00331875	0.0193794	0.0176155	-0.013717	0.0055785	0.00181705	0.0122019	-0.0136663	-0.0382714	-0.0112166	0.0131416	0.0103048	-0.00350222	-0.0157506	0.0360907	0.0334553	-0.0646132	-0.0092777	0.0218714	0.0821532	-0.054172	0.0414231	-0.0475681	0.000677878	0.0506248	0.0363141	0.0169524	0.0609813	-0.0737222	0.0392819
V490	0.0444642	-0.04284	0.0203353	-0.0424982	-0.0205007	-0.0481277	-0.0591836	0.00214578	0.0419719	-0.0187465	-0.0277405	-0.0140957	0.00421778	-0.0706597	0.0227326	0.0235965	-0.0230394	-0.00523675	0.00584325	-0.0220763	0.0207056	0.00280461	-0.010325	-0.00460395	0.0183358	0.0219109	-0.00450436	-0.0390833	0.0209174	-0.0101867	0.0230929	0.0156271	-0.00746872	0.0544892	0.0210234	-0.0643769	0.0180591	0.017988	0.0594616	-0.0460454	0.0119379	-0.0379398	-0.00438714	0.0341697	0.0596624	0.0153548	0.020695	-0.103745	0.0469439
V491	0.0451888	-0.04319	0.0165215	-0.0372494	-0.0324851	-0.0448862	-0.0476255	-0.00391171	0.0403675	-0.00293135	-0.016511	-0.0244418	0.0056368	-0.0793279	0.0302443	0.0201405	-0.0229753	0.00310401	-0.01226	-0.0147978	0.0214054	0.00124425	-0.0180659	-0.00292124	0.0307853	0.013257	0.00702155	-0.0341011	0.0220633	-0.0126925	0.023003	0.0299091	-0.0313772	0.0566893	0.0181431	-0.0658464	0.0310038	0.0065274	0.0605032	-0.029872	-0.0213003	-0.0328339	-0.0051006	0.0225383	0.0574394	0.0355829	-0.00170767	-0.109782	0.0249454
V492	0.0466979	-0.0393001	0.0103957	-0.0383638	-0.053459	-0.0477536	-0.0366609	-0.010511	0.0388856	-0.000746168	-0.00376027	-0.0406302	0.0113727	-0.0565626	0.0328261	0.0138693	-0.0196638	0.00737399	-0.0156411	0.000835516	0.0284156	-0.00897652	-0.0218184	-0.00349625	0.0296582	0.00474396	0.0232913	-0.0329051	0.00749376	-0.0297284	0.0202106	0.0376052	-0.0256602	0.0481946	0.00544928	-0.0353638	0.0292982	-0.0139124	0.0280908	-0.0132887	-0.0580367	0.00633228	0.00798451	0.0257685	0.0529519	0.0326832	-0.0119319	-0.0653006	0.00864344
V493	0.047034	-0.0388064	0.00822534	-0.0385076	-0.0589964	-0.0426722	-0.0212526	-0.0141675	0.0410983	0.00149159	-0.0035009	-0.05589	0.00354419	-0.0380732	0.0319445	0.0134927	-0.016052	0.0182724	-0.0220307	-0.00811484	0.0242805	-0.0104195	-0.038825	-0.0263618	0.0177657	0.00272531	0.0332903	-0.0356339	-0.0225888	-0.0205897	0.0183139	0.0318657	-0.0245868	0.031775	0.0028388	-0.0187207	0.00331606	-0.0198382	0.00916389	-0.00937279	-0.0724199	0.0408431	-0.000689315	0.0285154	0.0357374	0.0259426	0.00140997	-0.040317	-0.0260612
V494	0.0465371	-0.0364117	0.00803113	-0.0420279	-0.068677	-0.0457838	0.000189808	-0.0126597	0.0311455	-0.0176883	-0.00154316	-0.0621641	-0.0036062	-0.0309495	0.0305547	0.0182859	-0.0173564	0.0272186	-0.0204393	-0.000142933	0.0223699	-0.00381555	-0.0423025	-0.0453344	0.00934332	-0.00383543	0.0235927	-0.0380106	-0.0506263	-0.0122936	0.0256415	0.0150986	-0.0397867	0.0111539	0.0115176	-0.0237135	-0.0186026	-0.0213031	-0.00726067	-0.0164447	-0.0726205	0.0499582	0.0138827	0.0388779	0.000309361	-0.00978469	0.0138582	-0.0134323	-0.0312993
V495	0.0460021	-0.0355906	0.0076722	-0.0457687	-0.0677537	-0.0464021	0.00848948	-0.0115761	0.0213827	-0.0242745	-0.00752692	-0.0725136	-0.0133872	-0.0336319	0.021966	0.0133766	-0.0219297	0.0318136	-0.0207487	-0.015233	0.0300069	0.0234054	-0.0331441	-0.0515212	0.0106898	-0.0150398	0.00593942	-0.0210433	-0.0607043	-0.00323371	0.0391973	0.0025839	-0.0460789	-0.0128289	-0.00260117	-0.0277719	-0.0341046	-0.0264911	-0.0104661	-0.00620673	-0.0622676	0.0485234	0.012212	0.0509761	-0.0182274	-0.0402752	0.0188743	0.00285814	-0.0474384
V496	0.0461699	-0.0360464	0.00802066	-0.0467078	-0.064274	-0.0551123	0.0122946	-0.0124252	0.0132803	-0.0308968	-0.012838	-0.061605	-0.0177965	-0.0268879	0.0131318	0.0127177	-0.0221167	0.00997399	-0.0188922	-0.0216322	0.031652	0.0402973	-0.0165113	-0.0353383	0.018645	-0.0306495	-0.00177407	-0.00945125	-0.0359389	0.0148377	0.0619841	0.00423034	-0.0518087	-0.0295248	-0.0104299	-0.0167593	0.00433819	-0.0297023	-0.00284291	-0.0107181	-0.060405	0.0367825	0.010197	0.0486107	-0.029146	-0.0334154	0.018125	-0.0065016	-0.0567668
V497	0.0461006	-0.0373519	0.00739024	-0.0540229	-0.0553993	-0.0586102	0.0160658	-0.0106523	0.0124522	-0.0315693	-0.0171398	-0.0458553	-0.0265781	-0.0254494	0.00366139	0.0214214	-0.0262086	0.00125451	-0.0234114	-0.0356239	0.0248078	0.0416948	-0.0141228	-0.0347644	0.0211219	-0.0464216	-0.0096253	-0.0143845	-0.0226913	0.0132129	0.0607975	-0.0107377	-0.0512146	-0.0292063	-0.00697466	-0.0154964	0.025935	-0.0231633	0.01002	-0.0100871	-0.0307963	0.023086	-0.00731408	0.0266558	-0.0315786	-0.0303042	0.0154963	-0.0110849	-0.0543999
V498	0.0461016	-0.0388041	0.00685631	-0.0547658	-0.0507392	-0.0695936	0.0189651	-0.00770398	0.00304118	-0.0301033	-0.0155101	-0.0234993	-0.010621	-0.035693	-0.00442672	0.0182344	-0.0363275	-0.00415489	-0.0159482	-0.0446004	0.0108696	0.0451103	3.0882e-05	-0.00385877	0.0124132	-0.0329189	-0.0111247	0.00358283	-0.0042741	-0.00946313	0.0381532	-0.00434498	-0.0300803	-0.0333523	-0.0133477	0.00283111	0.0599507	-0.00785762	0.0136537	0.0105393	-0.00797219	0.0191705	-0.0315673	-0.00692984	-0.0484539	-0.0231868	-0.0141254	-0.0197245	-0.0377332
V499	0.0454872	-0.0396724	0.00979146	-0.0543718	-0.050089	-0.0761032	0.019672	-0.000109662	-0.00356595	-0.0236609	-0.0158551	-0.0139459	-0.00748493	-0.0428572	-0.00978077	0.0147709	-0.0519352	-0.0126413	-0.00705441	-0.0413198	0.0102175	0.0368943	0.000919019	0.0125994	0.01241	-0.0115294	-0.0117003	0.00518306	0.000206556	-0.0157153	0.0156282	0.00293044	-0.0242748	-0.0288931	-0.00367031	0.0214832	0.0748626	0.00715181	0.0148993	0.0251422	0.00979724	0.0168807	-0.042829	-0.0345725	-0.0725551	-0.0117445	-0.039336	-0.0176564	-0.011452
V500	0.0455352	-0.0389175	0.0124977	-0.0511629	-0.0466933	-0.0815357	0.018594	0.00400796	-0.0056163	-0.00753585	-0.0147394	-0.00993009	0.000839824	-0.0380648	-0.00656745	0.0159186	-0.0420152	-0.0120391	-0.000900729	-0.0352118	0.00646625	0.0223271	-0.00857305	0.0349739	0.019634	0.00898059	-0.00976864	-0.00838377	-6.7295e-05	-0.0155176	-0.00470116	0.0212057	-0.0214892	-0.0147062	-0.013001	0.0339408	0.0819933	0.0185398	0.0106332	0.0377982	0.00483804	0.0197882	-0.0565245	-0.0381672	-0.0848233	-0.00771344	-0.0505028	-0.0101534	0.0050253
V501	0.0454176	-0.0398796	0.00834162	-0.0480156	-0.0524054	-0.0813935	0.0147351	0.00716302	-0.0138013	0.00928268	-0.0219757	-0.00909058	-0.00928918	-0.0210255	-0.00261364	0.0301388	-0.0345514	-0.000931933	0.0116349	-0.025182	0.00096668	0.000109815	-0.0192053	0.0418085	0.0131593	0.0225669	-0.00681681	-0.0268749	0.00605198	-0.0131987	-0.0203766	0.0203464	-0.0124896	0.000336778	-0.011177	0.0453026	0.0776032	0.0369529	-0.00390404	0.0348968	0.00835266	0.0337323	-0.0700934	-0.0307796	-0.0695332	0.00988895	-0.0507088	-0.0139689	0.0172567
V502	0.0460889	-0.0390626	0.00427342	-0.0423205	-0.0563215	-0.0778545	0.00931674	0.0171294	-0.0148254	0.0217528	-0.0169299	-0.0317821	-0.0107909	-0.00814919	0.00909756	0.0264246	-0.0228211	0.0224789	0.0117864	-0.0146613	-0.0182957	-0.0183335	-0.0224154	0.0304855	-0.00969387	0.0387153	0.0176378	-0.0344819	0.00638984	0.00218479	-0.0267252	0.0159687	-0.00527958	0.00246698	-0.0190437	0.0299651	0.0475136	0.0554982	-0.00953902	0.027438	0.029887	0.056657	-0.0661409	-0.0152026	-0.0541911	0.0166555	-0.0410014	0.00071863	0.0107885
V503	0.0461794	-0.0380749	0.00368867	-0.0374925	-0.0579495	-0.0771677	0.00745109	0.0174959	-0.00763157	0.033055	-0.023727	-0.0451218	-0.012401	-0.00202816	0.0417414	0.0221816	-0.00131529	0.0311632	0.0104825	0.00841849	-0.0282687	-0.0178055	-0.0140464	0.0176977	-0.0113523	0.0392417	0.0208634	-0.028492	0.00967123	0.0255701	-0.00666034	0.00865318	-0.00267876	0.00110004	-0.0309652	0.0195793	0.0332021	0.0484755	-0.021817	0.0171435	0.021232	0.0814864	-0.0421196	0.00610428	-0.0500079	0.0107204	-0.0266163	-0.0110318	0.0113674
V504	0.0456678	-0.0383952	0.00261035	-0.0383884	-0.0611836	-0.0771682	0.00320152	0.0111089	-0.00727519	0.0360331	-0.0269571	-0.0494759	-0.00896313	0.00402208	0.0449549	0.0075909	0.0191476	0.0402974	0.0173017	0.0180746	-0.0286436	-0.00776677	-0.0191224	0.00880535	-0.00763785	0.0161301	0.0205948	-0.0380636	0.0091154	0.0349638	0.0121329	0.00730366	-0.00882987	0.00799538	-0.0210149	0.0045645	0.000215147	0.0368945	-0.0160308	0.00139545	0.0164486	0.0991026	-0.039995	0.0210769	-0.049486	0.0178155	-0.0274178	-0.0124492	0.0278682
V505	0.0453476	-0.0391738	0.00249894	-0.0389712	-0.061601	-0.0835887	0.00430656	8.28308e-05	-0.0101597	0.0312531	-0.0205959	-0.0451989	-0.00829258	0.000236511	0.0420341	0.00158081	0.0256937	0.0390047	0.0106977	0.0139586	-0.0123022	-0.00674118	-0.00992599	0.00550779	0.00135371	0.00378695	0.016347	-0.0411932	0.0126203	0.0221436	0.0291052	-0.000786657	-0.00279643	-0.00620955	-0.0208342	-0.0162478	-0.0218924	0.0265245	-0.0242692	-0.0212614	0.00172359	0.0934652	-0.0306801	0.0289894	-0.0603999	0.0128877	-0.0265101	0.00342243	0.0062187
V506	0.0445288	-0.0429798	-0.000695449	-0.0353002	-0.0635765	-0.0888244	0.00326468	-0.0188076	-0.0213988	0.0291299	-0.0210112	-0.0238733	-0.0077392	0.00265214	0.0243501	-0.00670098	0.0250563	0.0305678	0.0129442	0.00433202	0.00761045	0.0131689	-0.000107974	0.00553443	0.0248938	0.00758199	0.0150877	-0.0378146	0.0421066	0.0151738	0.0206243	-0.0133366	-0.0117035	-0.00853802	-0.0163837	-0.0119075	-0.0194534	0.0206496	-0.0415149	-0.0398942	0.0163068	0.0652545	-0.0204727	0.0345978	-0.0218917	0.00535801	-0.0304864	0.00709294	0.0102684
V507	0.0444034	-0.0438243	-0.00102126	-0.0328297	-0.0588737	-0.0966232	0.00952608	-0.0268863	-0.0212966	0.0197522	-0.00657189	-0.00969764	-0.0099447	-0.018896	0.0148934	-0.0192257	0.011371	0.0183012	0.00749152	0.000628244	0.0187211	0.0267612	0.00254913	0.00653115	0.0492825	0.009251	0.0033356	-0.0285359	0.0451287	0.0152171	0.0230576	0.000687766	-0.00951786	-0.00964251	-0.012176	-0.00955191	-0.0152964	0.020224	-0.0303555	-0.0231371	-0.00887193	0.0164607	-0.00381232	0.0344701	-0.00349452	0.00322818	-0.0446392	0.00673372	0.00992129
V508	0.0444201	-0.0437192	-0.00309407	-0.0322224	-0.0547971	-0.0989848	0.0131283	-0.0249017	-0.0146921	0.0134638	-0.00628796	-0.00827882	-0.00819797	-0.0163247	-0.00199457	-0.0207809	-0.0056801	0.00553789	-0.000648985	-0.0153597	0.0284536	0.0387834	-0.000620968	0.00942622	0.0700599	0.0111931	-0.00434719	-0.0134455	0.0370845	0.0133585	-0.000223535	0.0355508	-0.00781455	-0.0124005	0.00572771	0.014071	0.00187747	0.0283007	-0.0150025	-0.0134689	-0.0133291	-0.0136898	0.00052151	0.0326274	-0.00904828	0.00629873	-0.0488822	0.00499088	0.000921621
V509	0.045436	-0.0412759	-0.00446231	-0.030648	-0.0524112	-0.0942345	0.0126001	-0.0153623	-0.0122938	0.0169664	-0.0098626	-0.00247182	-0.0124013	-0.0286204	-0.00681348	-0.0226507	-0.0265629	-0.000680196	-0.00475782	-0.0229789	0.0240712	0.0129416	-0.0083484	0.00853739	0.0735376	0.017708	0.00639612	-0.00771108	0.0179048	0.013612	-0.0251174	0.0375278	0.000694683	-0.0309978	0.0155643	0.0175168	0.00209423	0.028431	0.00143002	0.0177259	-0.0137914	-0.0479419	0.0130508	0.0442421	-0.0148259	0.0196441	-0.0265834	0.00624863	0.00558197
V510	0.0464545	-0.0393929	-0.00583388	-0.0274741	-0.0528576	-0.0845006	0.0194983	0.0013903	-0.0132309	0.0213527	-0.0150066	0.00385663	-0.0222293	-0.027701	-0.00715906	-0.0174184	-0.05249	0.0134389	-0.0187386	-0.0312782	-0.0012063	-0.00873262	-0.0159391	-0.0134164	0.0515933	0.0155877	-0.000823438	-0.00146278	0.00604174	0.0258688	-0.0255265	0.0368741	-0.00160916	-0.0417482	0.00827401	0.0366423	-0.0182418	0.0275986	0.011664	0.0289174	-0.0112244	-0.0481256	0.0132773	0.0473132	-0.0102028	0.0145992	-0.00923035	0.00066633	0.0062118
V511	0.0466781	-0.0365242	-0.00752293	-0.023505	-0.0495315	-0.0757444	0.0312235	0.0107427	-0.00190036	0.019472	-0.0181955	0.00210846	-0.0228228	-0.0323284	0.00577747	0.00111576	-0.07128	0.0231758	-0.0295914	-0.0468934	-0.0129044	-0.0226085	-0.02064	-0.0427142	0.0324326	0.00984038	-0.0103052	0.0101271	-0.00822722	0.0358471	-0.0228231	0.036533	-0.00241179	-0.0415953	0.0134586	0.0486116	-0.0498868	0.0157144	0.023185	0.035473	-0.00129474	-0.0474716	0.0138495	0.0427599	-0.0234983	0.0064701	0.0240848	-0.0259055	-0.013383
V512	0.0471057	-0.0350005	-0.0107562	-0.0213067	-0.0523422	-0.0688311	0.03201	0.0181191	0.00186542	0.0133054	-0.0226622	-0.00612279	-0.0210007	-0.0251977	0.0183107	0.00928354	-0.0563265	0.0330828	-0.0383461	-0.048994	-0.0285536	-0.0288412	-0.00494064	-0.0577389	0.00926793	-0.0137447	-0.000612897	0.0193375	-0.0150415	0.0267898	-0.00967798	0.0262986	-0.0107652	-0.038394	-0.00181247	0.0509463	-0.0477848	0.00345664	0.0233516	0.0388544	0.0017494	-0.0251108	0.0225534	0.0280746	-0.0225044	0.00369002	0.0537996	-0.0419777	0.0022146
V513	0.0473582	-0.0349075	-0.0132605	-0.0216743	-0.0617835	-0.0614908	0.037857	0.00734562	0.00584095	0.0146868	-0.0258814	-0.0129507	-0.0184438	-0.0244045	0.0222756	0.0174089	-0.0369154	0.0337907	-0.0395955	-0.0397992	-0.029428	-0.0333139	0.00652386	-0.0501846	0.00394941	-0.0292244	-0.00868726	0.0170189	-0.0151218	0.019656	-0.018522	0.0172053	-0.00465651	-0.0401175	-0.0111048	0.0473446	-0.0412912	-0.00265256	0.011143	0.0273385	-0.00294895	-0.00510334	0.0062919	0.00281991	-0.0015434	0.00829789	0.0363341	-0.0610068	-0.00673794
V514	0.0476535	-0.0340406	-0.0167731	-0.0205081	-0.0687803	-0.0597875	0.0414934	-0.00514838	0.0034812	-0.00144074	-0.0149112	-0.008694	-0.00415517	-0.0202542	0.0258862	0.0309002	-0.0183756	0.0272472	-0.0397071	-0.0298145	-0.0273274	-0.0324199	0.0047423	-0.0405108	-0.00298606	-0.0329309	-0.0114595	0.00959029	-0.014948	0.0226828	-0.01168	0.00104093	0.00115569	-0.0267367	0.00381843	0.0475313	-0.0282892	-0.0132909	-0.00377705	0.0332418	-0.0121833	0.00176379	-0.0053731	-0.0298713	-0.00711208	-0.00441806	0.0268445	-0.0563433	0.00583623
V515	0.0476668	-0.0342603	-0.0216076	-0.0199675	-0.0694016	-0.0549736	0.0462085	-0.0164211	-0.0025839	-0.00351025	-0.00846649	-0.0111836	0.0135931	-0.0179375	0.00944979	0.0398283	-0.00449705	0.0372061	-0.0333566	-0.0240682	-0.0232216	-0.0159695	-0.00765362	-0.0215037	-0.00722777	-0.0201262	-0.00908374	-0.00224472	-0.0173632	0.0241592	-0.0140147	-0.0181921	0.00224926	-0.0124631	0.012243	0.0346619	-0.016142	-0.0285072	-0.00459405	0.0490223	-0.00171401	0.0231852	-0.00993082	-0.0512999	-0.00870149	-0.0200302	0.0157241	-0.0261095	0.0256026
V516	0.0476798	-0.0316353	-0.0253482	-0.014895	-0.0678819	-0.0597082	0.0526285	-0.0280154	-0.0109228	-0.00362191	0.00264718	-0.00300602	0.0198638	-0.0102166	0.000668104	0.0418975	0.0051449	0.0382234	-0.0271384	-0.00948219	-0.00368807	-0.00819521	-0.0120933	0.00185641	0.000935145	-0.00554715	-0.00253177	-0.0227045	-0.0225651	0.0201049	-0.000117033	-0.0231234	-0.00905753	-0.00326934	0.0196678	0.035867	0.00673515	-0.0158354	-0.00530202	0.0517848	-0.0103382	0.0245633	-0.0224936	-0.050638	-0.0274572	-0.0265112	-0.000826653	-0.00974247	0.0319557
V517	0.0476256	-0.0296692	-0.0318922	-0.0130498	-0.0623602	-0.0616605	0.0508295	-0.0352268	-0.00860458	0.00977067	0.0131167	-0.000642111	0.0144806	-2.69108e-06	-0.0115064	0.0467502	0.00835775	0.0286892	-0.0156733	-0.000805257	0.0141605	-0.00308194	-0.0264135	0.00656618	0.0106731	0.0167036	-0.000331878	-0.0447259	-0.0248948	0.0279453	0.00133214	-0.0310842	-0.0172561	0.010773	0.0201784	0.0206132	0.0173105	0.00130549	0.0039547	0.0466152	-0.0225638	0.0116883	-0.0216973	-0.0417557	-0.0318781	-0.0253629	0.00951651	0.00565544	0.0250284
V518	0.0476596	-0.0274112	-0.0378053	-0.00937274	-0.0624806	-0.0608357	0.0426202	-0.0374728	0.00178785	0.0211946	0.0185353	0.00318613	0.0168808	0.0113393	-0.0139943	0.0479145	0.00418445	0.0195926	-0.00262718	-0.00411762	0.0109322	0.00415252	-0.0251868	0.0109278	0.00378762	0.0372125	-0.000618685	-0.0541258	-0.0207642	0.021302	0.00232149	-0.0188701	-0.018332	0.0090531	0.0236655	0.0110463	0.0223933	0.0131802	0.0214148	0.0319718	-0.0192578	0.0112061	-0.0145287	-0.0274034	-0.0264709	-0.0282329	0.0124263	0.0142596	0.00991823
V519	0.0483351	-0.0247834	-0.0418837	-0.00852632	-0.0599396	-0.0527617	0.0368558	-0.035271	0.00734999	0.0311594	0.0145088	-0.00109172	0.00367326	0.0142261	-0.00807916	0.0438622	-0.00512946	0.00759865	-0.00777276	-0.0158862	0.0109643	0.0146575	-0.021954	0.0100506	0.00280023	0.0425225	0.00450831	-0.0483728	-0.017663	0.0270874	-0.00320772	-0.0133254	-0.0282145	0.00698425	0.029989	0.0161967	0.0190744	0.013932	0.0382879	0.0224009	-0.00874939	0.00735113	-0.00849445	-0.0057142	-0.0235833	-0.0124759	0.0240306	0.0176177	0.014164
V520	0.0487879	-0.0233714	-0.0421517	-0.00567551	-0.0579406	-0.0504329	0.0351542	-0.0339974	0.0241608	0.0416407	0.00982734	-0.00434274	0.0044333	0.0121744	0.00088845	0.0298907	-0.00671283	-0.000510785	-0.011339	-0.0229736	0.00883952	0.0206364	-0.01633	0.00443131	0.0104906	0.0307546	0.0146724	-0.0398281	-0.0102435	0.0191185	-0.00556035	-0.00394772	-0.0376775	-0.00748473	0.0254702	0.0281048	0.0124342	0.00878236	0.0478459	0.0286861	-0.009784	0.00999223	-0.00389383	0.0173528	-0.0220041	-0.00235083	0.0222251	0.00838291	-0.000558227
V521	0.049074	-0.0235161	-0.0397988	-0.00512638	-0.05918	-0.0450865	0.0367258	-0.0337388	0.0367187	0.0404457	0.00244885	-0.00189121	0.00374546	0.0116855	0.00986098	0.024387	-0.0142482	-0.00318725	-0.00948995	-0.0220637	-0.000754178	0.0208357	-0.00839099	-0.0113733	0.00532023	0.00838189	0.0155312	-0.0317512	0.0041036	0.0181688	-0.000381131	-0.00537011	-0.0483648	-0.00791622	0.0256451	0.0317099	-0.00843479	-0.00443846	0.0373377	0.0334087	-0.0207087	0.0168765	-0.000256731	0.0211481	-0.0123943	0.0202292	0.0071874	0.00791062	-0.0117644
V522	0.0489858	-0.0252273	-0.0394422	-0.00239675	-0.0623334	-0.0397195	0.0377714	-0.0298801	0.0439123	0.0372566	0.00245028	0.00301777	0.000901343	0.00943547	0.00407423	0.0193614	-0.0183024	0.00533748	-0.0102649	-0.0249779	-0.0054882	0.0144755	-0.00584	-0.0212781	-0.00743942	-0.00436321	0.013116	-0.016346	0.00990607	-0.000361761	-0.00179327	-0.0162729	-0.0409755	0.000602735	0.0179112	0.0341919	-0.0296295	-0.00991872	0.00734082	0.0254488	-0.0177574	0.0126873	0.00213706	0.0184203	-0.00971356	0.0274673	-0.00216956	0.00530446	-0.0263651
V523	0.0484765	-0.0267732	-0.0378802	-0.000998242	-0.062232	-0.0386307	0.0472945	-0.0341741	0.0464652	0.0336961	0.00318663	0.0122266	-0.00254841	0.00429489	0.014194	0.0239233	-0.0257033	0.00973491	-0.00686105	-0.0189322	-0.00507739	0.0100331	0.0060025	-0.0269407	-0.00628007	-0.00722369	0.0102971	0.00428901	0.0195224	-0.00831842	-0.00172456	-0.0386951	-0.0421961	-0.000329825	0.0111104	0.0373636	-0.0205735	-0.0244526	-0.0157241	0.00930197	-0.0217556	0.00915322	0.0184783	0.00702607	-0.00722762	0.0354407	-0.0120369	-0.00243192	-0.0457088
V524	0.0484145	-0.0272228	-0.036829	0.00403941	-0.0592705	-0.0399421	0.0573834	-0.0363599	0.0453122	0.0227914	0.00334902	0.0115305	-0.00517314	0.0049692	0.0168327	0.0264565	-0.0195442	0.0134047	-0.00666279	-0.00617127	-0.00899958	-0.000802232	0.0154453	-0.0183865	-0.00815662	-0.00979683	0.0164339	0.015479	0.0224058	-0.0111368	-0.00191491	-0.0519419	-0.0346231	0.00555217	0.00818711	0.0406259	-0.0165416	-0.0254632	-0.0281656	0.0109858	-0.0305821	2.68599e-05	0.0302449	-0.00082409	-0.0034687	0.0339884	-0.0267696	-0.00713252	-0.0346074
V525	0.0484424	-0.0267808	-0.0361385	0.00462097	-0.0548317	-0.0443498	0.0648042	-0.0378692	0.0389485	0.0155251	0.00709622	0.00532112	-0.00977599	0.00971497	0.0212698	0.028706	-0.0145149	0.0140391	-0.00976872	0.00409891	-0.0112645	-0.0126679	0.0182935	-0.00668279	-0.0122646	-0.00187898	0.022248	0.0236235	0.0140877	-0.0133231	-0.00149719	-0.0553554	-0.0212795	0.0156257	0.00591416	0.0252457	-0.0112449	-0.0158607	-0.0376652	0.00934903	-0.0420545	-7.78365e-05	0.0278676	-0.0100159	-0.0135729	0.0295077	-0.026442	-0.00301097	-0.0252124
V526	0.0486719	-0.02643	-0.0382588	0.00784463	-0.0509919	-0.0430588	0.0614269	-0.0349785	0.0240927	0.0155609	0.0073017	-0.0010856	-0.00933936	0.0224825	0.017548	0.0333381	-0.00724794	0.0113049	-0.0111499	0.0080128	-0.0143687	-0.0267846	0.0138624	0.011967	-0.0174888	0.0122967	0.0294591	0.0295817	0.00930415	-0.0166547	-0.00321294	-0.052494	-0.000195097	0.0127396	0.00855603	0.0137854	-0.00122398	0.000194236	-0.039582	0.000192674	-0.0317882	-0.000380802	0.0214598	-0.0124262	-0.0136011	0.0199903	-0.022395	-0.00903066	-0.0213394
V527	0.0493003	-0.0237653	-0.0397621	0.00991467	-0.0445661	-0.0399536	0.0576266	-0.0371027	0.00979672	0.0170838	0.00902859	-0.00475546	-0.0089992	0.0284365	0.014487	0.0344327	0.00140339	0.0124037	-0.00105395	0.0122246	-0.0176656	-0.0369193	0.000493703	0.0213886	-0.0181994	0.028121	0.027714	0.0264621	0.00694245	-0.021123	0.00183383	-0.0446445	0.00220043	0.00770133	0.00384506	0.00346286	0.00662147	0.0118709	-0.0317004	-0.00836409	-0.032954	-0.00565062	0.0163705	-0.015047	-0.00981553	0.0119997	-0.0140708	-0.0240389	-0.00848432
V528	0.05023	-0.021217	-0.0396135	0.0101322	-0.0408109	-0.0371708	0.0494397	-0.0368531	0.00338382	0.0174631	0.00885935	-0.00802642	-0.0077099	0.0418747	0.0168977	0.0349136	0.0051176	0.0078232	0.00501244	0.008317	-0.0170118	-0.0328544	-0.00375774	0.0217746	-0.016152	0.0345543	0.0150914	0.0240656	0.00620326	-0.0238307	0.00884676	-0.0270786	0.0125803	0.00555808	0.00136246	0.00227445	0.00436069	0.0198699	-0.00773468	-0.0182875	-0.0143697	-0.000356065	0.00831953	-0.00232309	-0.0125229	0.0119517	-0.00890049	-0.0329826	-0.00861216
V529	0.0508118	-0.0182921	-0.0404967	0.0108566	-0.0412839	-0.0335408	0.0399073	-0.0374458	0.00197182	0.0106877	0.0075365	-0.00977771	-0.00786998	0.0416551	0.0175178	0.025722	0.00948589	0.0044421	0.0117399	0.0103585	-0.0117019	-0.0259392	-0.00392237	0.0228532	-0.0125135	0.0435182	0.0015632	0.0123832	0.00230391	-0.0281964	0.0148866	-0.018713	0.0180741	0.00182007	0.000656964	-0.00259659	0.00485541	0.0238744	0.00458736	-0.0233359	-0.0130683	-0.0113545	0.0131973	0.011819	-0.0185246	0.0194504	-0.000882996	-0.038481	0.0129015
V530	0.0512645	-0.0171743	-0.0395779	0.0150197	-0.0426779	-0.0278559	0.0331693	-0.033265	0.000620489	0.00676212	-0.00393195	-0.00552498	-0.0103721	0.0367351	0.0178329	0.0175958	0.0119652	0.00840591	0.0182664	0.0134084	-0.00807821	-0.00753464	-0.00441884	0.0262299	-0.0117087	0.0362102	-0.0206571	0.00415494	-0.00365374	-0.0268868	0.00916986	-0.0130826	0.00606817	-0.0031325	-0.000484511	-0.00370595	0.00259662	0.0209404	0.0034385	-0.0403822	-0.0136767	-0.014534	0.00644401	0.0116892	-0.0119071	0.0375554	-0.00700508	-0.035926	0.0283286
V531	0.051689	-0.0152069	-0.0395726	0.0189611	-0.0447299	-0.026881	0.0278658	-0.0263288	0.000332378	-0.00284732	-0.00195743	-0.000800248	-0.00277178	0.0267098	0.0134999	0.0152392	0.00399796	0.00475543	0.019571	0.00430205	0.00700869	0.00933668	-0.0150112	0.0198031	-0.00804972	0.0324587	-0.0361417	0.00131034	-0.00956807	-0.0185616	0.00588683	-0.00402553	0.00622402	-0.00812656	0.00899924	0.00104128	-0.0081998	-0.00624799	-0.00253948	-0.0343494	-0.0123534	-0.0173747	0.00655946	0.00614602	-0.00634127	0.0389801	-0.0204495	-0.0241119	0.0228261
V532	0.0519767	-0.0152263	-0.0400526	0.0257716	-0.0359855	-0.0253796	0.0221101	-0.0166496	-0.0021042	-0.00480874	-0.0018412	0.00175116	0.00568908	0.0225897	0.0162887	0.0177162	-0.0052675	0.0131125	0.0100283	-0.00135622	0.00544969	0.0220598	-0.0197244	0.00509407	-0.00630886	0.0218209	-0.0299599	0.00748071	-0.0185935	-0.0125102	0.00976129	-0.0114056	-0.00723544	-0.000206888	0.0168216	0.00562353	-0.00798961	-0.0216861	-0.0111026	-0.0312178	-0.00618353	-0.0090742	0.00655618	-0.000186093	-0.0183308	0.0512597	-0.0138214	-0.00576386	0.0278765
V533	0.0519018	-0.0155997	-0.0395097	0.0277468	-0.0333112	-0.0273725	0.0227818	-0.01015	-0.00316185	-0.000572419	-0.0018195	0.005748	0.0127635	0.014427	0.0148574	0.0257692	-0.0173071	0.0244267	0.00285907	0.0108453	0.0155344	0.0187513	-0.0241014	-0.00521936	-0.0094493	0.0137365	-0.0154159	0.00848132	-0.0302883	-0.00608883	-0.00317701	-0.0176903	-0.014455	0.00385525	0.0240843	0.00740456	0.000200749	-0.0215341	-0.0156136	-0.0361327	-0.00484915	-0.00303366	0.0141287	-0.00150861	-0.0215048	0.0546644	-0.0165898	0.00014862	0.0218203
V534	0.0515443	-0.0161673	-0.038787	0.0323821	-0.0323579	-0.0331691	0.0246983	-0.00877467	-0.00847417	8.70236e-05	0.00562332	0.00747929	0.013596	0.0173548	0.0117683	0.0339968	-0.0215342	0.0242361	-0.00690551	0.0199533	0.0223916	0.00165427	-0.01635	-0.0168743	-0.0110438	0.010799	0.000698785	0.0177717	-0.0377563	0.00206086	-0.00763327	-0.0177175	-0.0174041	0.00569254	0.0330496	0.0119616	0.0125846	-0.0184787	-0.0302721	-0.0377548	-0.00605711	-0.0033785	0.0235628	-0.00843658	-0.0290204	0.0491826	-0.00887045	-0.00160705	0.0127758
V535	0.0515331	-0.0177285	-0.0363291	0.0312811	-0.0278072	-0.0347881	0.0266048	-0.0104489	-0.010401	0.00175903	0.0101231	0.00395902	0.0125435	0.0189065	0.00514405	0.0373775	-0.0152393	0.0238767	-0.0073718	0.0233673	0.0194611	-0.0122238	-0.0124192	-0.0218869	-0.016827	0.0116712	0.0196636	0.0313858	-0.0374407	0.0163344	-0.0143396	-0.01727	-0.0148789	0.0103937	0.043258	0.0145111	0.0244979	-0.0324184	-0.0242586	-0.0301294	-0.000291066	0.00551565	0.0438457	-0.0256281	-0.0322611	0.0396004	0.00710545	0.00516825	0.014369
V536	0.0517177	-0.0186046	-0.0325239	0.0268655	-0.028949	-0.0316631	0.0273402	-0.0178783	-0.0187193	-0.000330131	0.00827268	0.00260729	0.0101853	0.0203253	0.00624984	0.0380198	-0.00917029	0.0264627	-0.00735884	0.0240799	0.0216247	-0.0266146	-0.005079	-0.0113725	-0.0185153	0.00824239	0.0377877	0.037278	-0.0319633	0.0183918	-0.013001	-0.00402046	-0.0122973	0.00876864	0.0524406	0.0258502	0.0293996	-0.040694	-0.0110472	-0.00993205	0.00566998	0.0215708	0.0429166	-0.0304053	-0.0263697	0.0307347	0.0150172	0.0110949	0.0180281
V537	0.0516664	-0.0197542	-0.0304562	0.0239023	-0.0325766	-0.0292677	0.0240956	-0.0221853	-0.0227724	-0.00590892	0.00666789	-0.00235073	0.00237694	0.0204942	0.00205152	0.0323688	0.00279726	0.0281188	-0.00276348	0.0247132	0.0310129	-0.0432557	-0.00050166	0.00886034	-0.0193226	0.00671294	0.0514348	0.0320997	-0.0256989	0.0114884	-0.00990686	-0.00703676	-0.0125946	0.00690527	0.0567395	0.025813	0.0161511	-0.0342166	0.00143052	0.00858918	0.00367341	0.0258031	0.0239917	-0.0255555	-0.0170414	0.0231166	0.0134926	-0.0006274	0.016176
V538	0.0514829	-0.0213697	-0.0275823	0.0230384	-0.0404245	-0.0327657	0.0139391	-0.0228091	-0.022435	-0.0104865	0.00573338	-0.00186795	0.00118529	0.0268932	-0.000151963	0.024576	0.0173217	0.0338648	0.00880312	0.0227177	0.0328785	-0.0491243	-0.00125397	0.0173702	-0.0232341	-0.00258131	0.0596669	0.0258168	-0.0175753	-0.00427879	0.00136021	0.00215121	-0.00805688	-0.00983998	0.0511867	0.0143314	0.0017182	-0.0387809	0.0114634	0.00679678	0.00359001	0.02442	0.0104952	-0.0154993	-0.00248692	0.00958042	0.0028729	-0.00310079	0.0101876
V539	0.0517106	-0.0226329	-0.022489	0.0182983	-0.0454333	-0.0333986	0.00104107	-0.0235351	-0.0248585	-0.0159698	0.00636806	0.00544967	-0.00819608	0.0140849	0.0120666	0.0173244	0.0180216	0.0336754	0.0164914	0.0125105	0.0304965	-0.0413005	-0.0086026	0.0247468	-0.0272133	0.0028068	0.0340711	0.0296279	-0.0162923	-0.00763853	0.0196751	-0.00280215	-0.00328548	-0.00441978	0.0319317	0.00301216	-0.0128707	-0.0526453	0.0251411	-0.00428804	0.00257244	-0.00504326	0.00501149	-0.0075482	0.0207327	0.00480905	0.000620359	0.003244	0.0225168
V540	0.0512347	-0.0246658	-0.0203619	0.0145546	-0.0491753	-0.0394563	-0.00818961	-0.0213778	-0.0247475	-0.0127852	0.00606896	0.0167402	-0.016556	-0.00323657	0.0225682	0.00995648	0.0133571	0.037566	0.0218929	0.0074072	0.028598	-0.0260668	-0.0076527	0.0345721	-0.0188741	0.00858525	0.00517853	0.0419415	-0.0164183	-0.0176499	0.0257219	-0.0116514	3.52431e-05	-0.00498268	0.0128695	-0.00531878	-0.0225503	-0.0459943	0.0266268	-0.0196167	0.000234707	-0.0301241	0.00751535	0.00972943	0.0419793	-0.00110677	2.01011e-05	-0.00784233	0.0387435
V541	0.0509933	-0.0247932	-0.0168638	0.012644	-0.0441319	-0.0490029	-0.0140772	-0.0175171	-0.0259855	-0.00804103	0.00597746	0.0219691	-0.0282469	-0.0152267	0.0425347	0.011187	0.00423113	0.0363691	0.0156603	0.0142829	0.015923	-0.00537505	0.00378694	0.0232179	-0.0169899	0.00890973	-0.0111372	0.0482755	-0.0121124	-0.0121753	0.0245073	-0.0169956	-0.0094708	-0.00312334	0.00493397	-0.0109332	-0.0290369	-0.0425259	0.0338325	-0.0269631	-0.00461071	-0.0569059	0.00805342	0.0169117	0.0590228	0.00680847	-0.00651297	0.00310781	0.049615
V542	0.0505151	-0.0257025	-0.0140213	0.0136127	-0.0398487	-0.0585627	-0.0188546	-0.00510598	-0.0280247	-0.000514545	0.0051478	0.0259464	-0.0295125	-0.0234942	0.0544778	0.00374447	0.00274162	0.0345665	0.00558757	0.0180341	0.00499596	0.00711504	0.0131809	0.0107225	-0.0326774	0.0161423	-0.0114786	0.0506306	-0.0132608	-0.019049	0.0215468	-0.012195	-0.0146877	0.00275664	-0.000810429	-0.0117976	-0.0289883	-0.0211281	0.0140263	-0.0400789	-0.0130723	-0.0642957	0.0115723	0.0203079	0.0626823	-0.00721599	-0.0150169	-0.00871932	0.0662903
V543	0.0506861	-0.0281944	-0.0108145	0.0122301	-0.0324356	-0.0563368	-0.019983	0.000136398	-0.029249	0.0194954	0.00580359	0.0231795	-0.0252173	-0.0259939	0.0608623	0.00182996	-0.0116307	0.0279064	0.000759364	0.0165921	-0.00574529	0.00658941	0.00700774	-0.0037533	-0.0319998	0.014674	-0.0093097	0.0587482	-0.00842615	-0.0148879	0.00296819	0.00808111	-0.0280871	0.0082867	-0.00140418	-0.0237609	-0.0122326	-0.0114491	0.00336985	-0.0369507	-0.0142915	-0.0473529	0.0042554	0.0119804	0.047504	-0.0182831	-0.00938134	-0.036747	0.0455072
V544	0.0508742	-0.0293574	-0.00631403	0.0100722	-0.029365	-0.0461233	-0.0205195	0.00949441	-0.0319527	0.0314931	0.00545777	0.0141463	-0.0206995	-0.0215083	0.0581744	-0.000439852	-0.0169046	0.0201207	0.00440436	0.0212266	-0.0258101	0.00455951	0.0070206	-0.00953426	-0.0232557	0.0148027	-0.00361494	0.0639791	-0.00861944	-0.0262131	-0.0151953	0.0206793	-0.0414642	0.00782355	0.000180877	-0.0308058	0.0115297	0.00662422	0.0021408	-0.0327606	-0.00557689	-0.0225371	0.0198964	-0.00892044	0.0211321	-0.0401273	-0.0125672	-0.0595233	0.0213471
V545	0.0504291	-0.0311798	0.000146693	-0.000362242	-0.0362169	-0.0366989	-0.026256	0.00480977	-0.0330928	0.0433367	0.0154566	0.0106058	-0.018477	-0.0172057	0.0458819	0.000488179	-0.0206243	0.0285293	0.01421	0.0243066	-0.0283707	-0.00461553	0.0247366	-0.0251263	-0.0196103	0.0232327	0.00377184	0.0427329	0.00355079	-0.0336692	-0.0201422	0.039253	-0.0397323	0.00510008	0.0109356	-0.0323579	0.0135493	0.0307947	0.00364952	-0.0303735	-0.00511538	0.0049529	0.0279607	-0.0283163	0.00911717	-0.0442963	-0.00279007	-0.0659442	-0.00674523
V546	0.0497522	-0.0330551	0.0014917	-0.000660588	-0.0495655	-0.0283308	-0.0256906	0.0049011	-0.0331436	0.039391	0.0113152	0.00407145	-0.0264415	-0.0122777	0.0235022	-0.00336334	-0.0084109	0.0423928	0.019669	0.0171698	-0.0294491	-0.0197169	0.0455226	-0.0209278	-0.0325986	0.00955456	0.00291965	0.0123042	-0.00310768	-0.0241972	0.00139024	0.0404384	-0.0214382	-0.00699435	0.0352549	-0.0318205	0.00445812	0.0280142	0.0060532	-0.0177043	-0.0330493	0.037016	0.0323674	-0.0551137	-0.01982	-0.0583929	-0.00484869	-0.0645429	-0.0223503
V547	0.0492962	-0.0337917	0.00246593	-0.000672431	-0.0508386	-0.0228733	-0.0286494	0.000798856	-0.027857	0.0232516	0.0106093	-0.00333417	-0.0292451	-0.0270274	-0.00652895	0.00119377	0.0230443	0.0647155	0.0337608	-0.00212604	-0.0261344	-0.0228108	0.0384604	-0.0134547	-0.0214472	0.00468766	-0.00543377	-0.0205935	-0.0241001	-0.025965	0.0293212	0.0375483	-0.00739613	0.00164426	0.0433673	-0.0161366	-0.00798764	-0.00100298	-0.014729	-0.00291736	-0.056629	0.0484938	0.0292597	-0.073644	-0.0182451	-0.0620023	-0.000997766	-0.0684136	-0.025991
V548	0.048094	-0.0352746	0.00679019	0.000691707	-0.0515931	-0.0283866	-0.037026	-0.00132055	-0.0381337	0.0152207	0.0107925	0.00150335	-0.0338567	-0.0306699	-0.0145205	0.00297622	0.0310946	0.0730952	0.0333065	-0.0323431	-0.0155319	-0.00994777	0.0262904	0.00549393	-0.00790349	-0.00439151	-0.015725	-0.0350265	-0.0383204	-0.0322051	0.0610712	0.0317706	0.018038	-0.0192087	0.0471954	0.0165373	-0.0411183	-0.0244516	-0.0256819	0.0135248	-0.0412036	0.0421369	0.00281273	-0.0534339	-0.0100146	-0.0609018	-0.00299327	-0.0784697	-0.0346558
V549	0.0472423	-0.0347482	0.00735229	0.00393455	-0.058645	-0.0322955	-0.0451686	0.00441993	-0.0478302	-0.00601645	0.00756405	0.00435932	-0.0333018	-0.0360289	-0.00426272	-0.00378872	0.0381752	0.079519	0.0117129	-0.0315845	-0.00757616	0.00372717	0.00965514	0.0121376	0.00460818	0.00953976	-0.0166375	-0.0314453	-0.0421326	-0.0300657	0.0895419	0.0192077	0.0336334	-0.0193593	0.031864	0.0228926	-0.0605589	-0.0365725	-0.0261946	0.0317804	-0.0229989	0.0263565	0.0140873	-0.016709	-0.0152576	-0.0506212	0.0158811	-0.0588539	-0.0228535
V550	0.0464618	-0.0373256	0.0111469	0.00725369	-0.054343	-0.0378173	-0.0383418	0.000576689	-0.0537537	-0.0104163	-0.00810573	-0.00658591	-0.0457309	-0.0446739	0.0125258	0.00105343	0.0468376	0.074074	0.00954795	-0.0134717	-0.00263038	0.0174776	0.00401399	0.0183731	0.0244697	0.00779539	-0.00449814	-0.00716486	-0.0468751	-0.0115448	0.0956645	-0.0133008	0.0650754	-0.0184667	0.0212771	0.019901	-0.0605629	-0.0225587	-0.0233435	0.0230751	0.00566749	0.00342422	0.021788	0.0160497	0.00518991	-4.15799e-05	0.0336168	-0.0346313	-0.00707299
V551	0.0453987	-0.0378475	0.0140287	0.00677657	-0.0593889	-0.0505775	-0.0268189	0.000663111	-0.0563225	-0.0149424	-0.00928148	-0.00412959	-0.0437459	-0.0463244	0.0128257	-0.0044509	0.0534798	0.0498093	0.0141217	0.00212607	0.0102137	0.0325188	-0.00289387	0.0095268	0.0183373	0.00220995	0.00421243	0.0246619	-0.0544467	0.0170511	0.0942355	-0.02792	0.0694312	-0.0141052	0.00155496	0.0266363	-0.0402941	-0.0337559	-0.00979555	0.0329783	0.0268247	-0.0240024	0.0392054	0.046429	0.0315502	0.0299734	0.0372638	-0.0193243	0.00415181
V552	0.0444353	-0.0395653	0.0189979	0.0124091	-0.0476761	-0.0613374	-0.021183	-0.000790913	-0.0561082	0.00348668	-0.0114489	-0.00341779	-0.059079	-0.0375944	0.011019	-0.026227	0.050121	0.0245148	0.0172074	0.0147895	0.0166396	0.0450058	-0.00214706	-0.0251629	0.0389653	0.0024141	0.0145911	0.0629528	-0.0373944	0.0394396	0.0920178	-0.0492765	0.0515559	0.00405171	-0.0304851	0.0382933	-0.0102737	-0.0258938	0.00875537	0.0438878	0.0538945	-0.0401432	0.0201204	0.0529405	0.0465267	0.0702955	0.0430298	0.00298275	0.0134911
V553	0.0429638	-0.0457658	0.0281262	0.002667	-0.0372841	-0.0576021	-0.0152063	-0.000503128	-0.0459859	0.0156381	-0.0250227	0.00826494	-0.0706221	-0.0359048	0.00782102	-0.0364631	0.0214501	0.00538689	0.030338	0.0302855	0.0281134	0.0392435	-0.00509716	-0.0449332	0.0404487	0.000192107	0.0326403	0.0762002	-0.00856097	0.0342232	0.0624806	-0.0592382	0.0461007	0.0322738	-0.0401483	0.0348139	0.00558078	0.00424159	0.0583125	0.0663596	0.05489	-0.038886	0.0221146	0.0600993	0.0556273	0.0792395	0.0439771	0.0291204	-0.000453574
V554	0.0412468	-0.0503807	0.0360078	0.00133159	-0.0385161	-0.0503517	-0.014197	0.0047893	-0.0301538	0.0277778	-0.0335925	0.0227353	-0.073522	-0.0365451	0.0130809	-0.0420892	-0.00561217	-0.0273453	0.0430637	0.0211349	0.0522801	0.0178504	0.000991985	-0.0610009	0.0293571	0.00583879	0.0320946	0.074596	-0.00290515	0.0264039	0.0250016	-0.0552308	0.0378048	0.0476279	-0.0370199	0.0206404	0.0200504	0.0291636	0.0759517	0.0843976	0.0332319	-0.0242789	-0.00168497	0.0322895	0.0506721	0.103161	0.0323857	0.051217	-0.0317044
V555	0.0402416	-0.0539145	0.0407604	0.00165325	-0.0369631	-0.0434232	-0.0115976	0.0101461	-0.00331354	0.0172197	-0.0345748	0.0398996	-0.0801429	-0.0395951	0.00473375	-0.0390169	0.00625858	-0.0304926	0.0425107	0.00626505	0.0766319	-0.00706691	-0.0122252	-0.0555078	0.0162261	0.00145847	0.0219201	0.0365708	-0.0169627	0.0231905	0.000602396	-0.0387984	0.00734187	0.0581695	-0.0143412	-0.0031961	0.0166258	0.0349202	0.0937053	0.0465099	0.00725942	0.0082526	0.00732734	0.00573554	0.0204021	0.0681632	0.0217902	0.0645919	-0.0706576
V556	0.0389278	-0.0558109	0.0480026	0.00432576	-0.0392086	-0.0342754	-0.0164792	0.00625555	0.00439868	0.00214895	-0.040533	0.0539358	-0.073766	-0.0350152	-0.00719568	-0.026902	0.0133574	-0.0498516	0.0399668	-0.0191563	0.0608789	-0.00239545	-0.0198179	-0.0433762	0.0067677	0.00292322	-0.00289785	-0.00185044	-0.0201932	0.0103756	-0.0168426	0.00380884	0.0343994	0.0391693	-0.0036249	-0.0099399	0.00855367	-0.000423161	0.0842183	0.0270342	-0.00836146	0.0278612	0.0239002	-0.0238585	0.0271607	0.0305793	0.0188606	0.0794303	-0.0694413
V557	0.0379185	-0.0577053	0.0495786	0.0103577	-0.041598	-0.0264212	-0.0148045	-0.000100134	0.00709669	-0.0119642	-0.0394462	0.0659814	-0.073676	-0.0477562	-0.00980148	-0.0205272	0.0304948	-0.061597	0.0260411	-0.0272328	0.0170106	0.00467545	-0.0011784	-0.0361813	0.0122377	0.0332862	-0.03361	-0.0326947	-0.0152766	0.000422319	-0.00247872	0.0274529	0.0424489	0.0147066	0.023503	-0.0454187	-0.0209056	0.00186446	0.0617962	0.0205142	-0.0244448	0.0293061	0.0311492	-0.0483359	0.0358865	-0.0101079	-0.0021795	0.0669035	-0.0612655
V558	0.0372719	-0.0583101	0.0478263	0.0195822	-0.0388076	-0.0260357	-0.0147002	0.00241195	-0.000105952	-0.0199265	-0.042369	0.0521424	-0.0821116	-0.0359405	-0.0141832	-0.0190463	0.0643943	-0.0639818	0.0233473	-0.0249775	0.00134925	0.0143746	0.00404989	-0.0371216	0.0110757	0.01019	-0.0143495	-0.0120695	-0.0199761	-0.0181147	-0.0181452	0.0586221	0.0598265	-0.0206268	0.048859	-0.0742785	-0.0236009	-0.00501217	-0.00795382	0.0034748	-0.0232469	0.0534014	0.02755	-0.0650006	0.0495902	-0.0362489	-0.0115477	0.0275306	-0.0498906
V559	0.0365009	-0.0567572	0.0522296	0.031255	-0.0351726	-0.0179335	-0.00858365	0.00334464	-0.00735851	-0.0309226	-0.0392261	0.0491652	-0.0782835	-0.0258349	-0.00507054	-0.0355455	0.0729948	-0.0623648	0.0232313	-0.0361735	-0.0415926	0.0257973	-0.0194767	-0.028768	-0.00284443	0.00211209	0.00131496	0.0216319	-0.000772838	-0.0312155	-0.0125121	0.0694438	0.0553603	-0.024491	0.0496656	-0.0721888	-0.0234062	-0.0406591	-0.0727282	-0.00356687	-0.00264841	0.0364527	0.033635	-0.0533422	0.0480292	-0.0643414	-0.0276	0.0197484	-0.0416328
V560	0.0355251	-0.0590871	0.0555411	0.0370101	-0.0394785	-0.0136024	0.00506316	0.0037747	-0.000708597	-0.0153431	-0.0284127	0.0321869	-0.0653736	-0.00782386	-0.0086986	-0.0321355	0.0737597	-0.0594819	0.0299471	-0.0230096	-0.0563227	0.0184872	-0.0336902	-0.00731676	-0.0115642	-0.0278347	0.0202168	0.0395402	0.00713058	-0.030335	-0.0206795	0.0701568	0.0215963	-0.032188	0.0544681	-0.0624671	-0.0066466	-0.0464475	-0.102374	0.0130661	0.0292371	0.040001	0.0223055	-0.0234002	0.0441067	-0.0835768	-0.0457341	0.00574375	-0.0216893
V561	0.0335045	-0.0607275	0.0498639	0.0469317	-0.0378168	-0.0126852	0.0150333	0.0115575	-0.00111391	-0.00243812	-0.00710208	0.00264303	-0.0763437	0.00324945	-0.0112532	-0.0208768	0.0715435	-0.0457821	0.0286706	-0.0257597	-0.0744919	0.0464373	-0.0284906	0.0110029	-0.0165102	-0.0568297	0.0405417	0.0839789	0.0232732	-0.0339467	-0.0373404	0.0755294	-0.00869325	-0.0187888	0.0516422	-0.0613658	-0.002594	-0.0438997	-0.0979434	0.0408889	0.0681909	0.0349162	-0.00124951	-0.0154126	0.0241669	-0.0822634	-0.00873256	0.0137382	-0.0374994
V562	0.0311734	-0.0619119	0.0523074	0.0454177	-0.0482567	-0.0188267	0.00772541	0.0179201	-0.000257455	-0.00451355	0.00827076	-0.00719705	-0.0733446	0.0202	-0.0116702	-0.00454515	0.0616299	-0.0465393	0.0280077	-0.022056	-0.0623734	0.0569164	0.0161973	0.00479137	-0.0532339	-0.0699892	0.0481011	0.0877649	0.0175958	-0.0633923	-0.0271168	0.0683128	-0.0425249	-0.0130263	0.0607974	-0.0406179	0.00699118	-0.000397722	-0.0922965	0.0289214	0.0844015	0.0273861	-0.0102539	-0.0208165	0.000163411	-0.0441803	-0.0270337	0.0431708	-0.0304
V563	0.0301902	-0.0623471	0.0523319	0.0497497	-0.0537914	-0.0176278	0.00892246	0.0189975	0.00496516	0.0140159	0.0246234	-0.0082652	-0.0547785	0.0490663	-0.0400058	0.0270162	0.0406685	-0.0180983	0.000864391	-0.0491497	-0.027072	0.0518895	0.0494264	-0.0184254	-0.0816919	-0.0876145	0.0436598	0.0662024	0.0104099	-0.0659383	0.00311081	0.0404572	-0.0381617	-0.00521944	0.0587312	-0.0114312	-0.0208452	0.0174238	-0.0772963	0.044038	0.0788438	0.038935	-0.0183091	0.00230744	-0.0091654	-0.046005	-0.0300667	0.0229857	-0.0156256
V564	0.0301056	-0.0608146	0.0552088	0.0555394	-0.0607684	-0.0167826	0.019008	0.017721	0.0249877	0.0276167	0.0404936	-0.00892289	-0.0283539	0.0431623	-0.0489498	0.0322116	0.00414212	0.0135055	-0.0157802	-0.0677817	-0.00155646	0.0462172	0.0295521	-0.0276311	-0.0725675	-0.112314	-0.00256263	0.0390183	-0.0215931	-0.0451634	0.0314694	0.000435836	-0.0517941	0.0194479	0.0442141	0.0174099	-0.045293	0.00638992	-0.0456825	0.0474837	0.0529975	0.0301305	-0.0172395	0.00405447	-0.0162234	-0.0578806	-0.0487692	-0.0106192	0.0343506
V565	0.0295525	-0.0571253	0.0631999	0.0635519	-0.0643756	-0.00405222	0.0104029	0.017313	0.0287633	0.0127312	0.049575	0.00150741	-0.000101947	0.0625717	-0.0170983	0.0520909	-0.0346207	0.0312161	-0.0259476	-0.060362	0.0173274	0.0441858	0.0157079	-0.0309447	-0.0572875	-0.090439	-0.0356088	0.00238377	-0.00407681	-0.0366626	0.043159	-0.0165101	-0.000812686	0.0541272	0.0342208	0.0100142	-0.0957058	0.0421305	-0.0165688	0.0212821	0.0514578	-0.00673674	0.0206489	0.0270502	-0.0118916	-0.0462792	-0.0684808	-0.00807692	0.0486591
V566	0.0264312	-0.051842	0.0714555	0.0647689	-0.0765221	0.0123798	0.0174487	0.0126781	0.0160924	-0.00988929	0.0175194	0.0253582	0.0123943	0.0782822	0.0210736	0.049704	-0.0611339	0.0316376	-0.0353632	-0.0567121	0.0416353	0.0213091	0.00822163	-0.00626187	-0.0505785	-0.065302	-0.0503161	-0.0482443	0.0383745	-0.00625461	0.0377634	-0.0300248	0.0439473	0.02664	0.0607549	0.00674474	-0.108066	0.0535822	0.00775009	-0.0327432	-0.000725204	-0.0074506	0.0296902	0.0348135	-0.0195593	-0.0689084	-0.0952353	-0.0168904	0.0474557
V567	0.0239325	-0.0461724	0.0754764	0.0618331	-0.075291	0.0373627	0.0271925	0.0185602	0.0118213	-0.052574	-0.00599633	0.0102982	0.0313967	0.0963465	0.0336833	0.047834	-0.0715587	0.0111222	-0.0180417	-0.0614426	0.0495417	-0.0024342	-0.0154396	0.00814785	-0.0427187	-0.0326823	-0.0304076	-0.0629478	0.0724505	0.0144505	0.0276944	-0.0506823	0.0830932	0.0442701	0.0621756	-0.0137815	-0.0992791	0.0280693	-0.00258572	-0.0827448	-0.029428	0.0343277	0.0733788	0.0142383	-0.000964904	-0.0758714	-0.0973196	0.00170125	0.0301336
V568	0.0223438	-0.0481196	0.0774686	0.0545219	-0.0776039	0.0422026	0.0282415	-0.00230983	-0.00325595	-0.0587775	-0.0254871	0.0276212	0.029248	0.0914303	0.00998522	0.046553	-0.0643571	-0.0139239	0.0254892	-0.0493815	0.0311663	-0.0262469	-0.0667991	0.0362656	-0.0421454	-0.0366241	-0.00256033	-0.0488372	0.0924256	0.0320385	0.0285859	-0.0658885	0.104962	0.0223795	0.0629179	0.0205895	-0.103882	0.0137587	-0.0223037	-0.0712692	-0.0343399	0.0452533	0.0667354	0.00822087	0.038721	-0.0549939	-0.076073	-0.0100351	0.027951
V569	0.0209017	-0.0510506	0.0768673	0.05074	-0.0833398	0.0341119	0.0185732	-0.0200238	-0.00654064	-0.0646758	-0.0537544	0.0447059	0.0323685	0.0905433	-0.0119052	0.0256163	-0.0462263	-0.0362864	0.0430612	-0.0212456	0.00986469	-0.0538553	-0.108887	0.0485063	-0.0551574	-0.0247899	-0.0159682	-0.0196566	0.116801	0.0414219	0.00790437	-0.0275136	0.0848048	0.0421204	0.0130646	0.0396076	-0.0949279	0.00665585	-0.0245119	-0.024417	-0.0255662	0.0304433	0.056462	0.00731697	0.0578668	-0.0407134	-0.032356	0.00636705	0.0280673
V570	0.0178648	-0.056748	0.0782029	0.0472142	-0.0717334	0.0236946	0.00231694	-0.0334708	-0.0195631	-0.054287	-0.0754178	0.0506197	0.00345996	0.0637336	-0.0267477	0.00306646	-0.0179067	-0.0423669	0.0597373	-0.0021561	-0.00281723	-0.0836418	-0.116623	0.0372141	-0.0644373	-0.0255167	-0.0026328	0.0264928	0.133237	0.0330848	-0.00781114	-0.00412966	0.093015	0.0370655	-0.0174033	0.0545982	-0.0922469	-0.00669575	-0.00965084	0.0202793	-0.0126657	0.0101993	0.0108714	0.0284205	0.0897643	-0.010899	0.0134061	-0.00169002	-0.000848406
V571	0.017436	-0.0582404	0.0799539	0.0371103	-0.0753425	0.00959312	-0.0138074	-0.0514116	-0.023437	-0.0318733	-0.0836543	0.0587247	-0.0260243	0.0230853	-0.0421708	-0.015268	0.010301	-0.0282617	0.0499871	0.00856576	0.0150446	-0.0957287	-0.0969855	0.0102733	-0.106755	-0.0425657	0.00170431	0.0408055	0.0915239	-0.0040052	-0.0205263	0.0173769	0.0492558	0.0558263	-0.0284783	0.0640323	-0.0478826	-0.0326288	-0.00230347	0.0513857	0.00511824	0.0236533	-0.00713647	0.024157	0.0954092	0.0157815	0.0675984	-0.0199204	-0.0101439
V572	0.0206132	-0.0584261	0.07887	0.037691	-0.0686011	0.00155872	-0.0306291	-0.0390033	-0.00260778	-0.0208261	-0.0869438	0.0442924	-0.0382464	-0.0148418	-0.0577242	-0.0327028	0.0306437	-0.018355	0.0396762	-0.00237688	0.0433919	-0.0721175	-0.0695107	-0.0173406	-0.122146	-0.0137827	0.00683721	0.023646	0.0438813	-0.0512527	-0.0134571	0.0432602	-0.0123527	0.0576685	-0.0315265	0.0587541	0.00729965	-0.0367984	0.0414035	0.0430799	0.0383746	0.0675159	-0.0572532	0.0205795	0.0754731	0.0380062	0.0628419	-0.0290115	-0.00447392
V573	0.0238002	-0.0577674	0.0798118	0.0442626	-0.0519635	-0.00165525	-0.0266467	-0.0342954	0.00812368	-0.0180193	-0.0660344	0.0115657	-0.0343893	-0.0306422	-0.0798823	-0.0512951	0.0199891	0.00443564	0.00623042	-0.0136105	0.0473115	-0.0506884	-0.0197773	-0.0418192	-0.116889	0.0229119	-0.00621738	-0.000168561	0.0151393	-0.108405	0.00401009	0.0643049	-0.0115426	0.0380156	-0.0355208	0.0271067	0.00195869	0.000271922	0.0932161	0.0330009	0.0523147	0.0886903	-0.0574813	0.0435117	0.0401733	0.0199237	0.0380906	-0.0476801	-0.0152847
V574	0.0242737	-0.0527316	0.0845387	0.0520996	-0.0358189	-0.00225109	-0.0310172	-0.0320249	0.0214269	-0.00359286	-0.031701	-0.00903539	-0.0204815	-0.0379178	-0.0637924	-0.0681759	-0.00177648	-0.0108951	-0.00926759	-0.0217848	0.0421183	-0.0346874	0.0355198	-0.0698546	-0.0806947	0.0627898	0.00624406	0.00485682	-0.0140119	-0.147027	0.00787583	0.0574243	-0.00702098	0.0189698	-0.0359441	-0.0191797	0.0173748	0.0107577	0.122682	0.0169861	0.0488795	0.0875412	-0.0697379	0.0320736	0.0257587	0.0294478	-0.00864437	-0.057403	-0.0136487
V575	0.0223773	-0.0540522	0.086599	0.0549257	-0.024011	0.00164951	-0.0152879	-0.018435	0.0347875	-0.00980713	0.00106193	-0.0207383	-0.000319216	-0.0338293	-0.0573969	-0.0846294	0.0133644	-0.019409	-0.0280139	-0.0198028	0.0356248	-0.0592389	0.0563901	-0.0669236	-0.0251027	0.0922548	0.0154915	0.0204903	-0.0397803	-0.138391	-0.0085446	0.0222667	-0.0278553	0.0244901	-0.0250391	-0.0699317	0.0306898	0.0404167	0.116889	-0.00970518	0.0348954	0.074949	-0.0624384	0.0312617	-0.00524253	0.00285585	-0.0564928	-0.068168	-0.0407703
V576	0.0196177	-0.055285	0.0927073	0.0534341	-0.0168435	0.0236513	0.00536961	-0.00410173	0.0279172	-0.0118119	0.0285698	-0.0416963	0.0289337	-0.0240045	-0.0449552	-0.0815657	0.0214647	-0.022323	-0.0245082	-0.0255768	0.00630005	-0.0840674	0.0393135	-0.0451321	0.0232555	0.090382	0.0219439	0.0332968	-0.0685833	-0.11505	-0.0392609	-0.0260233	-0.0350945	0.0139073	-0.0122804	-0.0552187	0.0214609	0.0391119	0.0596439	-0.0471361	0.0335226	0.0388568	-0.0439692	0.0278705	-0.0283555	-0.0213014	-0.111007	-0.0483636	-0.0335549
V577	0.0141771	-0.0557261	0.0999802	0.0514025	-0.0185421	0.0150208	0.0313108	-0.0147024	0.0232712	-0.00559434	0.0574419	-0.0477173	0.0592725	-0.0261658	-0.0134829	-0.0430039	0.0349916	-0.0508217	-0.0165635	-0.00702295	-0.0181253	-0.0861217	0.0384419	0.00434079	0.0521522	0.0700059	0.0208486	0.0168195	-0.0504939	-0.0638511	-0.0564329	-0.0722239	-0.0640594	0.000856683	0.00636196	-0.0256697	0.0216062	0.0411714	0.0231504	-0.063178	0.0144607	-0.010096	-0.037749	0.0308881	-0.0327527	-0.0521579	-0.112843	-0.0130361	-0.0444247
V578	0.00950249	-0.0595323	0.0984153	0.0419697	-0.0250537	0.00532917	0.0397051	-0.0242498	0.00766521	-0.00450786	0.0672534	-0.0588329	0.0598465	-0.0196153	-0.00294154	0.00910656	0.0560303	-0.079428	0.0160233	0.0169721	0.00166219	-0.0807552	0.0427589	0.0424136	0.0601707	0.0270774	0.0329225	0.0119872	-0.0620683	-0.00641688	-0.069686	-0.0873533	-0.0851262	-0.00788446	0.0304555	0.0202537	0.0423942	0.0339031	-0.0262041	-0.0666692	0.0111543	-0.0397454	-0.00898089	-0.0127981	-0.0514222	-0.0754137	-0.0735242	-0.016933	-0.0391433
V579	0.00551221	-0.0617182	0.0959816	0.0398956	-0.0350742	0.00426351	0.0391632	-0.0341274	-0.00424672	-0.000926859	0.0678199	-0.057181	0.0212476	-0.0407037	-0.0042195	0.0239904	0.0592157	-0.098505	0.0324848	0.0337483	-0.00400437	-0.0644393	0.0695098	0.0360103	0.0309728	-0.0160921	0.0146958	0.0395702	-0.0594431	-0.0184741	-0.0672844	-0.0811383	-0.0781836	0.00462636	0.0147098	0.0809008	0.0252932	0.0219985	-0.0785683	-0.0429597	0.0166104	-0.0544359	0.0253673	-0.0313788	-0.0881533	-0.0665081	-0.0293571	-0.0352346	-0.0241048
V580	0.00624265	-0.0618955	0.0931109	0.0346875	-0.0551347	0.0145392	0.029992	-0.0463932	-0.0125834	0.0228084	0.0286395	-0.0359803	-0.00479457	-0.0485668	-0.0149022	0.047587	0.0441551	-0.100385	0.0281264	0.0875619	0.0154138	-0.041106	0.045204	0.0148752	0.0294132	-0.0729122	-0.0139958	0.0113643	-0.074703	-0.0237471	-0.0678059	-0.049032	-0.0610423	-0.0157773	0.0090092	0.132321	0.0459362	-0.00543918	-0.0872115	-0.0221795	0.00763836	-0.0516343	0.0672944	-0.0237503	-0.0579234	-0.0499544	0.0044211	-0.0319893	-0.0042457
V581	0.00968691	-0.0612658	0.0881615	0.0440264	-0.0586882	0.0275067	0.0360678	-0.0554577	-0.0220879	0.0553371	0.0140047	-0.02935	-0.0229326	-0.0512063	-0.0186894	0.0461882	0.0123645	-0.0528327	0.0096928	0.0967112	0.00432862	0.0167421	0.0330124	-0.0183361	0.0377796	-0.110259	-0.0464882	-0.00837131	-0.0770839	-0.0258205	-0.0606707	0.00270427	-0.0420863	-0.0316488	0.0083771	0.124923	0.0412113	-0.0336056	-0.076313	-0.00517335	0.0120796	-0.0351947	0.0698435	0.0032998	-0.0484972	-0.0361883	0.0449507	-0.0577282	0.00463585
V582	0.015519	-0.0550645	0.0890438	0.0520483	-0.048265	0.0353774	0.0237833	-0.0460732	-0.0183708	0.0550304	-0.0176499	-0.0140039	-0.0558002	-0.0442004	-0.00543902	0.0139461	-0.0163369	-0.0112536	-0.0162571	0.10972	-0.00616628	0.0786514	0.0113895	-0.0202852	0.0563193	-0.117339	-0.066209	-0.0325551	-0.0714819	-0.0437914	-0.0304594	0.0790984	-0.0402889	-0.0190461	0.013236	0.0821086	0.0607858	-0.0524793	-0.00913739	-0.00465533	-0.00821218	-0.0255476	0.0861177	0.0115314	-0.0231284	0.011905	0.0481314	-0.0511064	-0.000273314
V583	0.0202725	-0.0481508	0.0897898	0.0572254	-0.031692	0.0524592	0.0275112	-0.00620814	-0.0368138	0.0385107	-0.0284573	0.00258132	-0.0753044	-0.00272855	-0.00631905	-0.00474322	-0.0550167	0.0130381	-0.0450137	0.0803679	0.00523816	0.110204	0.00335558	-0.0163433	0.0835937	-0.0633004	-0.0439217	-0.04329	-0.0478207	-0.0475036	-0.0256406	0.0962114	-0.0283157	0.000218786	0.0473726	0.0215035	0.0746266	-0.0578848	0.00532493	-0.0259918	-0.0099246	0.021762	0.0871595	0.0473637	-0.0209542	0.0131374	0.0549913	-0.022895	-0.00933872
V584	0.0231809	-0.0467009	0.0900479	0.054319	-0.0254123	0.0534002	0.0326179	0.0212221	-0.0364727	0.0355501	-0.0117527	0.00656744	-0.0696765	0.0108785	-0.0278279	-0.0371305	-0.0824823	0.0322924	-0.0672778	0.0363099	-0.00556497	0.091163	-0.00768899	-0.0227616	0.0901918	0.00384132	-0.0265988	-0.0389957	-0.048913	-0.035738	-0.020326	0.0835525	-0.0204257	-0.00879647	0.0595761	-0.00947595	0.0687168	-0.0248628	0.0304643	-0.0416002	-0.00777285	0.0342847	0.0664814	0.0589986	0.0085282	0.0194371	0.028345	-0.0205914	-0.00658776
V585	0.0257	-0.0445137	0.086864	0.0546101	-0.0184625	0.0556993	0.0359142	0.0355549	-0.037568	0.0169122	0.0121759	0.00731706	-0.0332654	0.0314512	-0.0512773	-0.0486696	-0.0833833	0.0416781	-0.0640691	0.00040927	-0.0570497	0.0680617	-0.0437068	-0.0214114	0.0742848	0.0597331	-0.0357293	0.0162269	-0.0194877	-0.0108313	-0.0200675	0.0595961	0.0179134	0.0334681	0.0132633	-0.0444086	0.0451261	0.0251983	0.000120366	-0.0401183	0.000401944	0.0384472	0.0894599	0.0702724	0.0171472	0.0637321	0.0174262	-0.0148753	0.00324796
V586	0.0237699	-0.0491099	0.0849875	0.0503701	-0.0265262	0.0565782	0.025255	0.024575	-0.052948	0.0286883	0.0277863	5.9243e-06	0.00823539	0.0451404	-0.0747361	-0.0409265	-0.0742162	0.0410792	-0.0438247	-0.0161872	-0.0755603	0.0410427	-0.0615359	-0.0176244	0.040928	0.0772105	-0.037006	0.0614004	0.0249967	0.0311401	-0.0334339	0.0534975	0.0523794	0.0294244	-0.0207241	-0.041178	0.022639	0.0437157	-0.0298105	-0.00423464	0.0248647	-0.0143502	0.0662432	0.0585433	0.0292014	0.0877025	0.023992	-0.018126	0.0344122
V587	0.0198558	-0.0521844	0.0860276	0.051242	-0.0408949	0.0477588	0.0151431	0.0256211	-0.0699042	0.0315641	0.0385775	-0.0125335	0.0439632	0.0503487	-0.0776247	-0.0479686	-0.0585767	0.0566531	-0.0131413	-0.01615	-0.0751462	0.0215381	-0.0610186	-0.0188221	0.00663575	0.069562	-0.0364702	0.0784515	0.0699802	0.0494467	-0.0519935	0.030276	0.055461	0.0345675	-0.0434157	-0.0503406	0.0183292	0.0477174	-0.0755686	-0.0119956	0.0285755	-0.0623317	0.0181687	0.0456211	0.00566444	0.079797	0.0122113	-0.0246318	0.0495987
V588	0.0155332	-0.0547183	0.0847738	0.0487618	-0.0682991	0.0491507	0.00482577	0.0167444	-0.0788932	0.0666526	0.034006	-0.00123149	0.0514305	0.0315187	-0.045273	-0.0299701	-0.0313531	0.0793361	0.024311	0.0120377	-0.059944	0.00208533	-0.0599862	-0.0175288	-0.0423896	0.0383462	-0.00307738	0.0669209	0.0923734	0.048956	-0.0775686	0.0206978	0.0356004	0.0071115	-0.0574437	-0.0340391	0.0405405	0.0400087	-0.0990547	-0.00920294	0.02194	-0.0887903	0.000321422	0.016225	0.00929306	0.0635651	-0.000815615	-0.0499336	0.073115
V589	0.0133657	-0.0559167	0.0836589	0.0475467	-0.0782824	0.0540263	-0.00794622	-0.00958238	-0.052132	0.0965306	0.0325627	0.00406167	0.0490762	-0.00698934	-0.00307297	-0.0198434	-0.0280636	0.0874707	0.0367904	0.0287314	-0.0159647	0.00310937	-0.040775	-0.0310786	-0.0886808	0.00821724	0.0013377	0.0312347	0.102021	0.0427751	-0.074701	0.0496221	0.0175272	-0.0101001	-0.088564	-0.0222474	0.0379124	0.0184169	-0.0654991	0.032584	-0.00493862	-0.117742	-0.00834498	-0.0485955	0.00884602	0.0294809	-0.00382331	-0.0197935	0.0585236
V590	0.0118668	-0.0561033	0.0742857	0.0622996	-0.0648664	0.0528963	-0.0161113	-0.0218015	-0.0330174	0.109719	0.0572735	0.02162	0.0611869	-0.025472	0.0626891	-0.0296939	-0.021206	0.0964417	0.033649	0.0365154	0.00213704	-0.0136549	-0.0127538	-0.0317907	-0.11367	-0.00615105	0.00292824	-0.0112291	0.101137	0.00672333	-0.0715366	0.0710544	0.0373473	-0.0516427	-0.0800811	-0.00158808	0.00924932	0.0013397	-0.0201389	0.0431165	-0.0256025	-0.139367	-0.0134906	-0.0823233	-0.00780086	0.00241909	-0.0298317	0.00835329	0.0387849
V591	0.0111366	-0.0545014	0.0714211	0.0629782	-0.060877	0.0462858	-0.0205265	-0.0566212	-0.0238514	0.112818	0.0794305	0.0493341	0.0385272	-0.0444316	0.0875673	-0.0386753	-0.00715172	0.104895	0.001053	0.0649918	0.0456921	-0.0216684	0.0104233	-0.0277007	-0.0907105	-0.0384386	0.00470216	-0.0199697	0.0652204	-0.0301902	-0.0533984	0.0458123	0.041855	-0.0560869	-0.0528792	0.000356558	-0.00751537	-0.013967	0.0527293	0.0498369	-0.0712948	-0.122728	-0.0134839	-0.0947356	-0.0117992	-0.0112019	-0.00980994	0.0450336	0.00297546
V592	0.0113645	-0.0562155	0.0760272	0.0608834	-0.0430533	0.0387489	-0.0245555	-0.0558772	0.00244614	0.0857949	0.0789325	0.0593754	0.00987433	-0.0311483	0.118642	-0.0497444	0.0275227	0.108776	-0.0465071	0.0864815	0.0605479	-0.00261247	0.0163857	-0.00206965	-0.0443769	-0.0284855	0.0391022	-0.0348019	0.0283204	-0.0528901	-0.0538548	0.0123415	-0.0155954	-0.0483494	-0.023736	-0.00096757	-0.00584658	-0.0113545	0.138175	0.0470911	-0.0623683	-0.0847843	-0.00761294	-0.074953	0.00271102	-0.0172448	0.000877461	0.0773531	-0.0129772
V593	0.0125637	-0.0555432	0.0823196	0.0730652	-0.0221931	0.0407798	-0.00315201	-0.0242964	-0.00337103	0.029985	0.0810524	0.0523831	-0.00606367	4.23203e-05	0.104144	-0.0903974	0.0523024	0.116825	-0.0908077	0.0633656	0.0373825	0.0354896	0.0265786	0.0314949	-0.0125186	-0.00836096	0.0229766	-0.0210111	0.0111412	-0.0413157	-0.0291637	-0.0479326	-0.0529389	-0.034648	-0.000115611	0.00149732	-0.015377	0.0200166	0.134794	0.0370331	-0.0573775	-0.0268164	0.00809778	-0.035756	0.00168432	-0.000131683	0.0195078	0.100437	-0.015982
V594	0.0147324	-0.050139	0.0862961	0.0826113	-0.0105218	0.032559	-0.000793752	0.00430573	-0.00974147	-0.0168257	0.0992469	0.0335769	-0.0236404	0.0160688	0.0795481	-0.0983422	0.0329301	0.0854521	-0.0979213	0.0288803	0.0373192	0.0633987	0.0164653	0.0853831	0.0194235	0.0128028	0.0336594	-0.00273203	0.000841714	-0.0293852	0.0264563	-0.100979	-0.0351667	0.00807486	0.0161044	-0.000841157	0.00642772	0.0189333	0.101129	-0.0107526	-0.0414507	0.0393081	0.0259361	-0.00989942	0.0254428	-0.00502421	0.0872279	0.114657	0.00594052
V595	0.0131494	-0.0437324	0.0875054	0.0936992	-0.013243	0.0170515	-0.00307142	0.0361051	-0.012852	-0.0515553	0.109859	0.0301015	-0.00583281	0.0443755	0.0443333	-0.085699	0.0303501	0.0583159	-0.0909162	0.00774004	0.0287221	0.0658626	0.0167127	0.108538	0.0110245	0.0327424	0.0352145	-0.0186646	0.00804784	0.025531	0.0523907	-0.140784	-0.0274902	0.0413923	0.0305858	-0.0115554	0.021727	0.0398344	0.0558081	-0.0407543	-0.0287253	0.0647545	-0.00579541	0.00996193	-0.00954782	0.00321976	0.103781	0.0886427	-0.0140426
V596	0.0128806	-0.0443412	0.0852124	0.100237	-0.0186071	0.0359702	-0.00359939	0.0610263	-0.0247527	-0.0718695	0.0879084	-0.000218129	0.0127104	0.0577765	-0.00785092	-0.082499	0.0106999	0.0551763	-0.0820705	-0.0304928	-0.00441563	0.0499396	0.0102885	0.0900184	0.00783048	0.0397392	0.0331139	0.00879985	0.0119056	0.0500153	0.0646492	-0.133789	-0.0263483	0.0624778	0.0417897	-0.0189505	0.015168	0.0600125	-0.00626788	-0.0363704	0.0176425	0.0489936	-0.00442234	0.000447246	-0.0331599	-0.0302682	0.10883	0.0362257	0.0145662
V597	0.0118615	-0.041453	0.0912256	0.103464	-0.0376709	0.0513827	-0.0104823	0.0599877	-0.0153463	-0.0695702	0.0626803	-0.0327272	0.0359616	0.0445721	-0.0284159	-0.0627213	-0.00960524	0.0409725	-0.0765122	-0.0423054	-0.0362903	0.0393264	0.0263514	0.048747	0.0063633	0.0160585	0.0226251	0.00447561	0.0479903	0.0635051	0.0713086	-0.102007	-0.0101822	0.0634842	0.0281794	-0.0414911	0.0299961	0.0488938	-0.0125703	-0.0130763	-0.00911726	0.0206357	-0.0458546	-0.00107108	-0.0189891	-0.0173033	0.116966	-0.0318689	0.00475519
V598	0.0118064	-0.0436215	0.0932805	0.0915928	-0.0484668	0.0667946	-0.0116573	0.0377176	-0.0169428	-0.0626051	0.0370753	-0.0384034	0.0742184	0.0509337	-0.0486116	-0.0273626	-0.00992429	0.0457246	-0.0371325	-0.04151	-0.0482477	0.0137801	0.0175461	0.0366978	0.0192835	-0.0151775	-0.00430864	-0.0357069	0.0490811	0.10883	0.0635731	-0.041058	-0.0172443	0.0367159	0.0225643	-0.0633114	0.0448611	0.0371889	-0.0397867	-0.00947629	-0.0369027	-0.00943372	-0.0676396	-0.0380092	-0.0160848	-0.0312243	0.0933195	-0.0790852	-0.0140426
V599	0.0108639	-0.0464368	0.0955698	0.080193	-0.0497053	0.0635087	0.00780456	0.021151	-0.00938413	-0.0515185	0.0472676	-0.0390675	0.0798204	0.0453091	-0.0440553	-0.00858156	0.0221878	0.0313403	-0.00553934	-0.0411808	-0.0500169	-0.0134016	0.0494501	0.0047866	0.0344401	-0.0520824	-0.0158026	-0.0305327	0.0368772	0.129575	0.0582244	0.0115786	-0.0427515	0.0152896	0.00427481	-0.0955837	0.0234793	0.0102188	-0.0199826	0.0299123	-0.0492574	-0.0489541	-0.0673505	-0.0754362	-0.0243863	-0.0307675	0.0490892	-0.0951968	-0.0174095
V600	0.0118142	-0.0512412	0.0953227	0.0660302	-0.0477191	0.0710833	0.0125709	0.00463921	0.000712145	-0.0356809	0.0288291	-0.020571	0.0583832	0.0423797	-0.0187358	0.0172392	0.0364733	0.00348809	0.0321724	-0.00978403	-0.0331123	-0.0488954	0.0579942	-0.0186446	0.0635756	-0.0657577	-0.052082	-0.0596918	0.0133098	0.130053	0.0420711	0.0561513	-0.0649351	0.00843627	-0.0169924	-0.0923997	0.0247643	-0.0269224	0.0154175	0.0400848	-0.0503956	-0.0477002	-0.0599105	-0.104541	-0.0023976	-0.000522879	0.0325695	-0.0448172	-0.0270924
V601	0.0119828	-0.0551611	0.0942498	0.0507977	-0.0429316	0.0592662	0.0228606	-0.00717148	0.00776707	-0.0250022	0.0601032	-0.00375791	0.0359554	0.0326437	-0.00143815	0.044057	0.04764	-0.0359528	0.041975	0.00965649	-0.0233291	-0.0834123	0.0725889	-0.0403956	0.0791465	-0.0630001	-0.0911382	-0.0665418	-0.0219994	0.103635	0.00266971	0.0549717	-0.0618624	0.000798892	-0.034285	-0.0630067	0.0022625	-0.0209245	0.0477539	0.0293312	-0.036999	-0.0202978	-0.0643297	-0.106377	-0.0256378	0.0252851	-0.0145211	0.00434375	-0.0604727
V602	0.0133357	-0.0535815	0.095068	0.0448882	-0.0349133	0.0462542	0.0240207	-0.0229683	0.0109836	-0.0136491	0.0925094	0.0227316	0.0188144	0.0196329	0.0149938	0.0445317	0.0653781	-0.0467653	0.0390004	0.00134495	-0.0252144	-0.0939236	0.0602902	-0.0397687	0.0805292	-0.0579317	-0.0941653	-0.0556537	-0.0431304	0.0399374	-0.015855	0.0533382	-0.0288361	0.0169941	-0.0771982	-0.0107381	-0.00229734	-0.0154269	0.0781023	0.023018	-0.0122769	0.0055128	-0.0318001	-0.0983021	-0.0112445	0.0472484	-0.0144854	0.0338129	-0.0677244
V603	0.0154494	-0.0521161	0.0985438	0.0416356	-0.0271533	0.0426968	0.0268982	-0.025446	-0.00728131	-0.00828457	0.105594	0.0333693	0.00661308	0.0104664	0.0144362	0.0425266	0.0485816	-0.0491888	0.0449521	-0.0118371	-0.00270263	-0.0763877	0.0317909	0.0100722	0.0678698	-0.0365304	-0.0841769	-0.00878648	-0.0324822	0.00608892	-0.0381051	0.00481187	0.0196516	0.0314231	-0.121717	0.0192962	0.0268286	-0.0202899	0.0450885	0.00540989	0.0211704	0.0357581	-0.0187807	-0.0604811	0.0120762	0.0607637	0.0216988	0.0358726	-0.0455052
V604	0.0150168	-0.0513143	0.0998575	0.0489147	-0.0369129	0.0339536	0.030554	-0.00597256	-0.0177522	0.00688011	0.105416	0.0408032	-0.00307092	0.00136678	0.0190291	0.0312742	0.0257781	-0.0414128	0.0424997	0.00447484	0.0299264	-0.0637969	0.014728	0.057097	0.0422479	-0.0390092	-0.0447465	0.010305	-0.0143751	-0.0337102	-0.0563498	-0.0211661	0.0492293	0.00398426	-0.108032	0.0310226	0.0589157	-0.00781522	0.0203805	-0.014071	0.0330537	0.0626716	-0.030857	-0.0163434	0.00725192	0.0834023	0.0628933	0.0299329	-0.0131159
V605	0.014565	-0.0457556	0.0992975	0.0570324	-0.0466387	0.0287521	0.0364547	0.00463701	-0.0346289	0.0318359	0.103793	0.0627915	-0.013703	-0.0104163	0.0327339	0.00019348	0.0219041	-0.00871478	0.0376122	0.0264493	0.0353165	-0.0298334	0.00755252	0.0784972	0.00135172	-0.0229241	-0.0325412	0.0379622	0.0109257	-0.0367893	-0.0532841	-0.063027	0.0746647	-0.0124809	-0.106409	0.0182046	0.0846178	0.0285327	-0.0113866	-0.0194161	0.0367502	0.0651759	-0.0124189	0.0544898	0.00239047	0.0938659	0.0658063	0.0147688	-0.00307615
[truncated: 51 more columns]
